# Supplementary material for: Substrate-controlled, PBu3-catalyzed annulation of phenacylmalononitriles with allenoates enables tunable access to cyclopentenes
Source: Royal Society of Chemistry journal article supplement (doi:10.1039/d0cc04688d), 2020-01-01

# Substrate-controlled, $\text{PBU}_3$ -catalyzed annulation of phenacylmalononitriles with allenates enables tunable access to cyclopentenenes

## SUPPORTING INFORMATION

### Content:

1. General experimental information (p. S2)
2. General procedure for the synthesis of substituted cyclopentenenes (p. S3)
3. Characterization data for compounds **3a-3t** (p. S3)
4. General procedure for the synthesis of cyclopentenols (p.S13)
5. Characterization data for compounds **4a-4k** (p. S13)
6. Mechanistic experiments (p.S18)
7. X-ray data of compounds **3a** and **4b** (p. S20)
8. Copies of  $^1\text{H}$  and  $^{13}\text{C}$  NMR spectra for all compounds (p. S24)

## General experimental information

Unless otherwise specified, all reactions were performed in oven-dried glasswares under nitrogenous atmosphere using dry deoxygenated solvent. The reactions were monitored by TLC visualized by UV (254 nm) and/or with iodine. Column chromatography was performed on 100-200 mesh silica gel using the gradient system ethyl acetate-hexane. NMR data were recorded at Bruker AV 400 MHz in DMSO-d<sub>6</sub>/CDCl<sub>3</sub> using as internal standards the residual DMSO signal for <sup>1</sup>H NMR (δ = 2.50 ppm), CHCl<sub>3</sub> (δ = 7.26 ppm). The corresponding deuterated solvent signal for <sup>13</sup>C were assigned as DMSO (δ = 39.51 ppm), CHCl<sub>3</sub> (δ = 77.16 ppm). Coupling constants are given in Hertz (Hz) and the classical abbreviations are used to describe the signal multiplicities. Melting points were measured with a Büchi B-540 apparatus and are uncorrected. High resolution mass spectra were obtained using Q-TOF mass spectrometer. All commercially available reagents were used as received. All allenic esters <sup>1</sup> and phenacylmalononitriles <sup>2</sup> were synthesized following literature procedure.

- 
1. L. Rout and A. M. Harned, *Chem. - Eur. J.* 2009, **15**, 12926–12928.
  2. (a) M. A. Saleh, S. M. Moustafa, M. Herbert, K. Heinz and H. E. Mohamed, *Molecules* 2009, **14**, 798-806; (b) F. M. Abdelrazek, H. M. Hassaneen, E. M. Nassar and A. Jager, *J. Heterocycl. Chem.* 2014, **51**, 475-479.

## General procedure for the synthesis of substituted cyclopentenes 3a-3t

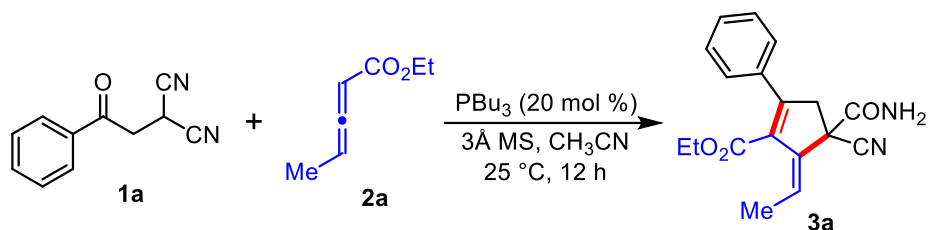

An oven-dried 10 mL Schlenk tube equipped with a magnetic stir bar was charged with 2-(2-oxo-2-phenylethyl)malononitrile **1a** (37 mg, 0.20 mmol) and 3Å MS (100 mg). Subsequently, it was sealed, evacuated, and backfilled with nitrogen. Freshly distilled CH<sub>3</sub>CN (2.0 mL) and ethyl penta-2,3-dienoate **2a** (50 mg, 0.40 mmol) were added via syringe followed by the addition of PBu<sub>3</sub> (8 mg, 0.04 mmol). The reaction mixture was stirred at 25 °C for 12 h. After the completion of the reaction, as indicated by TLC, the solvent was evaporated under reduced pressure. The residue was purified using column chromatography (100-200 mesh silica gel) using ethyl acetate/hexane as the eluent.

### Compound 3a: ethyl 4-carbamoyl-4-cyano-5-ethylidene-2-phenylcyclopent-1-ene-1-carboxylate

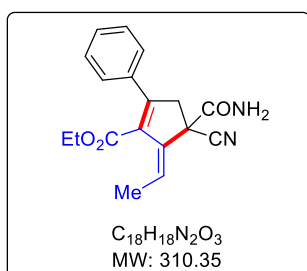

Following the general procedure, treatment of 2-(2-oxo-2-phenylethyl)malononitrile **1a** (37 mg, 0.20 mmol) with ethyl penta-2,3-dienoate **2a** (50 mg, 0.40 mmol) in the presence of PBu<sub>3</sub> (8 mg, 0.04 mmol) in CH<sub>3</sub>CN (2 mL) at 25 °C for 12 h followed by column chromatography afforded the product **3a** as white solid (47 mg, 75%). *R<sub>f</sub>* (EtOAc/Hexane : 4/6) = 0.30. *Mp* 150-152 °C. <sup>13</sup>C NMR (100 MHz, δ ppm/CDCl<sub>3</sub>): 169.1 (C), 167.3 (C), 146.1 (C), 140.2 (C), 133.5 (C), 129.7 (CH), 129.5 (C), 128.7 (CH), 128.7 (CH), 127.1 (CH), 127.1 (CH), 122.7 (CH), 120.0 (C), 61.9 (CH<sub>2</sub>), 51.4 (C), 44.7 (CH<sub>2</sub>), 14.0 (CH<sub>3</sub>), 13.9 (CH<sub>3</sub>). <sup>1</sup>H NMR (400 MHz, δ ppm/CDCl<sub>3</sub>): 7.35 (s, 5H), 6.40 (s, 1H), 6.36 (s, 1H), 5.94 (q, *J* = 7.4 Hz, 1H), 4.29-4.21 (m, 2H), 3.59 (d, *J* = 17.2 Hz, 1H), 3.52 (d, *J* = 17.2 Hz, 1H), 1.79 (d, *J* = 7.6 Hz, 3H), 1.23 (t, *J* = 7.2 Hz, 3H). HRMS for C<sub>18</sub>H<sub>19</sub>N<sub>2</sub>O<sub>3</sub><sup>+</sup>: calcd. [M+H]<sup>+</sup>: 311.1390, found: 311.1387.

### Compound 3b: ethyl 4-carbamoyl-4-cyano-5-ethylidene-2-(4-methoxyphenyl)cyclopent-1-ene-1-carboxylate

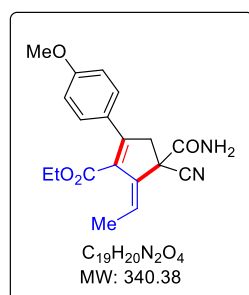

Following the general procedure, treatment of 2-(2-(4-methoxyphenyl)-2-oxoethyl)malononitrile **1b** (43 mg, 0.20 mmol) with ethyl penta-2,3-dienoate **2a** (50 mg, 0.40 mmol) in the presence of PBu<sub>3</sub> (8 mg, 0.04 mmol) in CH<sub>3</sub>CN (2 mL) at 25 °C for 12 h followed by column chromatography afforded the product **3b** as white solid (42 mg, 62%). *R<sub>f</sub>* (EtOAc/Hexane : 4/6) = 0.25. *Mp* 137-139 °C. <sup>13</sup>C NMR (100 MHz, δ ppm/CDCl<sub>3</sub>): 168.9 (C), 167.7 (C), 160.8 (C), 145.5 (C), 140.4 (C), 128.8

(CH), 128.8 (CH), 127.8 (C), 125.9 (C), 121.8 (CH), 120.0 (C), 114.2 (CH), 114.2 (CH), 61.9 (CH<sub>2</sub>), 55.5 (CH<sub>3</sub>), 51.6 (C), 44.6 (CH<sub>2</sub>), 14.0 (CH<sub>3</sub>), 14.0 (CH<sub>3</sub>). <sup>1</sup>H NMR (400 MHz, δ ppm/CDCl<sub>3</sub>): 7.31 (d, *J* = 8.8 Hz, 2H), 6.88 (d, *J* = 8.4 Hz, 2H), 6.28 (s, 1H), 5.90 (q, *J* = 7.4 Hz, 2H), 4.33-4.24 (m, 2H), 3.82 (s, 3H), 3.58 (d, *J* = 17.2 Hz, 1H), 3.51 (d, *J* = 16.8 Hz, 1H), 1.79 (d, *J* = 7.6 Hz, 3H), 1.28 (t, *J* = 7.2 Hz, 3H). HRMS for C<sub>19</sub>H<sub>21</sub>N<sub>2</sub>O<sub>4</sub><sup>+</sup>: calcd. [M+H]<sup>+</sup>: 341.1496, found: 341.1496.

**Compound 3c: ethyl 4-carbamoyl-4-cyano-5-ethylidene-2-(*p*-tolyl)cyclopent-1-ene-1-carboxylate**

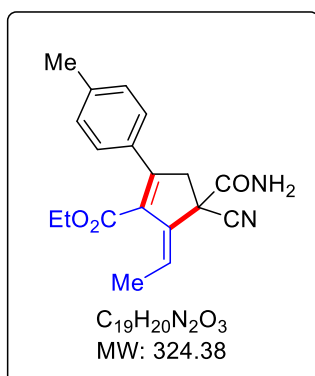

Following the general procedure, treatment of 2-(2-oxo-2-(*p*-tolyl)ethyl)malononitrile **1c** (40 mg, 0.20 mmol) with ethyl penta-2,3-dienoate **2a** (50 mg, 0.40 mmol) in the presence of PBu<sub>3</sub> (8 mg, 0.04 mmol) in CH<sub>3</sub>CN (2 mL) at 25 °C for 12 h followed by column chromatography afforded the product **3c** as brown solid (40 mg, 62%). *R<sub>f</sub>*(EtOAc/Hexane : 4/6) = 0.30. *Mp* 168-170 °C. <sup>13</sup>C NMR (100 MHz, δ ppm/CDCl<sub>3</sub>): 168.9 (C), 167.5 (C), 146.0 (C), 140.3 (C), 140.0 (C), 130.6 (C), 129.5 (CH), 129.5 (CH), 128.8 (C), 127.1 (CH), 127.1 (CH), 122.2 (CH), 120.0 (C), 61.9 (CH<sub>2</sub>), 51.6 (C), 44.7 (CH<sub>2</sub>), 21.5 (CH<sub>3</sub>), 14.0 (CH<sub>3</sub>), 14.0 (CH<sub>3</sub>). <sup>1</sup>H NMR (400 MHz, δ ppm/CDCl<sub>3</sub>): 7.25 (d, *J* = 6.4 Hz, 2H), 7.18-7.16 (m, 2H), 6.28 (s, 1H), 5.99 (s, 1H), 5.92 (q, *J* = 7.6 Hz, 1H), 4.32-4.21 (m, 2H), 3.59 (d, *J* = 18.0 Hz, 1H), 3.52 (d, *J* = 16.8 Hz, 1H), 2.36 (s, 3H), 1.80 (d, *J* = 7.2 Hz, 3H), 1.27 (t, *J* = 7.0 Hz, 3H). HRMS for C<sub>19</sub>H<sub>21</sub>N<sub>2</sub>O<sub>3</sub><sup>+</sup>: calcd. [M+H]<sup>+</sup>: 325.1547, found: 325.1544.

**Compound 3d: ethyl 4-carbamoyl-2-(4-chlorophenyl)-4-cyano-5-ethylidenecyclopent-1-ene-1-carboxylate**

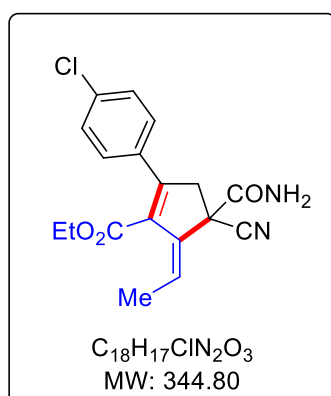

Following the general procedure, treatment of 2-(2-(4-chlorophenyl)-2-oxoethyl)malononitrile **1d** (44 mg, 0.20 mmol) with ethyl penta-2,3-dienoate **2a** (50 mg, 0.40 mmol) in the presence of PBu<sub>3</sub> (8 mg, 0.04 mmol) in CH<sub>3</sub>CN (2 mL) at 25 °C for 12 h followed by column chromatography afforded the product **3d** as white solid (45 mg, 65%). *R<sub>f</sub>*(EtOAc/Hexane : 4/6) = 0.30. *Mp* 140-142 °C. <sup>13</sup>C NMR (100 MHz, δ ppm/DMSO-*d*<sub>6</sub>): 167.4 (C), 166.9 (C), 144.0 (C), 140.4 (C), 133.9 (C), 132.2 (C), 129.0 (C), 128.7 (CH), 128.7 (CH), 128.7 (CH), 128.7 (CH), 121.3 (CH), 120.5 (C), 61.6 (CH<sub>2</sub>), 50.6 (C), 43.0 (CH<sub>2</sub>), 13.6 (CH<sub>3</sub>), 13.3 (CH<sub>3</sub>). <sup>1</sup>H NMR (400 MHz, δ ppm/DMSO-*d*<sub>6</sub>): 7.70 (s, 2H), 7.50 (d, *J* = 8.0 Hz, 2H), 7.41 (d, *J* = 8.4 Hz, 2H), 5.94 (q, *J* = 7.6 Hz, 1H), 4.24 (q, *J* = 7.2 Hz, 2H), 3.59-3.49 (m, 2H), 1.70 (d, *J* = 7.2 Hz, 3H), 1.20 (t, *J* = 7.2 Hz, 3H). HRMS for C<sub>18</sub>H<sub>18</sub>ClN<sub>2</sub>O<sub>3</sub><sup>+</sup>: calcd. [M+H]<sup>+</sup>: 345.1000, found: 345.0996.

**Compound 3e: ethyl 4-carbamoyl-4-cyano-2-(4-cyanophenyl)-5-ethylidenecyclopent-1-ene-1-carboxylate**

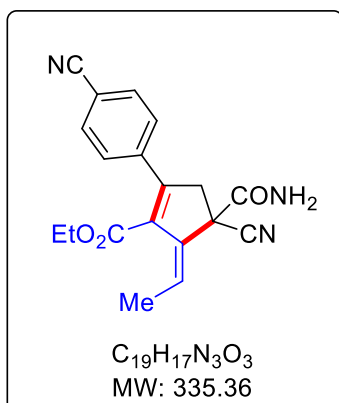

Following the general procedure, treatment of 2-(2-(4-cyanophenyl)-2-oxoethyl)malononitrile **1e** (42 mg, 0.20 mmol) with ethyl penta-2,3-dienoate **2a** (50 mg, 0.40 mmol) in the presence of  $PBu_3$  (8 mg, 0.04 mmol) in  $CH_3CN$  (2 mL) at 25 °C for 12 h followed by column chromatography afforded the product **3e** as white solid (42 mg, 62%).  $R_f$ (EtOAc/Hexane : 4/6) = 0.30. **Mp** 145-147 °C.  $^{13}C$  NMR (100 MHz,  $\delta$  ppm/ $CDCl_3$ ): 168.5 (C), 167.1 (C), 144.8 (C), 140.2 (C), 135.7 (C), 132.0 (C), 130.0 (C), 129.0 (CH), 129.0 (CH), 128.5 (CH), 128.5 (CH), 123.2 (CH), 123.2 (C), 119.9 (C), 62.1 ( $CH_2$ ), 51.3 (C), 44.5 ( $CH_2$ ), 14.1 ( $CH_3$ ), 14.0

( $CH_3$ ).  $^1H$  NMR (400 MHz,  $\delta$  ppm/ $CDCl_3$ ): 7.35-7.32 (m, 2H), 7.30-7.28 (m, 2H), 6.32 (s, 1H), 6.03 (s, 1H), 5.97 (q,  $J$  = 7.6 Hz, 1H), 4.30-4.22 (m, 2H), 3.59 (d,  $J$  = 17.2 Hz, 1H), 3.47 (d,  $J$  = 17.2 Hz, 1H), 1.80 (d,  $J$  = 7.6 Hz, 3H), 1.25 (t,  $J$  = 7.2 Hz, 3H). **HRMS** for  $C_{19}H_{18}N_3O_3^+$ : calcd.  $[M+H]^+$ : 336.1343, found: 336.1321.

**Compound 3f: ethyl 4-carbamoyl-4-cyano-5-ethylidene-2-(3-methoxyphenyl)cyclopent-1-ene-1-carboxylate**

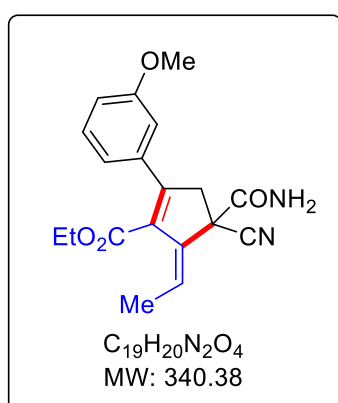

Following the general procedure, treatment of 2-(2-(3-methoxyphenyl)-2-oxoethyl)malononitrile **1f** (43 mg, 0.20 mmol) with ethyl penta-2,3-dienoate **2a** (50 mg, 0.40 mmol) in the presence of  $PBu_3$  (8 mg, 0.04 mmol) in  $CH_3CN$  (2 mL) at 25 °C for 12 h followed by column chromatography afforded the product **3f** as white solid (45 mg, 66%).  $R_f$ (EtOAc/Hexane : 4/6) = 0.25. **Mp** 152-154 °C.  $^{13}C$  NMR (100 MHz,  $\delta$  ppm/ $CDCl_3$ ): 168.9 (C), 167.3 (C), 159.8 (C), 145.9 (C), 140.2 (C), 134.8 (C), 129.8 (CH), 129.8 (C), 122.8 (CH), 120.0 (C), 119.6 (CH), 115.3 (CH), 112.7 (CH), 62.0 ( $CH_2$ ), 55.4 ( $CH_3$ ), 51.4 (C), 44.8 ( $CH_2$ ), 14.0 ( $CH_3$ ), 13.9

( $CH_3$ ).  $^1H$  NMR (400 MHz,  $\delta$  ppm/ $CDCl_3$ ): 7.26-7.22 (m, 1H), 6.91-6.86 (m, 3H), 6.29 (s, 1H), 6.20 (s, 1H), 5.92 (q,  $J$  = 7.6 Hz, 1H), 4.27-4.19 (m, 2H), 3.77 (s, 3H), 3.56 (d,  $J$  = 17.6 Hz, 1H), 3.48 (d,  $J$  = 17.6 Hz, 1H), 1.77 (d,  $J$  = 7.6 Hz, 3H), 1.22 (t,  $J$  = 7.2 Hz, 3H). **HRMS** for  $C_{19}H_{21}N_2O_4^+$ : calcd.  $[M+H]^+$ : 341.1496, found: 341.1498.

**Compound 3g: ethyl 4-carbamoyl-4-cyano-2-(3,4-dichlorophenyl)-5-ethylidenecyclopent-1-ene-1-carboxylate**

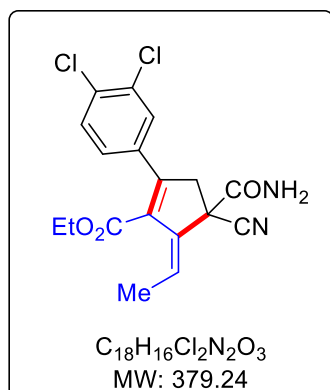

Following the general procedure, treatment of 2-(2-(3,4-dichlorophenyl)-2-oxoethyl)malononitrile **1g** (51 mg, 0.20 mmol) with ethyl penta-2,3-dienoate **2a** (50 mg, 0.40 mmol) in the presence of  $PBu_3$  (8 mg, 0.04 mmol) in  $CH_3CN$  (2 mL) at 25 °C for 12 h followed by column chromatography afforded the product **3g** as white solid (56 mg, 74%).  $R_f$  (EtOAc/Hexane : 4/6) = 0.30. **Mp** 166-168 °C.  $^{13}C$  NMR (100 MHz,  $\delta$  ppm/ $CDCl_3$ ): 168.3 (C), 166.7 (C), 143.4 (C), 140.0 (C), 133.8 (C), 133.5 (C), 133.1 (C), 130.9 (C), 130.8 (CH), 129.1 (CH), 126.4 (CH), 123.9 (CH), 119.8 (C), 62.3 ( $CH_2$ ), 51.1 (C), 44.3 ( $CH_2$ ), 14.1 ( $CH_3$ ), 14.0 ( $CH_3$ ).  $^1H$  NMR (400 MHz,  $\delta$  ppm/ $CDCl_3$ ): 7.46-7.43 (m, 2H), 7.20-7.17 (m, 1H), 6.33 (s, 1H), 6.03 (s, 1H), 6.00 (q,  $J$  = 7.6 Hz, 1H), 4.32-4.25 (m, 2H), 3.58 (d,  $J$  = 17.2 Hz, 1H), 3.44 (d,  $J$  = 17.2 Hz, 1H), 1.80 (d,  $J$  = 7.6 Hz, 3H), 1.28 (t,  $J$  = 7.0 Hz, 3H). **HRMS** for  $C_{18}H_{17}Cl_2N_2O_3^+$ : calcd.  $[M+H]^+$ : 379.0611, found: 379.0606.

**Compound 3h: ethyl 4-carbamoyl-4-cyano-5-ethylidene-2-(naphthalen-2-yl)cyclopent-1-ene-1-carboxylate**

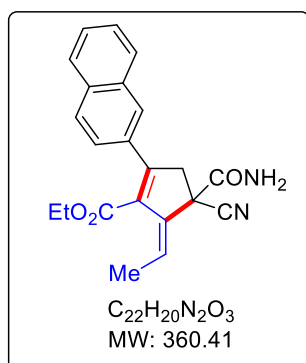

Following the general procedure, treatment of 2-(2-(naphthalen-2-yl)-2-oxoethyl)malononitrile **1h** (47 mg, 0.20 mmol) with ethyl penta-2,3-dienoate **2a** (50 mg, 0.40 mmol) in the presence of  $PBu_3$  (8 mg, 0.04 mmol) in  $CH_3CN$  (2 mL) at 25 °C for 12 h followed by column chromatography afforded the product **3h** as brown solid (50 mg, 70%).  $R_f$  (EtOAc/Hexane : 4/6) = 0.55. **Mp** 156-158 °C.  $^{13}C$  NMR (100 MHz,  $\delta$  ppm/ $CDCl_3$ ): 168.7 (C), 167.4 (C), 146.0 (C), 140.4 (C), 133.7 (C), 133.1 (C), 131.0 (C), 129.8 (C), 128.6 (CH), 128.4 (CH), 127.8 (CH), 127.3 (CH), 127.1 (CH), 126.9 (CH), 124.3 (CH), 122.8 (CH), 120.0 (C), 62.0 ( $CH_2$ ), 51.5 (C), 44.8 ( $CH_2$ ), 14.1 ( $CH_3$ ), 14.0 ( $CH_3$ ).  $^1H$  NMR (400 MHz,  $\delta$  ppm/ $CDCl_3$ ): 7.83-7.77 (m, 4H), 7.54-7.50 (m, 2H), 7.44 (d,  $J$  = 8.8 Hz, 1H), 6.34 (s, 1H), 5.99 (q,  $J$  = 7.4 Hz, 1H), 5.90 (s, 1H), 4.32-4.23 (m, 2H), 3.73 (d,  $J$  = 16.8 Hz, 1H), 3.65 (d,  $J$  = 16.8 Hz, 1H), 1.83 (d,  $J$  = 7.2 Hz, 3H), 1.24 (t,  $J$  = 7.4 Hz, 3H). **HRMS** for  $C_{22}H_{21}N_2O_3^+$ : calcd.  $[M+H]^+$ : 361.1547, found: 361.1544.

**Compound 3i: ethyl 4-carbamoyl-4-cyano-5-ethylidene-2-(4-(pyrrolidin-1-yl)phenyl)cyclopent-1-ene-1-carboxylate**

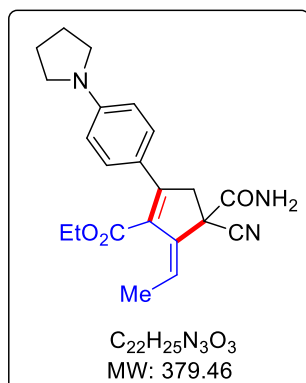

Following the general procedure, treatment of 2-(2-oxo-2-(4-(pyrrolidin-1-yl)phenyl)ethyl)malononitrile **1i** (51 mg, 0.20 mmol) with ethyl penta-2,3-dienoate **2a** (50 mg, 0.40 mmol) in the presence of  $PBu_3$  (8 mg, 0.04 mmol) in  $CH_3CN$  (2 mL) at 25 °C for 12 h followed by column chromatography afforded the product **3i** as white solid (49 mg, 64%).  $R_f$  (EtOAc/Hexane : 4/6) = 0.25. **Mp** 132-134 °C.  $^{13}C$  NMR (100 MHz,  $\delta$  ppm/ $CDCl_3$ ): 169.3 (C), 168.5 (C), 148.8 (C), 145.8 (C), 140.7 (C), 128.7 (CH), 128.7 (CH), 124.8 (C), 120.1 (C), 119.9 (CH), 119.8 (C), 111.5 (CH), 111.5 (CH), 61.8 ( $CH_2$ ), 51.9 (C), 47.6 ( $CH_2$ ), 47.6 ( $CH_2$ ), 44.5 ( $CH_2$ ), 25.6 ( $CH_2$ ), 25.6 ( $CH_2$ ), 14.1 ( $CH_3$ ), 13.9 ( $CH_3$ ).  $^1H$  NMR (400 MHz,  $\delta$  ppm/ $CDCl_3$ ): 7.32 (d,  $J$  = 8.4 Hz, 2H), 6.56 (d,  $J$  = 8.8 Hz, 2H), 6.31 (s, 1H), 5.88 (q,  $J$  = 7.2 Hz, 1H), 5.81 (s, 1H), 4.43-4.34 (m, 2H), 3.62 (s, 2H), 3.38 (t,  $J$  = 7.0 Hz, 4H), 2.10-2.04 (m, 4H), 1.85 (d,  $J$  = 7.2 Hz, 3H), 1.39 (t,  $J$  = 7.2 Hz, 3H). **HRMS** for  $C_{22}H_{25}N_3O_3^+$ : calcd.  $[M+H]^+$ : 380.1969, found: 380.1970.

**Compound 3j: ethyl 4-carbamoyl-4-cyano-2-(3,4-dihydro-2H-benzo[1,4]dioxepin-7-yl)-5-ethylidenecyclopent-1-ene-1-carboxylate**

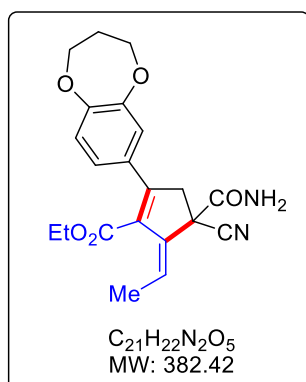

Following the general procedure, treatment of 2-(2-(3,4-dihydro-2H-benzo[1,4]dioxepin-7-yl)-2-oxoethyl)malononitrile **1j** (51 mg, 0.20 mmol) with ethyl penta-2,3-dienoate **2a** (50 mg, 0.40 mmol) in the presence of  $PBu_3$  (8 mg, 0.04 mmol) in  $CH_3CN$  (2 mL) at 25 °C for 12 h followed by column chromatography afforded the product **3j** as brown solid (43 mg, 56%).  $R_f$  (EtOAc/Hexane : 4/6) = 0.25. **Mp** 136-138 °C.  $^{13}C$  NMR (100 MHz,  $\delta$  ppm/ $CDCl_3$ ): 169.0 (C), 167.5 (C), 152.3 (C), 150.9 (C), 144.7 (C), 140.3 (C), 128.6 (C), 128.4 (C), 122.4 (CH), 122.2 (CH), 121.8 (CH), 120.6 (CH), 119.9 (C), 70.6 ( $CH_2$ ), 70.5 ( $CH_2$ ), 62.0 ( $CH_2$ ), 51.4 (C), 44.5 ( $CH_2$ ), 31.5 ( $CH_2$ ), 14.0 ( $CH_3$ ), 14.0 ( $CH_3$ ).  $^1H$  NMR (400 MHz,  $\delta$  ppm/ $CDCl_3$ ): 6.98 (s, 1H), 6.92 (s, 2H), 6.30 (s, 1H), 6.16 (s, 1H), 5.90 (q,  $J$  = 6.0 Hz, 1H), 4.31-4.27 (m, 2H), 4.25-4.20 (m, 4H), 3.54 (d,  $J$  = 18.0 Hz, 1H), 3.46 (d,  $J$  = 13.6 Hz, 1H), 2.22-2.16 (m, 2H), 1.78 (d,  $J$  = 5.6 Hz, 3H), 1.29 (t,  $J$  = 5.6 Hz, 3H). **HRMS** for  $C_{21}H_{23}N_2O_5^+$ : calcd.  $[M+H]^+$ : 383.1601, found: 383.1600.

**Compound 3k: ethyl 4-carbamoyl-4-cyano-5-ethylidene-2-(furan-2-yl)cyclopent-1-ene-1-carboxylate**

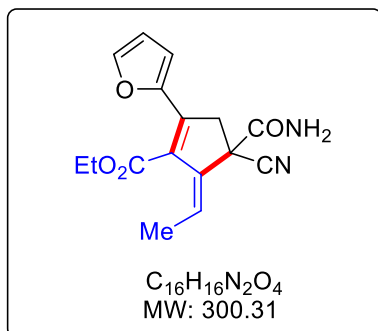

Following the general procedure, treatment of 2-(2-(furan-2-yl)-2-oxoethyl)malononitrile **1k** (35 mg, 0.20 mmol) with ethyl penta-2,3-dienoate **2a** (50 mg, 0.40 mmol) in the presence of  $PBu_3$  (8 mg, 0.04 mmol) in  $CH_3CN$  (2 mL) at 25 °C for 12 h followed by column chromatography afforded the product **3k** as brown solid (44 mg, 73%).  $R_f$ (EtOAc/Hexane : 4/6) = 0.30. **Mp** 138-140 °C.  $^{13}C$  NMR (100 MHz,  $\delta$  ppm/DMSO- $d_6$ ): 167.4 (C), 166.7 (C), 147.9 (C), 145.5 (CH), 140.2 (C), 132.4 (C), 125.3 (C), 120.5 (C), 120.5 (CH), 113.0 (CH), 112.4 (CH), 61.3 (CH<sub>2</sub>), 50.4 (C), 40.5 (CH<sub>2</sub>), 13.8 (CH<sub>3</sub>), 13.2 (CH<sub>3</sub>).  $^1H$  NMR (400 MHz,  $\delta$  ppm/DMSO- $d_6$ ): 7.82 (d,  $J$  = 1.6 Hz, 1H), 7.71-7.70 (m, 2H), 6.79 (d,  $J$  = 3.6 Hz, 1H), 6.64-6.62 (m, 1H), 5.87 (q,  $J$  = 7.0 Hz, 1H), 4.32 (q,  $J$  = 7.2 Hz, 2H), 3.55 (d,  $J$  = 17.2 Hz, 1H), 3.34 (d,  $J$  = 16.4 Hz, 1H), 1.70 (d,  $J$  = 7.6 Hz, 3H), 1.30 (t,  $J$  = 7.2 Hz, 3H). **HRMS** for  $C_{16}H_{17}N_2O_4^+$ : calcd.  $[M+H]^+$ : 301.1183, found: 301.1180.

**Compound 3l: methyl 4-carbamoyl-4-cyano-5-ethylidene-2-phenylcyclopent-1-ene-1-carboxylate**

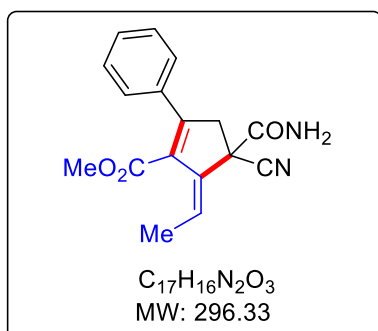

Following the general procedure, treatment of 2-(2-oxo-2-phenylethyl)malononitrile **1a** (37 mg, 0.20 mmol) with methyl penta-2,3-dienoate **2b** (45 mg, 0.40 mmol) in the presence of  $PBu_3$  (8 mg, 0.04 mmol) in  $CH_3CN$  (2 mL) at 25 °C for 12 h followed by column chromatography afforded the product **3l** as white solid (40 mg, 67%).  $R_f$ (EtOAc/Hexane : 4/6) = 0.35. **Mp** 152-154 °C.  $^{13}C$  NMR (100 MHz,  $\delta$  ppm/ $CDCl_3$ ): 166.8 (C), 167.7 (C), 146.3 (C), 140.2 (C), 133.5 (C), 129.8 (CH), 129.0 (C), 128.8 (CH), 128.8 (CH), 127.1 (CH), 127.1 (CH), 122.7 (CH), 119.9 (C), 52.6 (CH<sub>3</sub>), 51.4 (C), 44.6 (CH<sub>2</sub>), 13.9 (CH<sub>3</sub>).  $^1H$  NMR (400 MHz,  $\delta$  ppm/ $CDCl_3$ ): 7.37-7.34 (m, 5H), 6.32 (s, 1H), 6.15 (s, 1H), 5.95 (q,  $J$  = 7.2 Hz, 1H), 3.79 (s, 3H), 3.61 (d,  $J$  = 17.2 Hz, 1H), 3.52 (d,  $J$  = 17.2 Hz, 1H), 1.78 (d,  $J$  = 7.6 Hz, 3H). **HRMS** for  $C_{17}H_{17}N_2O_3^+$ : calcd.  $[M+H]^+$ : 297.1234, found: 297.1227.



**Compound 3m: ethyl 5-butylidene-4-carbamoyl-4-cyano-2-phenylcyclopent-1-ene-1-carboxylate**

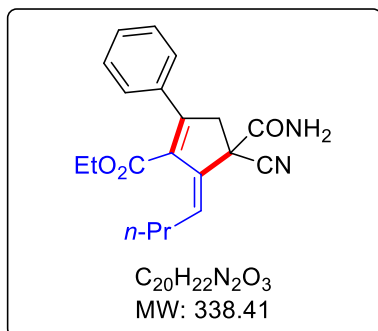

Following the general procedure, treatment of 2-(2-oxo-2-phenylethyl)malononitrile **1a** (37 mg, 0.20 mmol) with ethyl hepta-2,3-dienoate **2c** (62 mg, 0.40 mmol) in the presence of  $PBu_3$  (8 mg, 0.04 mmol) in  $CH_3CN$  (2 mL) at 25 °C for 12 h followed by column chromatography afforded the product **3m** as white solid (45 mg, 66%).  $R_f$  (EtOAc/Hexane : 4/6) = 0.35.

**Mp** 123-125 °C.  $^{13}C$  NMR (100 MHz,  $\delta$  ppm/ $CDCl_3$ ): 168.7 (C), 167.3 (C), 146.0 (C), 139.4 (C), 133.6 (C), 129.7 (C), 129.7 (CH),

128.8 (CH), 128.8 (CH), 128.7 (CH), 127.1 (CH), 127.1 (CH), 119.9 (C), 62.0 ( $CH_2$ ), 51.6 (C), 44.7 ( $CH_2$ ), 30.4 ( $CH_2$ ), 22.8 ( $CH_2$ ), 13.9 ( $CH_3$ ), 13.9 ( $CH_3$ ).  $^1H$  NMR (400 MHz,  $\delta$  ppm/ $CDCl_3$ ): 7.36 (s, 5H), 6.28 (s, 1H), 5.86 (t,  $J$  = 7.8 Hz, 2H), 4.31-4.21 (m, 2H), 3.61 (d,  $J$  = 17.2 Hz, 1H), 3.54 (d,  $J$  = 16.8 Hz, 1H), 2.16-2.10 (m, 2H), 1.54-1.44 (m, 2H), 1.24 (t,  $J$  = 7.0 Hz, 3H), 0.93 (t,  $J$  = 7.2 Hz, 3H). **HRMS** for  $C_{20}H_{23}N_2O_3^+$ : calcd.  $[M+H]^+$ : 339.1703, found: 339.1704.

**Compound 3n: ethyl 4-carbamoyl-4-cyano-5-pentylidene-2-phenylcyclopent-1-ene-1-carboxylate**

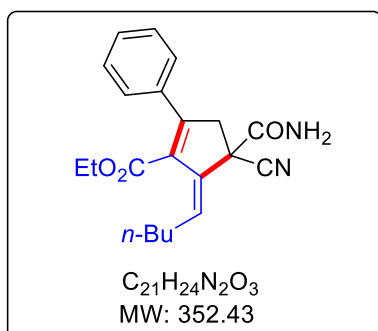

Following the general procedure, treatment of 2-(2-oxo-2-phenylethyl)malononitrile **1a** (37 mg, 0.20 mmol) with ethyl octa-2,3-dienoate **2d** (67 mg, 0.40 mmol) in the presence of  $PBu_3$  (8 mg, 0.04 mmol) in  $CH_3CN$  (2 mL) at 25 °C for 12 h followed by column chromatography afforded the product **3n** as white solid (45 mg, 64%).  $R_f$  (EtOAc/Hexane : 4/6) = 0.35.

**Mp** 145-147 °C.  $^{13}C$  NMR (100 MHz,  $\delta$  ppm/ $CDCl_3$ ): 169.0 (C), 167.4 (C), 145.9 (C), 139.1 (C), 133.6 (C), 129.7 (C), 129.7 (CH),

128.9 (CH), 128.7 (CH), 128.7 (CH), 127.1 (CH), 127.1 (CH), 119.9 (C), 62.0 ( $CH_2$ ), 51.6 (C), 44.6 ( $CH_2$ ), 31.6 ( $CH_2$ ), 28.2 ( $CH_2$ ), 22.5 ( $CH_2$ ), 14.0 ( $CH_3$ ), 13.9 ( $CH_3$ ).  $^1H$  NMR (400 MHz,  $\delta$  ppm/ $CDCl_3$ ): 7.37-7.32 (m, 5H), 6.30 (s, 1H), 6.14 (s, 1H), 5.85 (t,  $J$  = 7.6 Hz, 1H), 4.29-4.20 (m, 2H), 3.59 (d,  $J$  = 17.2 Hz, 1H), 3.53 (d,  $J$  = 16.8 Hz, 1H), 2.18-2.10 (m, 2H), 1.48-1.40 (m, 2H), 1.36-1.30 (m, 2H), 1.23 (t,  $J$  = 7.0 Hz, 3H), 0.90 (t,  $J$  = 7.2 Hz, 3H). **HRMS** for  $C_{21}H_{24}N_2NaO_3^+$ : calcd.  $[M+Na]^+$ : 375.1679, found: 375.1680.

**Compound 3o:** ethyl 4-carbamoyl-4-cyano-5-hexylidene-2-phenylcyclopent-1-ene-1-carboxylate

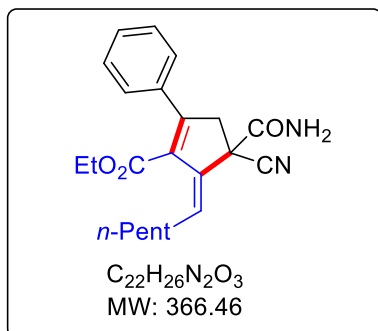

Following the general procedure, treatment of 2-(2-oxo-2-phenylethyl)malononitrile **1a** (37 mg, 0.20 mmol) with ethyl nona-2,3-dienoate **2e** (73 mg, 0.40 mmol) in the presence of  $PBu_3$  (8 mg, 0.04 mmol) in  $CH_3CN$  (2 mL) at 25 °C for 12 h followed by column chromatography afforded the product **3o** as white solid (47 mg, 64%).  $R_f$  (EtOAc/Hexane : 2/8) = 0.35. **Mp** 115-117 °C.  $^{13}C$  NMR (100 MHz,  $\delta$  ppm/ $CDCl_3$ ): 169.0 (C), 167.4 (C), 145.9 (C), 139.1 (C), 133.6 (C), 129.7 (C), 129.7 (CH),

129.0 (CH), 128.7 (CH), 128.7 (CH), 127.1 (CH), 127.1 (CH), 119.9 (C), 61.9 ( $CH_2$ ), 51.6 (C), 44.6 ( $CH_2$ ), 31.6 ( $CH_2$ ), 29.2 ( $CH_2$ ), 28.5 ( $CH_2$ ), 22.5 ( $CH_2$ ), 14.1 ( $CH_3$ ), 13.9 ( $CH_3$ ).  $^1H$  NMR (400 MHz,  $\delta$  ppm/ $CDCl_3$ ): 7.37-7.32 (m, 5H), 6.30 (s, 1H), 6.19 (s, 1H), 5.85 (t,  $J$  = 7.6 Hz, 1H), 4.29-4.20 (m, 2H), 3.59 (d,  $J$  = 17.2 Hz, 1H), 3.53 (d,  $J$  = 17.2 Hz, 1H), 2.19-2.09 (m, 2H), 1.49-1.42 (m, 2H), 1.32-1.27 (m, 4H), 1.23 (t,  $J$  = 7.2 Hz, 3H), 0.89 (t,  $J$  = 6.8 Hz, 3H). **HRMS** for  $C_{22}H_{26}N_2NaO_3^+$ : calcd.  $[M+Na]^+$ : 389.1836, found: 389.1838.

**Compound 3p:** ethyl 4-carbamoyl-4-cyano-5-heptylidene-2-phenylcyclopent-1-ene-1-carboxylate

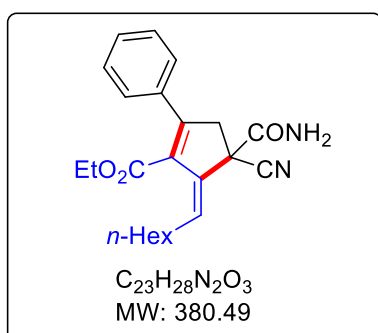

Following the general procedure, treatment of 2-(2-oxo-2-phenylethyl)malononitrile **1a** (37 mg, 0.20 mmol) with ethyl deca-2,3-dienoate **2f** (79 mg, 0.40 mmol) in the presence of  $PBu_3$  (8 mg, 0.04 mmol) in  $CH_3CN$  (2 mL) at 25 °C for 12 h followed by column chromatography afforded the product **3p** as white solid (57 mg, 75%).  $R_f$  (EtOAc/Hexane : 4/6) : 2/8) = 0.35. **Mp** 140-142 °C.  $^{13}C$  NMR (100 MHz,  $\delta$  ppm/ $CDCl_3$ ): 168.8 (C), 167.4 (C), 145.9 (C), 139.1 (C), 133.6 (C), 129.7 (C), 129.7 (CH), 129.0 (CH), 128.8 (CH), 128.8 (CH), 127.1 (CH), 127.1 (CH), 119.9 (C), 61.9 ( $CH_2$ ), 51.6 (C),

44.7 ( $CH_2$ ), 31.7 ( $CH_2$ ), 29.5 ( $CH_2$ ), 29.1 ( $CH_2$ ), 28.5 ( $CH_2$ ), 22.7 ( $CH_2$ ), 14.2 ( $CH_3$ ), 13.9 ( $CH_3$ ).  $^1H$  NMR (400 MHz,  $\delta$  ppm/ $CDCl_3$ ): 7.37-7.33 (m, 5H), 6.28 (s, 1H), 5.96 (s, 1H), 5.86 (t,  $J$  = 7.6 Hz, 1H), 4.29-4.20 (m, 2H), 3.60 (d,  $J$  = 17.2 Hz, 1H), 3.54 (d,  $J$  = 17.2 Hz, 1H), 2.17-2.12 (m, 2H), 1.49-1.41 (m, 2H), 1.33-1.25 (m, 6H), 1.24 (t,  $J$  = 7.2 Hz, 3H), 0.88 (t,  $J$  = 6.8 Hz, 3H). **HRMS** for  $C_{23}H_{28}N_2NaO_3^+$ : calcd.  $[M+Na]^+$ : 403.1992, found: 403.1993.

**Compound 3q:** ethyl 4-carbamoyl-4-cyano-5-octylidene-2-phenylcyclopent-1-ene-1-carboxylate

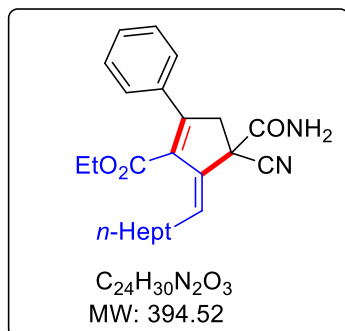

Following the general procedure, treatment of 2-(2-oxo-2-phenylethyl)malononitrile **1a** (37 mg, 0.20 mmol) with ethyl undeca-2,3-dienoate **2g** (84 mg, 0.40 mmol) in the presence of  $PBu_3$  (8 mg, 0.04 mmol) in  $CH_3CN$  (2 mL) at 25 °C for 12 h followed by column chromatography afforded the product **3q** as brown solid (59 mg, 75%).  $R_f$ (EtOAc/Hexane : 4/6) = 0.40. **Mp** 155-157 °C.  $^{13}C$  NMR (100 MHz,  $\delta$  ppm/ $CDCl_3$ ): 168.8 (C), 167.4 (C), 145.9 (C), 139.1 (C), 133.6 (C), 129.7 (C), 129.7 (CH), 129.0 (CH), 128.8 (CH), 128.8 (CH), 127.1 (CH), 127.1 (CH), 119.9 (C), 62.0 ( $CH_2$ ), 51.6 (C), 44.6 ( $CH_2$ ), 31.9 ( $CH_2$ ), 29.5 ( $CH_2$ ), 29.4 ( $CH_2$ ), 29.2 ( $CH_2$ ), 28.6 ( $CH_2$ ), 22.8 ( $CH_2$ ), 14.2 ( $CH_3$ ), 13.9 ( $CH_3$ ).  $^1H$  NMR (400 MHz,  $\delta$  ppm/ $CDCl_3$ ): 7.38-7.32 (m, 5H), 6.29 (s, 1H), 5.88 (s, 1H), 5.86 (t,  $J$  = 7.8 Hz, 1H), 4.29-4.20 (m, 2H), 3.60 (d,  $J$  = 17.2 Hz, 1H), 3.54 (d,  $J$  = 17.2 Hz, 1H), 2.17-2.10 (m, 2H), 1.47-1.41 (m, 2H), 1.32-1.26 (m, 8H), 1.24 (t,  $J$  = 7.2 Hz, 3H), 0.88 (t,  $J$  = 6.8 Hz, 3H). **HRMS** for  $C_{24}H_{31}N_2O_3^+$ : calcd.  $[M+H]^+$ : 395.2329, found: 395.2321.

**Compound 3r:** ethyl 4-carbamoyl-4-cyano-2-phenyl-5-undecylidene-cyclopent-1-ene-1-carboxylate

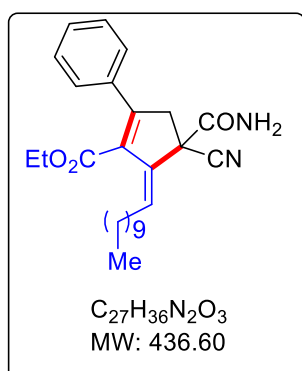

Following the general procedure, treatment of 2-(2-oxo-2-phenylethyl)malononitrile **1a** (37 mg, 0.20 mmol) with ethyl tetradeca-2,3-dienoate **2h** (101 mg, 0.40 mmol) in the presence of  $PBu_3$  (8 mg, 0.04 mmol) in  $CH_3CN$  (2 mL) at 25 °C for 12 h followed by column chromatography afforded the product **3r** as brown solid (59 mg, 68%).  $R_f$ (EtOAc/Hexane : 4/6) = 0.45. **Mp** 70-72 °C.  $^{13}C$  NMR (100 MHz,  $\delta$  ppm/ $CDCl_3$ ): 169.0 (C), 167.4 (C), 145.9 (C), 139.1 (C), 133.6 (C), 129.7 (C), 129.7 (CH), 129.6 (CH), 128.7 (CH), 128.7 (CH), 127.1 (CH), 127.1 (CH), 119.9 (C), 62.0 ( $CH_2$ ), 51.6 (C), 44.6 ( $CH_2$ ), 32.0 ( $CH_2$ ), 29.7 ( $CH_2$ ), 29.7 ( $CH_2$ ), 29.5 ( $CH_2$ ), 29.5 ( $CH_2$ ), 29.5 ( $CH_2$ ), 29.4 ( $CH_2$ ), 28.6 ( $CH_2$ ), 22.8 ( $CH_2$ ), 14.2 ( $CH_3$ ), 13.9 ( $CH_3$ ).  $^1H$  NMR (400 MHz,  $\delta$  ppm/ $CDCl_3$ ): 7.38-7.34 (m, 5H), 6.30 (s, 1H), 6.11 (s, 1H), 5.85 (t,  $J$  = 7.8 Hz, 1H), 4.29-4.20 (m, 2H), 3.59 (d,  $J$  = 17.2 Hz, 1H), 3.53 (d,  $J$  = 17.2 Hz, 1H), 2.16-2.11 (m, 2H), 1.48-1.41 (m, 2H), 1.31-1.25 (m, 14H), 1.23 (t,  $J$  = 7.2 Hz, 3H), 0.88 (t,  $J$  = 7.2 Hz, 3H). **HRMS** for  $C_{27}H_{37}N_2O_3^+$ : calcd.  $[M+H]^+$ : 437.2799, found: 437.2791.

**Compound 3s: ethyl 4-carbamoyl-4-cyano-5-pentadecylidene-2-phenylcyclopent-1-ene-1-carboxylate**

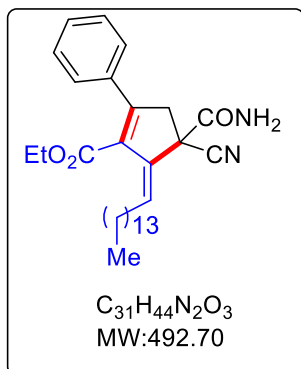

Following the general procedure, treatment of 2-(2-oxo-2-phenylethyl)malononitrile **1a** (37 mg, 0.20 mmol) with ethyl octadeca-2,3-dienoate **2i** (123 mg, 0.40 mmol) in the presence of  $PBu_3$  (8 mg, 0.04 mmol) in  $CH_3CN$  (2 mL) at 25 °C for 12 h followed by column chromatography afforded the product **3s** as brown solid (59 mg, 60%).  $R_f$  (EtOAc/Hexane : 4/6) = 0.50. **Mp** 115-117 °C.  $^{13}C$  **NMR** (100 MHz,  $\delta$  ppm/ $CDCl_3$ ): 168.9 (C), 167.4 (C), 145.9 (C), 139.1 (C), 133.6 (C), 129.7 (C), 129.7 (CH), 129.0 (CH), 128.8 (CH), 128.8 (CH), 127.1 (CH), 127.1 (CH), 119.9 (C), 62.0 ( $CH_2$ ), 51.6 (C), 44.6 ( $CH_2$ ), 32.1 ( $CH_2$ ), 29.8 ( $CH_2$ ), 29.7 ( $CH_2$ ), 29.5 ( $CH_2$ ), 29.5 ( $CH_2$ ), 29.5 ( $CH_2$ ), 28.6 ( $CH_2$ ), 22.9 ( $CH_2$ ), 14.2 ( $CH_3$ ), 13.9 ( $CH_3$ ).  $^1H$  **NMR** (400 MHz,  $\delta$  ppm/ $CDCl_3$ ): 7.38-7.32 (m, 5H), 6.29 (s, 1H), 6.01 (s, 1H), 5.85 (t,  $J = 7.8$  Hz, 1H), 4.29-4.20 (m, 2H), 3.60 (d,  $J = 17.6$  Hz, 1H), 3.54 (d,  $J = 17.6$  Hz, 1H), 2.17-2.11 (m, 2H), 1.48-1.38 (m, 2H), 1.32-1.26 (m, 22H), 1.23 (t,  $J = 7.2$  Hz, 3H), 0.88 (t,  $J = 6.8$  Hz, 3H). **HRMS** for  $C_{31}H_{45}N_2O_3^+$ : calcd.  $[M+H]^+$ : 493.3425, found: 493.3416.

**Compound 3t: ethyl 5-(5-bromopentylidene)-4-carbamoyl-4-cyano-2-phenylcyclopent-1-ene-1-carboxylate**

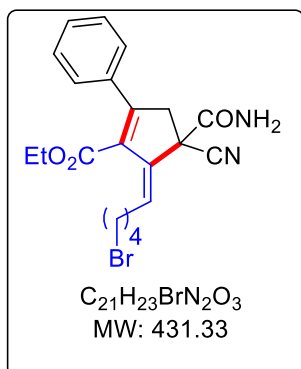

Following the general procedure, treatment of 2-(2-oxo-2-phenylethyl)malononitrile **1a** (37 mg, 0.20 mmol) with ethyl 8-bromoocta-2,3-dienoate **2j** (99 mg, 0.40 mmol) in the presence of  $PBu_3$  (8 mg, 0.04 mmol) in  $CH_3CN$  (2 mL) at 25 °C for 12 h followed by column chromatography afforded the product **3n** as white solid (45 mg, 52%).  $R_f$  (EtOAc/Hexane : 4/6) = 0.35. **Mp** 153-155 °C.  $^{13}C$  **NMR** (100 MHz,  $\delta$  ppm/ $CDCl_3$ ): 168.9 (C), 167.3 (C), 145.6 (C), 139.8 (C), 133.5 (C), 129.7 (CH), 129.5 (C), 128.7 (CH), 128.7 (CH), 127.5 (CH), 127.1 (CH), 127.1 (CH), 119.9 (C), 62.0 ( $CH_2$ ), 51.4 (C), 44.6 ( $CH_2$ ), 33.4 ( $CH_2$ ), 32.2 ( $CH_2$ ), 27.9 ( $CH_2$ ), 27.4 ( $CH_2$ ), 13.9 ( $CH_3$ ).  $^1H$  **NMR** (400 MHz,  $\delta$  ppm/ $CDCl_3$ ): 7.37-7.31 (m, 5H), 6.36 (s, 2H), 5.81 (t,  $J = 7.6$  Hz, 1H), 4.28-4.20 (m, 2H), 3.59 (d,  $J = 17.6$  Hz, 1H), 3.52 (d,  $J = 17.6$  Hz, 1H), 3.40 (t,  $J = 7.0$  Hz, 2H), 2.21-2.15 (m, 2H), 1.90-1.83 (m, 2H), 1.65-1.59 (m, 2H), 1.22 (t,  $J = 7.2$  Hz, 3H). **HRMS** for  $C_{21}H_{24}BrN_2O_3^+$ : calcd.  $[M+H]^+$ : 431.0965, found: 431.0965.

## General procedure for the synthesis of cyclopentenols 4a-4k.

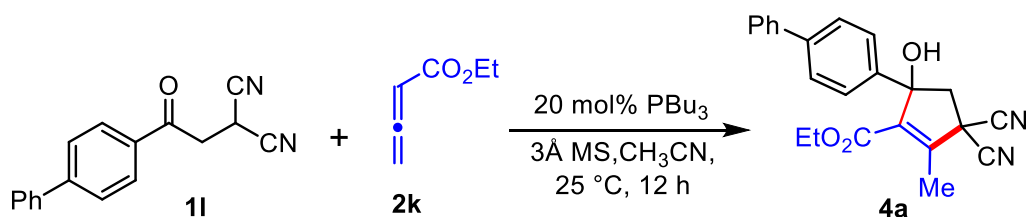

An oven-dried 10 mL Schlenk tube equipped with a magnetic stir bar was charged with 2-(2-([1,1'-biphenyl]-4-yl)-2-oxoethyl)malononitrile **1l** (37 mg, 0.20 mmol) and 3Å MS (100 mg). Subsequently it was sealed, evacuated, and backfilled with nitrogen. Then, freshly distilled CH<sub>3</sub>CN (2.0 mL), ethyl buta-2,3-dienoate **2k** (45 mg, 0.40 mmol) were added via syringe followed by addition of PBU<sub>3</sub> (8 mg, 0.04 mmol). This reaction mixture was stirred at 25 °C for 12 h. After the completion of reaction, as indicated by TLC, solvent was evaporated under reduced pressure. The residue was purified using column chromatography (100-200 mesh silica gel) using ethyl acetate/hexane as the eluent.

### Compound 4a: ethyl 5-([1,1'-biphenyl]-4-yl)-3,3-dicyano-5-hydroxy-2-methylcyclopent-1-ene-1-carboxylate

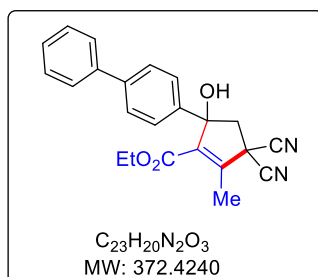

Following the general procedure, treatment of 2-(2-([1,1'-biphenyl]-4-yl)-2-oxoethyl)malononitrile **1l** (52 mg, 0.20 mmol) with ethyl buta-2,3-dienoate **2k** (45 mg, 0.40 mmol) in the presence of PBU<sub>3</sub> (8 mg, 0.04 mmol) in CH<sub>3</sub>CN (2 mL) at 25 °C for 12 h followed by column chromatography afforded the product **4a** as yellow viscous liquid (66 mg, 88%).  $R_f$ (EtOAc/Hexane : 2/8) = 0.15. <sup>13</sup>C NMR (100 MHz, δ ppm/CDCl<sub>3</sub>): 163.7 (C), 144.8 (C), 142.5 (C), 141.4 (C), 140.4 (C), 139.4 (C), 129.0 (CH), 129.0 (CH), 127.7 (CH), 127.7 (CH), 127.7 (CH), 127.2 (CH), 127.2 (CH), 124.8 (CH), 124.8 (CH), 113.9 (C), 113.9 (C), 86.2 (C), 62.0 (CH<sub>2</sub>), 51.0 (C), 42.8 (CH<sub>2</sub>), 14.0 (CH<sub>3</sub>), 13.8 (CH<sub>3</sub>). <sup>1</sup>H NMR (400 MHz, δ ppm/CDCl<sub>3</sub>): 7.61-7.57 (m, 4H), 7.46-7.40 (m, 4H), 7.38-7.35 (m, 1H), 4.28-4.12 (m, 2H), 3.66 (s, 1H), 3.15 (d, *J* = 11.6 Hz, 1H), 2.85 (d, *J* = 11.6 Hz, 1H), 2.49 (s, 3H), 1.16 (t, *J* = 5.6 Hz, 3H). HRMS for C<sub>23</sub>H<sub>20</sub>N<sub>2</sub>NaO<sub>3</sub><sup>+</sup>: calcd. [M+Na]<sup>+</sup>: 395.1366, found: 395.1353.

### Compound 4b: ethyl 5-(4-bromophenyl)-3,3-dicyano-5-hydroxy-2-methylcyclopent-1-ene-1-carboxylate

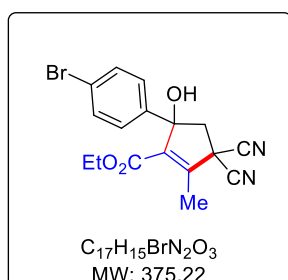

Following the general procedure, treatment of 2-(2-(4-bromophenyl)-2-oxoethyl)malononitrile **1m** (53 mg, 0.20 mmol) with ethyl buta-2,3-dienoate **2k** (45 mg, 0.40 mmol) in the presence of PBU<sub>3</sub> (8 mg, 0.04 mmol) in CH<sub>3</sub>CN (2 mL) at 25 °C for 12 h followed by column chromatography afforded the product **4b** as white solid (47 mg, 62%).  $R_f$ (EtOAc/Hexane : 2/8) = 0.15. **Mp** 146-148 °C. <sup>13</sup>C NMR

(100 MHz,  $\delta$  ppm/ $\text{CDCl}_3$ ): 163.5 (C), 145.3 (C), 142.7 (C), 138.9 (C), 132.2 (CH), 132.2 (CH), 126.2 (CH), 126.2 (CH), 122.6 (C), 113.7 (C), 113.6 (C), 85.9 (C), 62.1 ( $\text{CH}_2$ ), 50.8 (C), 42.7 ( $\text{CH}_2$ ), 14.0 ( $\text{CH}_3$ ), 13.9 ( $\text{CH}_3$ ).  $^1\text{H NMR}$  (400 MHz,  $\delta$  ppm/ $\text{CDCl}_3$ ): 7.52-7.48 (m, 2H), 7.24-7.20 (m, 2H), 4.25-4.16 (m, 2H), 3.64 (s, 1H), 3.10 (d,  $J = 14.4$  Hz, 1H), 2.75 (d,  $J = 13.2$  Hz, 1H), 2.46 (s, 3H), 1.17 (t,  $J = 7.2$  Hz, 3H). **HRMS** for  $\text{C}_{17}\text{H}_{16}\text{BrN}_2\text{O}_3^+$ : calcd.  $[\text{M}+\text{H}]^+$ : 375.0339, found: 375.0333.

**Compound 4c: ethyl 3,3-dicyano-5-(4-cyanophenyl)-5-hydroxy-2-methylcyclopent-1-ene-1-carboxylate**

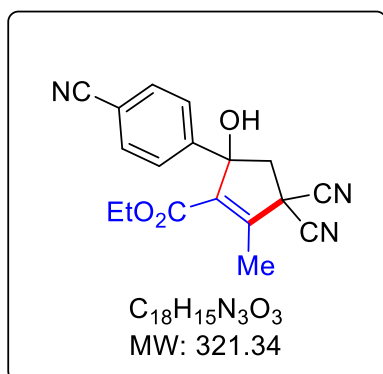

Following the general procedure, treatment of 2-(2-(4-cyanophenyl)-2-oxoethyl)malononitrile **1e** (42 mg, 0.20 mmol) with ethyl buta-2,3-dienoate **2k** (45 mg, 0.40 mmol) in the presence of  $\text{PBU}_3$  (8 mg, 0.04 mmol) in  $\text{CH}_3\text{CN}$  (2 mL) at 25  $^\circ\text{C}$  for 12 h followed by column chromatography afforded the product **4c** as white solid (42 mg, 65%).  $R_f$  (EtOAc/Hexane : 2/8) = 0.20. **Mp** 112-114  $^\circ\text{C}$ .  $^{13}\text{C NMR}$  (100 MHz,  $\delta$  ppm/ $\text{CDCl}_3$ ): 163.5 (C), 145.3 (C), 142.1 (C), 139.0 (C), 134.5 (CH), 129.3 (CH), 129.3 (CH), 125.9 (CH), 125.9 (C), 113.7 (C),

113.7 (C), 113.7 (C), 85.9 (C), 62.1 ( $\text{CH}_2$ ), 50.9 (C), 42.7 ( $\text{CH}_2$ ), 14.1 ( $\text{CH}_3$ ), 13.9 ( $\text{CH}_3$ ).  $^1\text{H NMR}$  (400 MHz,  $\delta$  ppm/ $\text{CDCl}_3$ ): 7.37-7.33 (m, 2H), 7.30-7.27 (m, 2H), 4.25-4.12 (m, 2H), 3.63 (s, 1H), 3.10 (d,  $J = 14.4$  Hz, 1H), 2.75 (d,  $J = 14.4$  Hz, 1H), 2.47 (s, 3H), 1.17 (t,  $J = 7.2$  Hz, 3H). **HRMS** for  $\text{C}_{18}\text{H}_{14}\text{N}_3\text{O}_3^-$ : calcd.  $[\text{M}-\text{H}]^-$ : 320.1041, found: 320.1035

**Compound 4d: ethyl 3,3-dicyano-5-(3,4-dimethoxyphenyl)-5-hydroxy-2-methylcyclopent-1-ene-1-carboxylate**

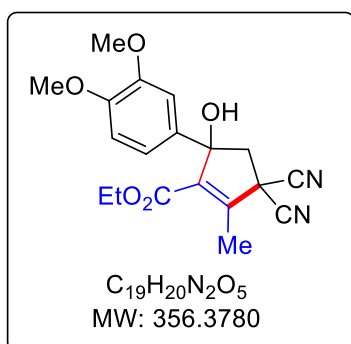

Following the general procedure, treatment of 2-(2-(3,4-dimethoxyphenyl)-2-oxoethyl)malononitrile **1n** (49 mg, 0.20 mmol) with ethyl buta-2,3-dienoate **2k** (45 mg, 0.40 mmol) in the presence of  $\text{PBU}_3$  (8 mg, 0.04 mmol) in  $\text{CH}_3\text{CN}$  (2 mL) at 25  $^\circ\text{C}$  for 12 h followed by column chromatography afforded the product **4d** as brown solid (50 mg, 70%).  $R_f$  (EtOAc/Hexane : 2/8) = 0.10. **Mp** 144-146  $^\circ\text{C}$ .  $^{13}\text{C NMR}$  (100 MHz,  $\delta$  ppm/ $\text{CDCl}_3$ ): 163.8 (C), 149.5 (C), 149.1 (C), 144.3 (C), 139.4 (C), 136.1 (C), 116.5 (CH), 113.9 (C), 113.8 (C), 111.3 (CH), 107.7 (CH), 86.1 (C), 61.9 ( $\text{CH}_2$ ), 56.1 ( $\text{CH}_3$ ), 56.0 ( $\text{CH}_3$ ),

51.1 (C), 42.6 ( $\text{CH}_2$ ), 14.1 ( $\text{CH}_3$ ), 13.9 ( $\text{CH}_3$ ).  $^1\text{H NMR}$  (400 MHz,  $\delta$  ppm/ $\text{CDCl}_3$ ): 6.92 (d,  $J = 2.0$  Hz, 1H), 6.83-6.76 (m, 2H), 4.26-4.12 (m, 2H), 3.87 (s, 3H), 3.86 (s, 3H), 3.65 (s, 1H), 3.08 (d,  $J = 14.4$  Hz, 1H), 2.79 (d,  $J = 14.0$  Hz, 1H), 2.46 (s, 3H), 1.17 (t,  $J = 7.2$  Hz, 3H). **HRMS** for  $\text{C}_{19}\text{H}_{21}\text{N}_2\text{O}_5^+$ : calcd.  $[\text{M}+\text{H}]^+$ : 357.1445, found: 357.1442.

**Compound 4e: ethyl 3,3-dicyano-5-(3,4-dichlorophenyl)-5-hydroxy-2-methylcyclopent-1-ene-1-carboxylate**

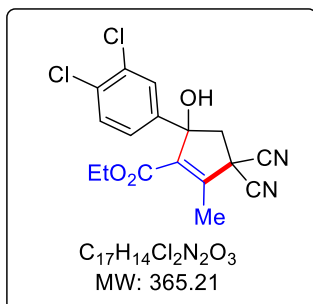

Following the general procedure, treatment of 2-(2-(3,4-dichlorophenyl)-2-oxoethyl)malononitrile **1g** (51 mg, 0.20 mmol) with ethyl buta-2,3-dienoate **2k** (45 mg, 0.40 mmol) in the presence of  $PBu_3$  (8 mg, 0.04 mmol) in  $CH_3CN$  (2 mL) at 25 °C for 12 h followed by column chromatography afforded the product **4e** as white solid (51 mg, 70%).  $R_f$ (EtOAc/Hexane : 2/8) = 0.15. **Mp** 125-127 °C.  $^{13}C$  NMR (100 MHz,  $\delta$  ppm/ $CDCl_3$ ): 163.5(C), 145.8 (C), 143.9 (C), 138.4 (C), 133.6 (C), 132.8 (C), 131.1 (CH), 126.9 (CH), 123.8 (CH), 113.6 (C), 113.5 (C), 85.5 (C), 62.3 ( $CH_2$ ), 50.7 (C), 42.7 ( $CH_2$ ), 14.1 ( $CH_3$ ), 14.0 ( $CH_3$ ).  $^1H$  NMR (400 MHz,  $\delta$  ppm/ $CDCl_3$ ): 7.51 (d,  $J$  = 2.4 Hz, 1H), 7.45-7.43 (m, 1H), 7.14-7.11 (m, 1H), 4.28-4.15 (m, 2H), 3.68 (s, 1H), 3.10 (d,  $J$  = 14.8 Hz, 1H), 2.74 (d,  $J$  = 14.4 Hz, 1H), 2.48 (s, 3H), 1.20 (t,  $J$  = 7.2 Hz, 3H). **HRMS** for  $C_{17}H_{15}Cl_2N_2O_3^+$ : calcd.  $[M+H]^+$ : 365.0454, found: 365.0450.

**Compound 4f: ethyl 3,3-dicyano-5-hydroxy-2-methyl-5-(naphthalen-2-yl)cyclopent-1-ene-1-carboxylate**

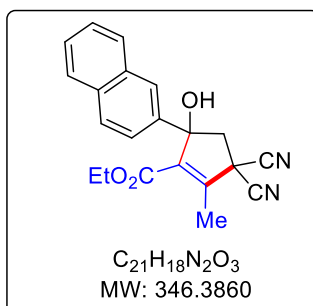

Following the general procedure, treatment of 2-(2-(naphthalen-2-yl)-2-oxoethyl)malononitrile **1h** (47 mg, 0.20 mmol) with ethyl buta-2,3-dienoate **2k** (45 mg, 0.40 mmol) in the presence of  $PBu_3$  (8 mg, 0.04 mmol) in  $CH_3CN$  (2 mL) at 25 °C for 12 h followed by column chromatography afforded the product **4f** as white solid (51 mg, 73%).  $R_f$ (EtOAc/Hexane : 2/8) = 0.15. **Mp** 134-136 °C.  $^{13}C$  NMR (100 MHz,  $\delta$  ppm/ $CDCl_3$ ): 163.7(C), 144.9 (C), 140.8 (C), 139.5 (C), 133.3 (C), 133.1 (C), 129.3 (CH), 128.4 (CH), 127.8 (CH), 126.9 (CH), 126.7 (CH), 123.5 (CH), 122.2 (CH), 113.9 (C), 113.9 (C), 86.5 (C), 62.0 ( $CH_2$ ), 51.0 (C), 42.9 ( $CH_2$ ), 14.0 ( $CH_3$ ), 13.9 ( $CH_3$ ).  $^1H$  NMR (400 MHz,  $\delta$  ppm/ $CDCl_3$ ): 7.87-7.83 (m, 4H), 7.54-7.49 (m, 2H), 7.40-7.38 (m, 1H), 4.20-4.09 (m, 2H), 3.75 (s, 1H), 3.17 (d,  $J$  = 11.6 Hz, 1H), 2.88 (d,  $J$  = 11.6 Hz, 1H), 2.52 (s, 3H), 1.09 (t,  $J$  = 5.8 Hz, 3H). **HRMS** for  $C_{21}H_{18}N_2NaO_3^+$ : calcd.  $[M+Na]^+$ : 369.1210, found: 369.1212.

**Compound 4g: ethyl 5-(4'-bromo-[1,1'-biphenyl]-4-yl)-3,3-dicyano-5-hydroxy-2-methylcyclopent-1-ene-1-carboxylate**

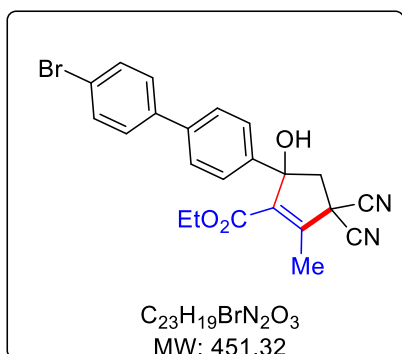

Following the general procedure, treatment of 2-(2-(4'-bromo-[1,1'-biphenyl]-4-yl)-2-oxoethyl)malononitrile **1o** (68 mg, 0.20 mmol) with ethyl buta-2,3-dienoate **2k** (45 mg, 0.40 mmol) in the presence of  $PBu_3$  (8 mg, 0.04 mmol) in  $CH_3CN$  (2 mL) at 25 °C for 12 h followed by column chromatography afforded the product **4g** as brown solid (77 mg, 85%).  $R_f$  (EtOAc/Hexane : 2/8) = 0.15.  $Mp$  156-158 °C.  $^{13}C$  NMR (100 MHz,  $\delta$  ppm/ $CDCl_3$ ): 163.7 (C), 145.0 (C), 143.0 (C), 140.2 (C), 139.3 (C), 139.3 (C), 132.1 (CH), 132.1 (CH), 128.8 (CH), 128.8 (CH), 127.6 (CH), 127.6 (CH), 125.0 (CH), 125.0 (CH), 122.1 (C), 113.8 (C), 113.8 (C), 86.2 (C), 62.0 ( $CH_2$ ), 51.0 (C), 42.8 ( $CH_2$ ), 14.1 ( $CH_3$ ), 13.9 ( $CH_3$ ).  $^1H$  NMR (400 MHz,  $\delta$  ppm/ $CDCl_3$ ): 7.57-7.54 (m, 4H), 7.45-7.40 (m, 4H), 4.29-4.11 (m, 2H), 3.68 (s, 1H), 3.14 (d,  $J$  = 14.0 Hz, 1H), 2.83 (d,  $J$  = 14.4 Hz, 1H), 2.49 (s, 3H), 1.17 (t,  $J$  = 7.2 Hz, 3H). HRMS for  $C_{23}H_{19}BrN_2NaO_3^+$ : calcd.  $[M+Na]^+$ : 473.0471, found: 473.0472.

**Compound 4h: ethyl 3,3-dicyano-5-(3,4-dihydro-2H-benzo [1,4]dioxepin-7-yl)-5-hydroxy-2-methylcyclopent-1-ene-1-carboxylate**

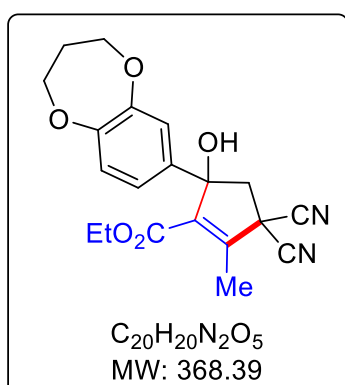

Following the general procedure, treatment of 2-(2-(3,4-dihydro-2H-benzo[1,4]dioxepin-7-yl)-2-oxoethyl)malononitrile **1j** (51 mg, 0.20 mmol) with ethyl buta-2,3-dienoate **2k** (45 mg, 0.40 mmol) in the presence of  $PBu_3$  (8 mg, 0.04 mmol) in  $CH_3CN$  (2 mL) at 25 °C for 12 h followed by column chromatography afforded the product **4h** as brown solid (52 mg, 71%).  $R_f$  (EtOAc/Hexane : 2/8) = 0.10.  $Mp$  146-148 °C.  $^{13}C$  NMR (100 MHz,  $\delta$  ppm/ $CDCl_3$ ): 163.7 (C), 151.4 (C), 151.0 (C), 144.6 (C), 139.3 (C), 138.8 (C), 122.1 (CH), 119.2 (CH), 117.9 (CH), 113.9 (C), 113.8 (C), 85.8 (C), 70.6 ( $CH_2$ ), 70.6 ( $CH_2$ ), 61.9 ( $CH_2$ ), 50.9 (C), 42.6 ( $CH_2$ ), 31.7 ( $CH_2$ ), 14.1 ( $CH_3$ ), 13.8 ( $CH_3$ ).  $^1H$  NMR (400 MHz,  $\delta$  ppm/ $CDCl_3$ ): 6.95-6.93 (m, 2H), 6.85-6.83 (m, 1H), 4.27-4.11 (m, 6H), 3.56 (s, 1H), 3.06 (d,  $J$  = 14.4 Hz, 1H), 2.76 (d,  $J$  = 14.0 Hz, 1H), 2.44 (s, 3H), 2.22-2.16 (m, 2H), 1.16 (t,  $J$  = 7.4 Hz, 3H). HRMS for  $C_{20}H_{20}N_2NaO_5^+$ : calcd.  $[M+Na]^+$ : 391.1264, found: 391.1264.



**Compound 4i: ethyl 3,3-dicyano-5-(furan-2-yl)-5-hydroxy-2-methylcyclopent-1-ene-1-carboxylate**

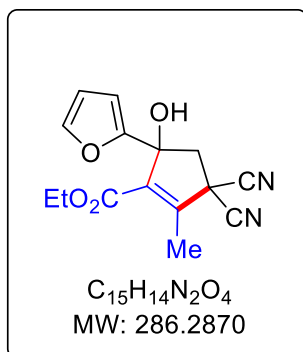

Following the general procedure, treatment of 2-(2-(furan-2-yl)-2-oxoethyl)malononitrile **1k** (35 mg, 0.20 mmol) with ethyl buta-2,3-dienoate **2k** (45 mg, 0.40 mmol) in the presence of  $PBu_3$  (8 mg, 0.04 mmol) in  $CH_3CN$  (2 mL) at 25 °C for 12 h followed by column chromatography afforded the product **4i** as white solid (44 mg, 77%).  $R_f$ (EtOAc/Hexane : 2/8) = 0.15. **Mp** 135-137 °C.  $^{13}C$  NMR (100 MHz,  $\delta$  ppm/ $CDCl_3$ ): 163.5(C), 154.2 (C), 145.0 (C), 142.9 (CH), 137.3 (C), 113.8 (C), 113.4 (C), 110.9 (CH), 106.9 (CH), 82.1 (C), 62.1 ( $CH_2$ ), 47.9 (C), 42.3 ( $CH_2$ ), 14.1 ( $CH_3$ ), 14.1 ( $CH_3$ ).  $^1H$  NMR (400 MHz,  $\delta$  ppm/ $CDCl_3$ ): 7.36-7.34 (m, 1H), 6.37-6.34 (m, 2H), 4.34-4.20 (m, 2H), 3.96 (s, 1H), 3.10 (d,  $J$  = 14.0 Hz, 1H), 2.98 (d,  $J$  = 14.4 Hz, 1H), 2.44 (s, 3H), 1.27 (t,  $J$  = 7.2 Hz, 3H). **HRMS** for  $C_{15}H_{15}N_2O_4^+$ : calcd.  $[M+H]^+$ : 287.1026, found: 287.1024.

**Compound 4j: benzyl 5-([1,1'-biphenyl]-4-yl)-3,3-dicyano-5-hydroxy-2-methylcyclopent-1-ene-1-carboxylate**

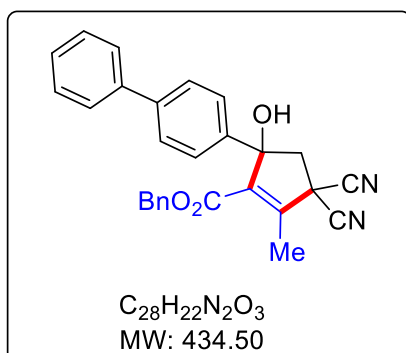

Following the general procedure, treatment of 2-(2-([1,1'-biphenyl]-4-yl)-2-oxoethyl)malononitrile **1l** (52 mg, 0.20 mmol) with benzyl buta-2,3-dienoate **2l** (70 mg, 0.40 mmol) in the presence of  $PBu_3$  (8 mg, 0.04 mmol) in  $CH_3CN$  (2 mL) at 25 °C for 12 h followed by column chromatography afforded the product **4j** as white solid (81 mg, 93%).  $R_f$ (EtOAc/Hexane : 2/8) = 0.15. **Mp** 155-157 °C.  $^{13}C$  NMR (100 MHz,  $\delta$  ppm/ $CDCl_3$ ): 163.4 (C), 145.7 (C), 142.4 (C), 141.4 (C), 140.3 (C), 139.2 (C), 134.4 (C), 129.0 (CH), 129.0 (CH), 128.8 (CH), 128.8 (CH), 128.8 (CH), 128.4 (CH), 128.4 (CH), 127.8 (CH), 127.8 (CH), 127.8 (CH), 127.2 (CH), 127.2 (CH), 124.8 (CH), 124.8 (CH), 113.8 (C), 113.8 (C), 86.1 (C), 67.6 ( $CH_2$ ), 51.0 (C), 42.8 ( $CH_2$ ), 13.9 ( $CH_3$ ).  $^1H$  NMR (400 MHz,  $\delta$  ppm/ $CDCl_3$ ): 7.59-7.56 (m, 4H), 7.48-7.43 (m, 2H), 7.39-7.34 (m, 3H), 7.26-7.20 (m, 3H), 7.02-7.00 (m, 2H), 5.22 (d,  $J$  = 12.0 Hz, 1H), 5.02 (d,  $J$  = 12.0 Hz, 1H), 3.56 (s, 1H), 3.12 (d,  $J$  = 14.4 Hz, 1H), 2.81 (d,  $J$  = 14.4 Hz, 1H), 2.47 (s, 3H). **HRMS** for  $C_{28}H_{23}N_2O_3^+$ : calcd.  $[M+H]^+$ : 435.1703, found: 435.1680

**Compound 4k:** *tert*-butyl 5-([1,1'-biphenyl]-4-yl)-3,3-dicyano-5-hydroxy-2-methylcyclopent-1-ene-1-carboxylate

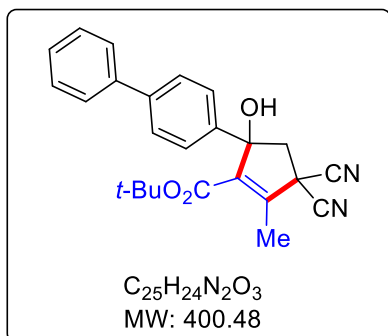

Following the general procedure, treatment of 2-(2-([1,1'-biphenyl]-4-yl)-2-oxoethyl)malononitrile **1l** (52 mg, 0.20 mmol) with *tert*-butyl buta-2,3-dienoate **2m** (56 mg, 0.40 mmol) in the presence of  $PBu_3$  (8 mg, 0.04 mmol) in  $CH_3CN$  (2 mL) at 25 °C for 12 h followed by column chromatography afforded the product **4k** as white solid (63 mg, 79%).  $R_f$  (EtOAc/Hexane : 2/8) = 0.15. **Mp** 156-158 °C.  $^{13}C$  NMR (100 MHz,  $\delta$  ppm/ $CDCl_3$ ): 162.7 (C), 144.0 (C), 142.8 (C), 141.3 (C), 140.8 (C), 140.4 (C), 129.0 (CH), 129.0 (CH), 127.8 (CH), 127.6 (CH), 127.6 (CH), 127.2 (CH), 127.2 (CH), 124.9 (CH), 124.9 (CH), 114.0 (C), 114.0 (C), 86.1 (C), 84.2 (C), 50.9 (C), 42.7 ( $CH_2$ ), 28.0 ( $CH_3$ ), 28.0 ( $CH_3$ ), 28.0 ( $CH_3$ ), 13.5 ( $CH_3$ ).  $^1H$  NMR (400 MHz,  $\delta$  ppm/ $CDCl_3$ ): 7.63-7.58 (m, 4H), 7.47-7.35 (m, 5H), 3.56 (s, 1H), 3.15 (d,  $J$  = 14.4 Hz, 1H), 2.80 (d,  $J$  = 14.4 Hz, 1H), 2.46 (s, 3H), 1.31 (s, 9H). **HRMS** for  $C_{25}H_{24}N_2NaO_3^+$ : calcd.  $[M+Na]^+$ : 423.1679, found: 423.1672.

## Mechanistic Experiments

### Reaction of 2-benzylmalononitrile with $\gamma$ -substituted allenic ester

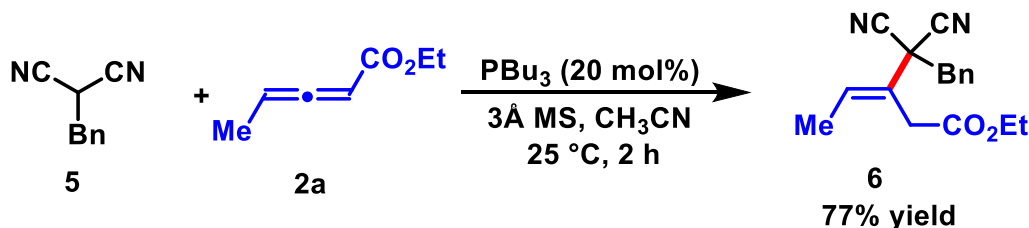

An oven-dried 10 mL Schlenk tube equipped with a magnetic stir bar was charged with 2-benzylmalononitrile **5** (31 mg, 0.20 mmol) and 3 Å MS (100 mg). Subsequently, it was sealed, evacuated, and backfilled with nitrogen. Freshly distilled  $CH_3CN$  (2.0 mL) and ethyl penta-2,3-dienoate **2a** (50 mg, 0.40 mmol) were added via syringe followed by the addition of  $PBu_3$  (8 mg, 0.04 mmol). The reaction mixture was stirred at 25 °C for 12 h. After the completion of the reaction, as indicated by TLC, the solvent was evaporated under reduced pressure. The residue was purified using column chromatography to afford the product **6** as colorless oil (43 mg, 77%).  $R_f$  (EtOAc/Hexane : 1/9) = 0.40.  $^{13}C$  NMR (100 MHz,  $\delta$  ppm/ $CDCl_3$ ): 169.3 (C), 132.6 (CH), 132.0 (C), 130.5 (CH), 130.5 (CH), 128.9 (CH), 128.9 (CH), 128.9 (CH), 124.1 (C), 114.2 (C), 114.2 (C), 61.7 ( $CH_2$ ), 46.2 (C), 44.3 ( $CH_2$ ), 33.8 ( $CH_2$ ), 14.4 ( $CH_3$ ), 14.2 ( $CH_3$ ).  $^1H$  NMR (400 MHz,  $\delta$  ppm/ $CDCl_3$ ): 7.38-7.36 (m, 5H), 6.24 (q,  $J$  = 9.6 Hz, 1H), 4.21 (q,  $J$  = 9.6 Hz, 2H), 3.33 (s, 2H), 3.32 (s, 2H), 1.76 (d,  $J$  = 9.2 Hz, 3H), 1.29 (t,  $J$  = 9.4 Hz, 3H). **HRMS** for  $C_{17}H_{19}N_2O_2^+$ : calcd.  $[M+H]^+$ : 283.1441, found: 283.1444.

Reaction of 2-benzylmalononitrile with unsubstituted allenic ester

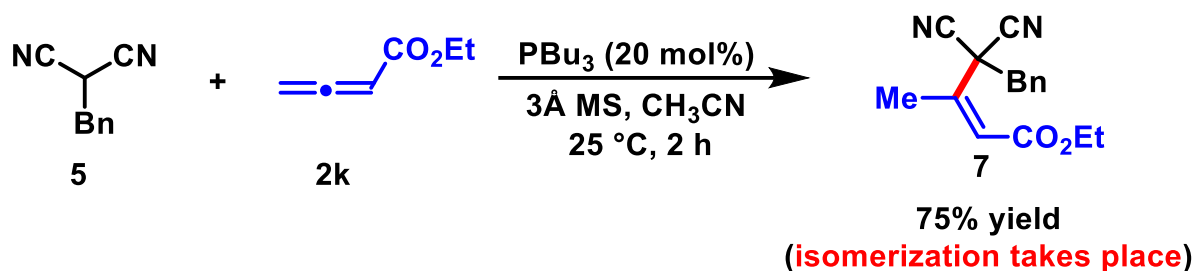

Following the above mentioned procedure, treatment of 2-benzylmalononitrile **5** (31 mg, 0.20 mmol) with ethyl buta-2,3-dienoate **2k** (45 mg, 0.40 mmol) in the presence of  $\text{PBu}_3$  (8 mg, 0.04 mmol) in  $\text{CH}_3\text{CN}$  (2 mL) at 25 °C for 2 h followed by column chromatography afforded the product **7** as colorless oil (40 mg, 75%).  $R_f$ (EtOAc/Hexane : 1/9) = 0.45.  $^{13}\text{C NMR}$  (100 MHz,  $\delta$  ppm/ $\text{CDCl}_3$ ): 164.6 (C), 144.6 (C), 131.2 (C), 134.4 (CH), 134.4 (CH), 129.2 (CH), 129.1 (CH), 129.1 (CH), 122.3 (CH), 113.3 (C), 113.3 (C), 61.0 ( $\text{CH}_2$ ), 47.0 (C), 43.8 ( $\text{CH}_2$ ), 15.7 ( $\text{CH}_3$ ), 14.2 ( $\text{CH}_3$ ).  $^1\text{H NMR}$  (400 MHz,  $\delta$  ppm/ $\text{CDCl}_3$ ): 7.41-7.39 (m, 3H), 7.35-7.32 (m, 2H), 6.20 (q,  $J = 1.4$  Hz, 1H), 4.21 (q,  $J = 7.2$  Hz, 2H), 3.33 (s, 2H), 2.41 (d,  $J = 1.2$  Hz, 3H), 1.29 (t,  $J = 7.6$  Hz, 3H). **HRMS** for  $\text{C}_{16}\text{H}_{17}\text{N}_2\text{O}_2^+$ : calcd.  $[\text{M}+\text{H}]^+$ : 269.1285, found: 269.1284.

### X-Ray Data Collection and Structure Refinement Details for compound **3a**:

A good quality single crystal of size 0.33 x 0.21 x 0.15 mm, was selected under a polarizing microscope and was mounted on a glass fiber for data collection. Single crystal X-ray data for compound **3a** were collected on the Bruker APEX-II CCD area-detector at 100(2) K. Data collection was performed using  $\omega$ -scans of at 100(2) K by Bruker APEX2<sup>1</sup>. Cell determination, and data reduction was performed using the Bruker SAINT software. Structure solution and refinement were performed by using SHELX-97<sup>2</sup>. Refinement of coordinates and anisotropic thermal parameters of non-hydrogen atoms were carried out by the full-matrix least-squares method. The hydrogen atoms attached to carbon atoms were generated with idealized geometries and isotropically refined using a riding model.

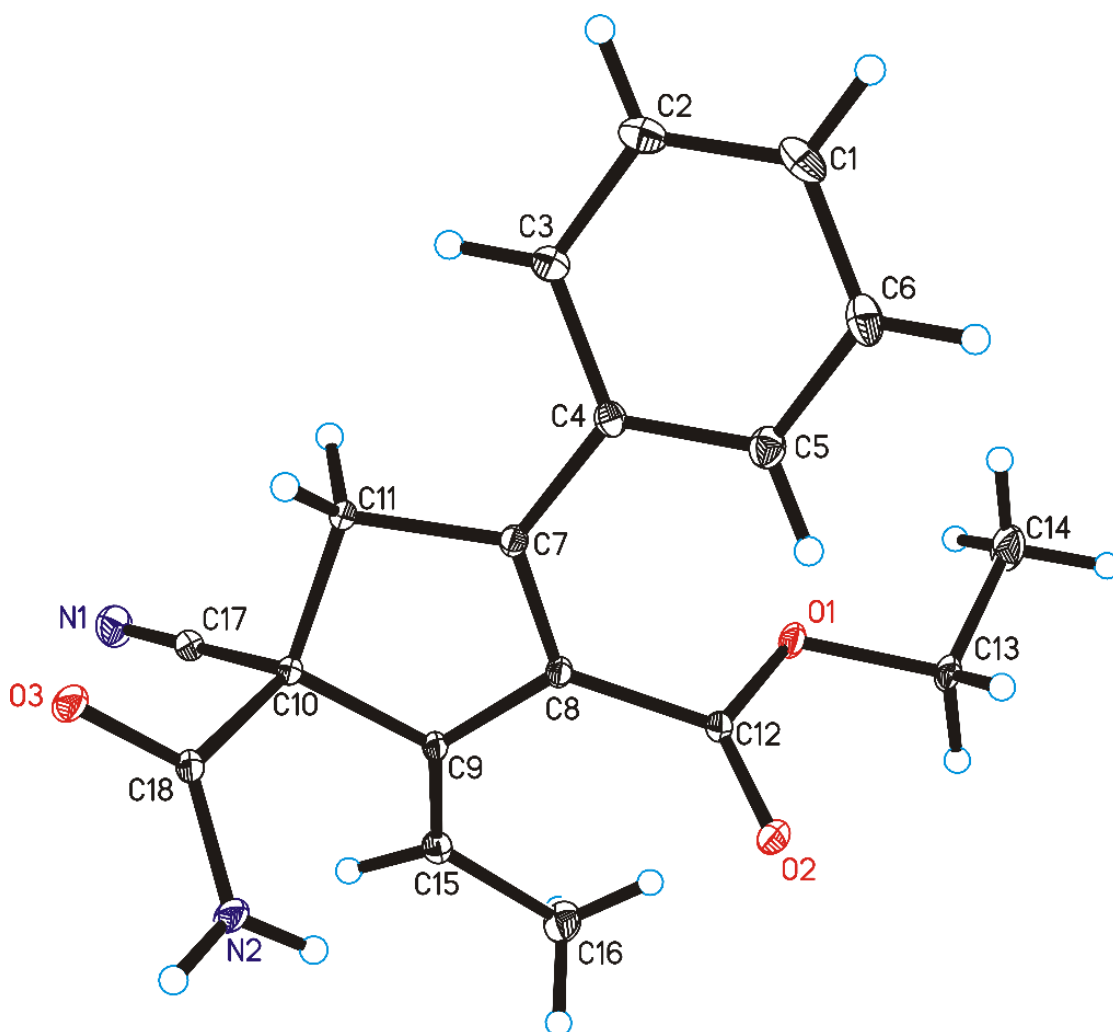

**Figure S1.** ORTEP diagram drawn with 30% ellipsoid probability for non-H atoms of the crystal structure of compound **3a** determined at 293 K.

**Table S1** Crystal data and structure refinement details for **3a**.

| Compound                                                                 | 3a                                                            |
|--------------------------------------------------------------------------|---------------------------------------------------------------|
| Empirical formula                                                        | C <sub>18</sub> H <sub>18</sub> N <sub>2</sub> O <sub>3</sub> |
| Formula weight                                                           | 310.34                                                        |
| Crystal System                                                           | Triclinic                                                     |
| Space group                                                              | <i>P</i> -1                                                   |
| <i>a</i> (Å)                                                             | 7.6107(6)                                                     |
| <i>b</i> (Å)                                                             | 9.6669(8)                                                     |
| <i>c</i> (Å)                                                             | 11.6421(10)                                                   |
| $\alpha$ (°)                                                             | 74.194(2)                                                     |
| $\beta$ (°)                                                              | 82.375(2)                                                     |
| $\gamma$ (°)                                                             | 75.798(2)                                                     |
| <i>V</i> (Å <sup>3</sup> )                                               | 796.96(11)                                                    |
| <i>Z</i>                                                                 | 2                                                             |
| <i>D</i> <sub>c</sub> (g/cm <sup>3</sup> )                               | 1.293                                                         |
| <i>F</i> <sub>000</sub>                                                  | 328                                                           |
| $\mu$ (mm <sup>-1</sup> )                                                | 0.089                                                         |
| $\theta_{\max}$ (°)                                                      | 28.34                                                         |
| Total reflections                                                        | 12550                                                         |
| Unique reflections                                                       | 3943                                                          |
| Reflections [ <i>I</i> > 2 $\sigma$ ( <i>I</i> )]                        | 3520                                                          |
| Parameters                                                               | 210                                                           |
| <i>R</i> <sub>int</sub>                                                  | 0.0294                                                        |
| Goodness-of-fit                                                          | 1.132                                                         |
| <i>R</i> [ <i>F</i> <sup>2</sup> > 2 $\sigma$ ( <i>F</i> <sup>2</sup> )] | 0.0420                                                        |
| <i>wR</i> ( <i>F</i> <sup>2</sup> , all data)                            | 0.1272                                                        |
| CCDC No.                                                                 | 2006551                                                       |

**X-Ray Data Collection and Structure Refinement Details for compound 4b:**

A good quality single crystal of size 0.29 x 0.17 x 0.12 mm, was selected under a polarizing microscope and was mounted on a glass fiber for data collection. Single crystal X-ray data for compound **4b** were collected on the Bruker APEX-II CCD area-detector at 100(2) K. Data collection was performed using  $\omega$ -scans of at 100(2) K by Bruker APEX2<sup>1</sup>. Cell determination, and data reduction was performed using the Bruker SAINT software. Structure solution and refinement were performed by using SHELX-97<sup>2</sup>. Refinement of coordinates and anisotropic thermal parameters of non-hydrogen atoms were carried out by the full-matrix least-squares method. The hydrogen atoms attached to carbon atoms were generated with idealized geometries and isotropically refined using a riding model.

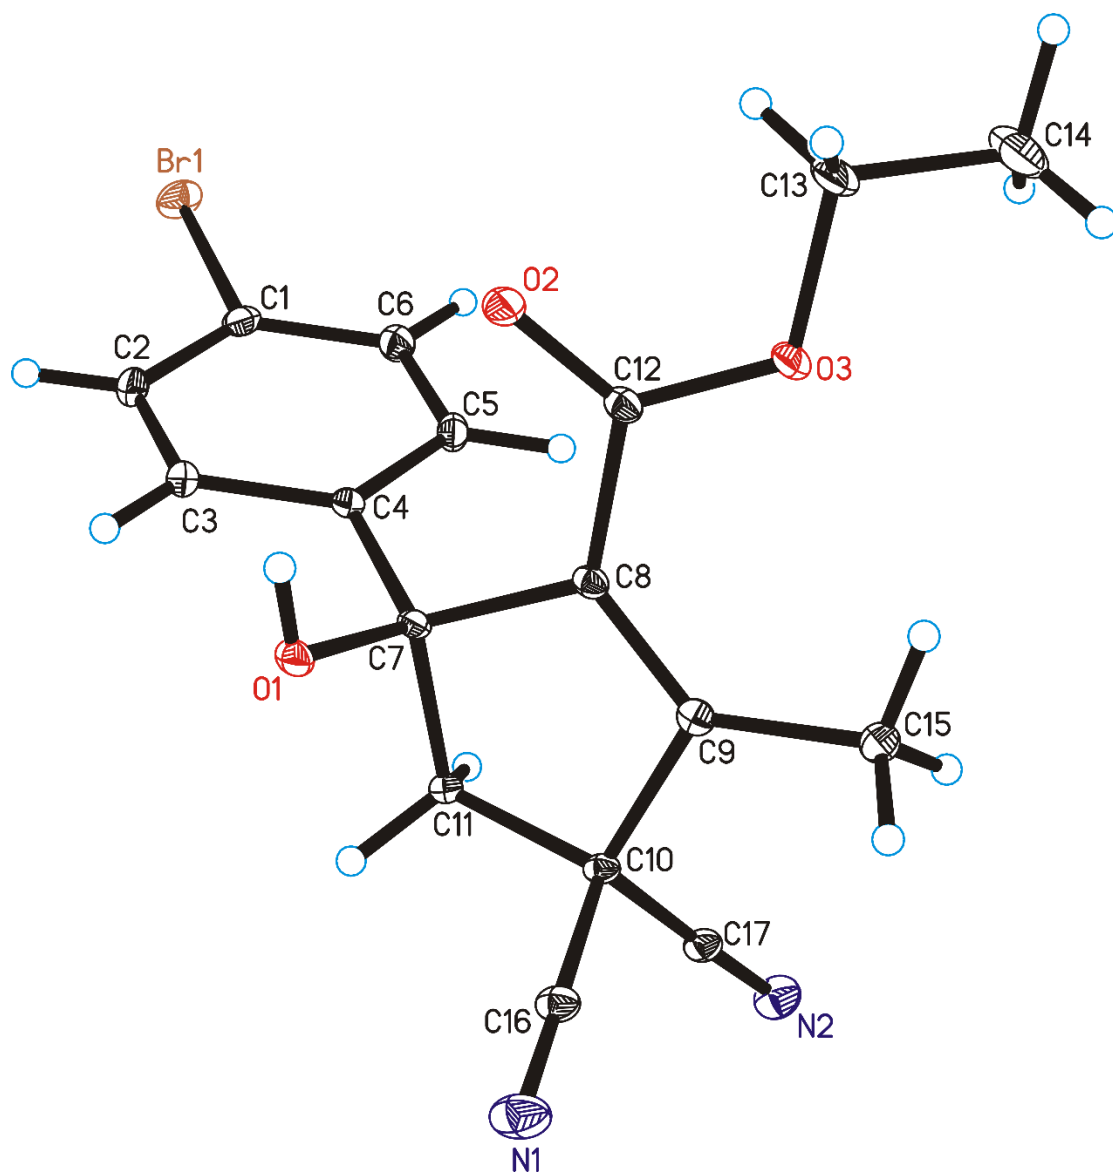

**Figure S2.** ORTEP diagram drawn with 30% ellipsoid probability for non-H atoms of the crystal structure of compound **4b** determined at 293 K.

**Table S2** Crystal data and structure refinement details for **4b**.

| Compound                                                                 | <b>4b</b>                                                        |
|--------------------------------------------------------------------------|------------------------------------------------------------------|
| Empirical formula                                                        | C <sub>17</sub> H <sub>15</sub> Br N <sub>2</sub> O <sub>3</sub> |
| Formula weight                                                           | 375.22                                                           |
| Crystal System                                                           | Monoclinic                                                       |
| Space group                                                              | C 2/c                                                            |
| <i>a</i> (Å)                                                             | 24.827(6)                                                        |
| <i>b</i> (Å)                                                             | 6.5559(16)                                                       |
| <i>c</i> (Å)                                                             | 21.173(5)                                                        |
| $\alpha$ (°)                                                             | 90.00                                                            |
| $\beta$ (°)                                                              | 107.267(6)                                                       |
| $\gamma$ (°)                                                             | 90.00                                                            |
| <i>V</i> (Å <sup>3</sup> )                                               | 3291.0(13)                                                       |
| <i>Z</i>                                                                 | 8                                                                |
| <i>D<sub>c</sub></i> (g/cm <sup>3</sup> )                                | 1.515                                                            |
| <i>F</i> <sub>000</sub>                                                  | 1520                                                             |
| $\mu$ (mm <sup>-1</sup> )                                                | 2.514                                                            |
| $\theta_{\max}$ (°)                                                      | 28.43                                                            |
| Total reflections                                                        | 22762                                                            |
| Unique reflections                                                       | 4131                                                             |
| Reflections [ <i>I</i> > 2 $\sigma$ ( <i>I</i> )]                        | 3626                                                             |
| Parameters                                                               | 211                                                              |
| <i>R</i> <sub>int</sub>                                                  | 0.0578                                                           |
| Goodness-of-fit                                                          | 1.066                                                            |
| <i>R</i> [ <i>F</i> <sup>2</sup> > 2 $\sigma$ ( <i>F</i> <sup>2</sup> )] | 0.0316                                                           |
| <i>wR</i> ( <i>F</i> <sup>2</sup> , all data)                            | 0.0775                                                           |
| CCDC No.                                                                 | 2006837                                                          |

1. CrystalClear 2.1, Rigaku Corporation, Tokyo, Japan
2. Sheldrick, G. M. *Acta Crystallogr., Sect. A* **2008**, *64*, 112–122.

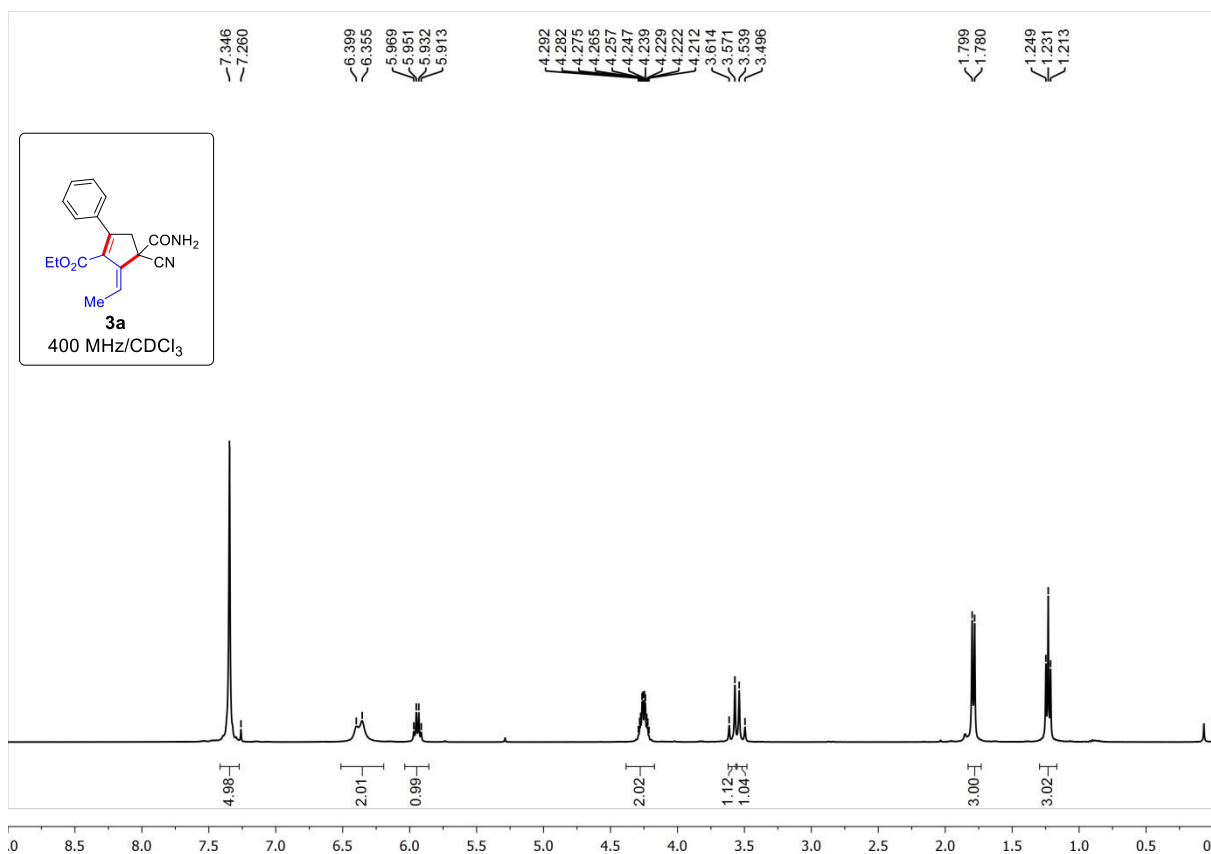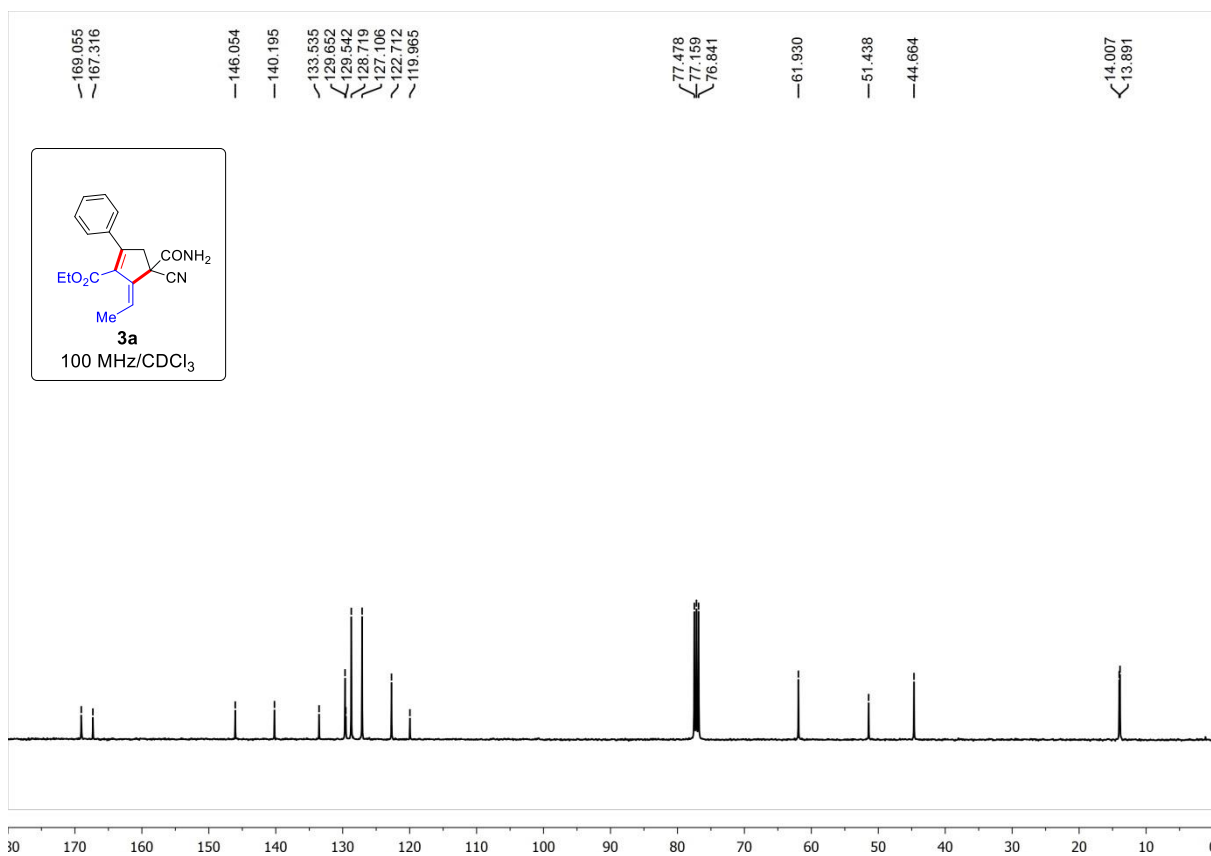



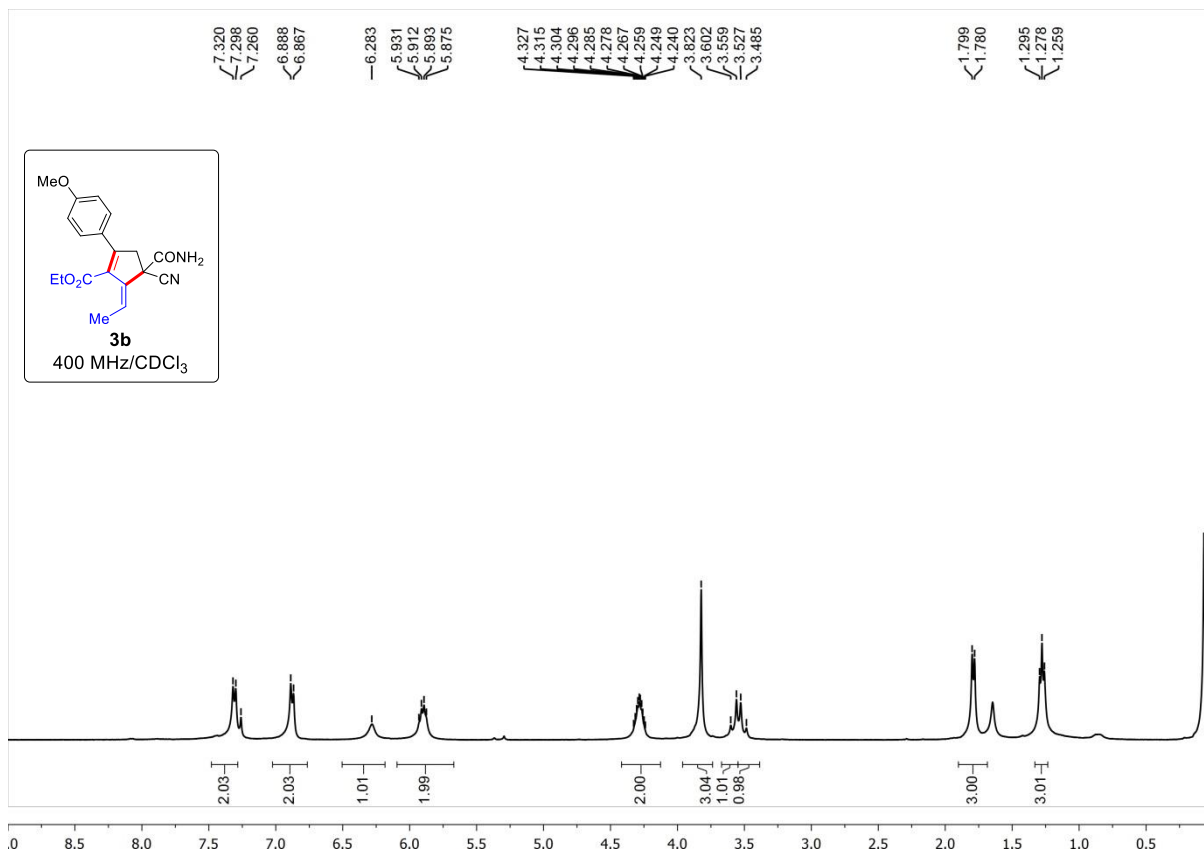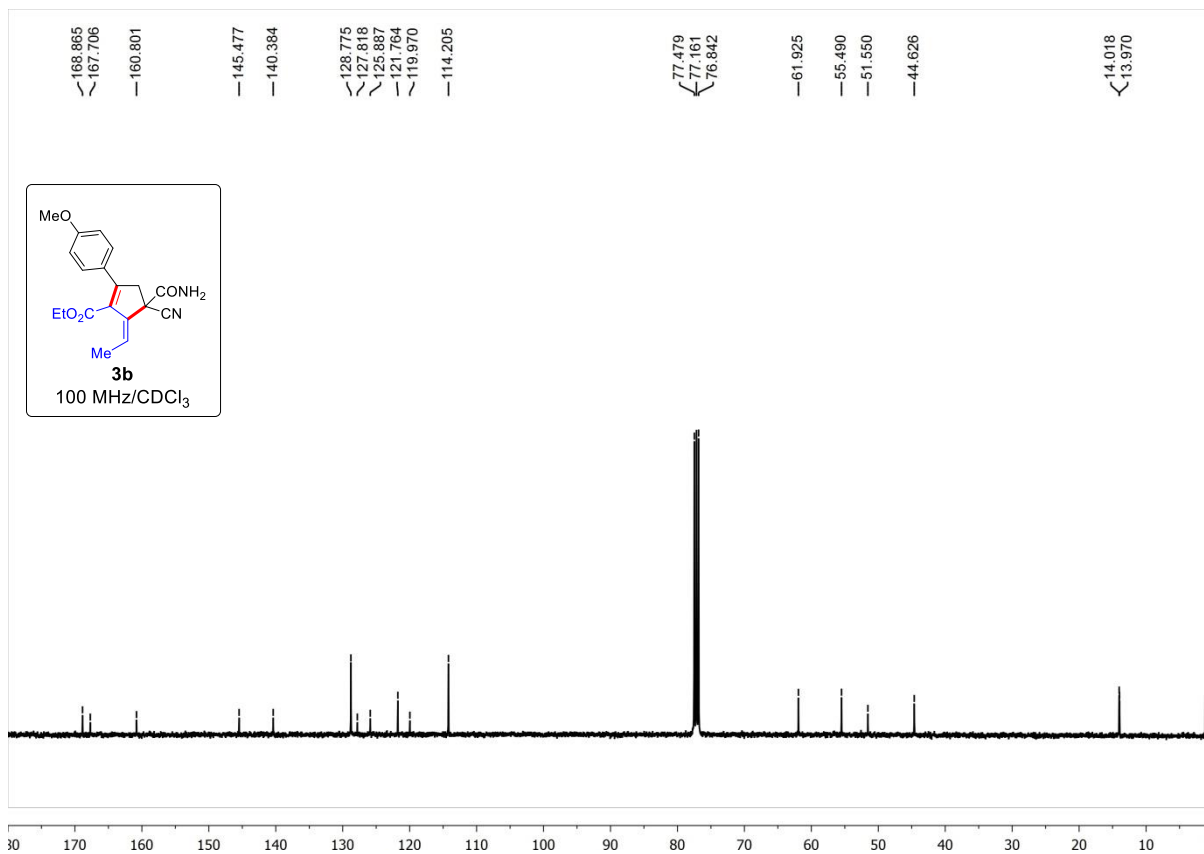

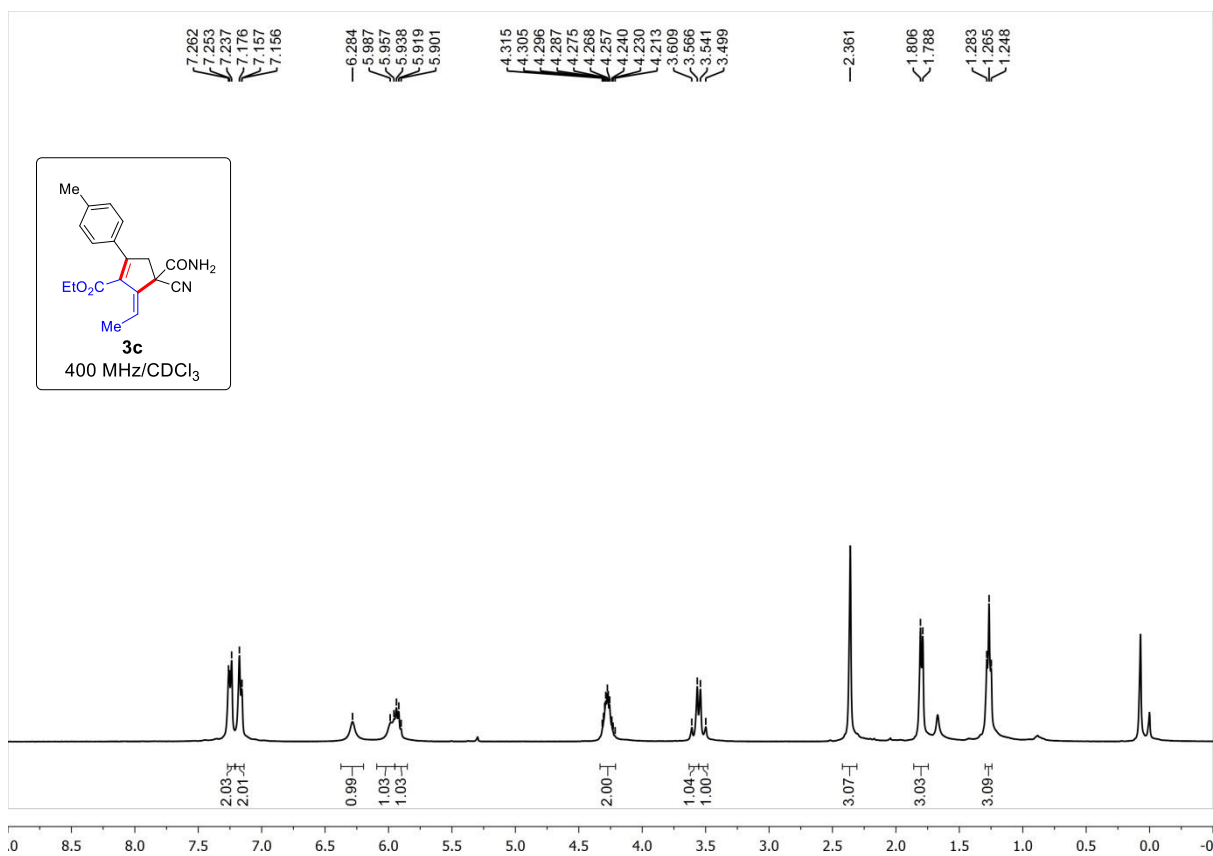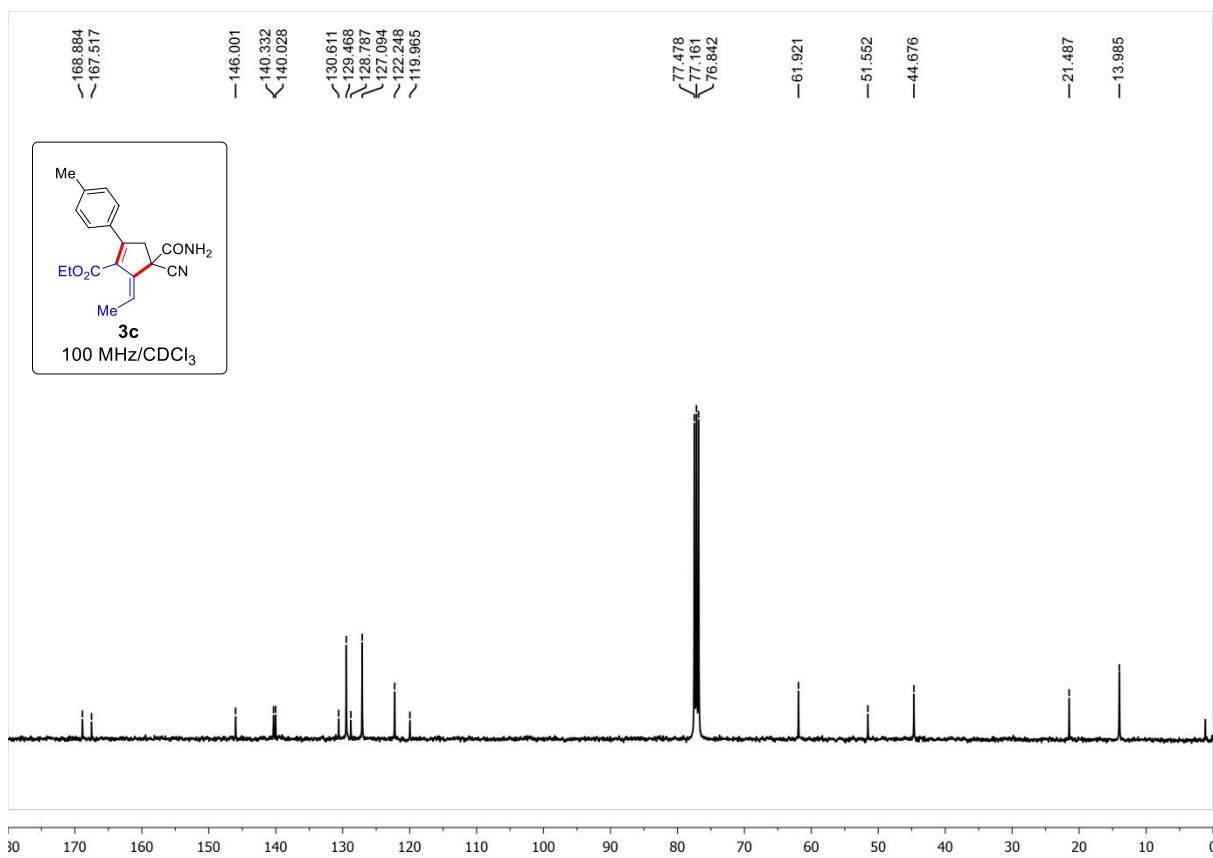

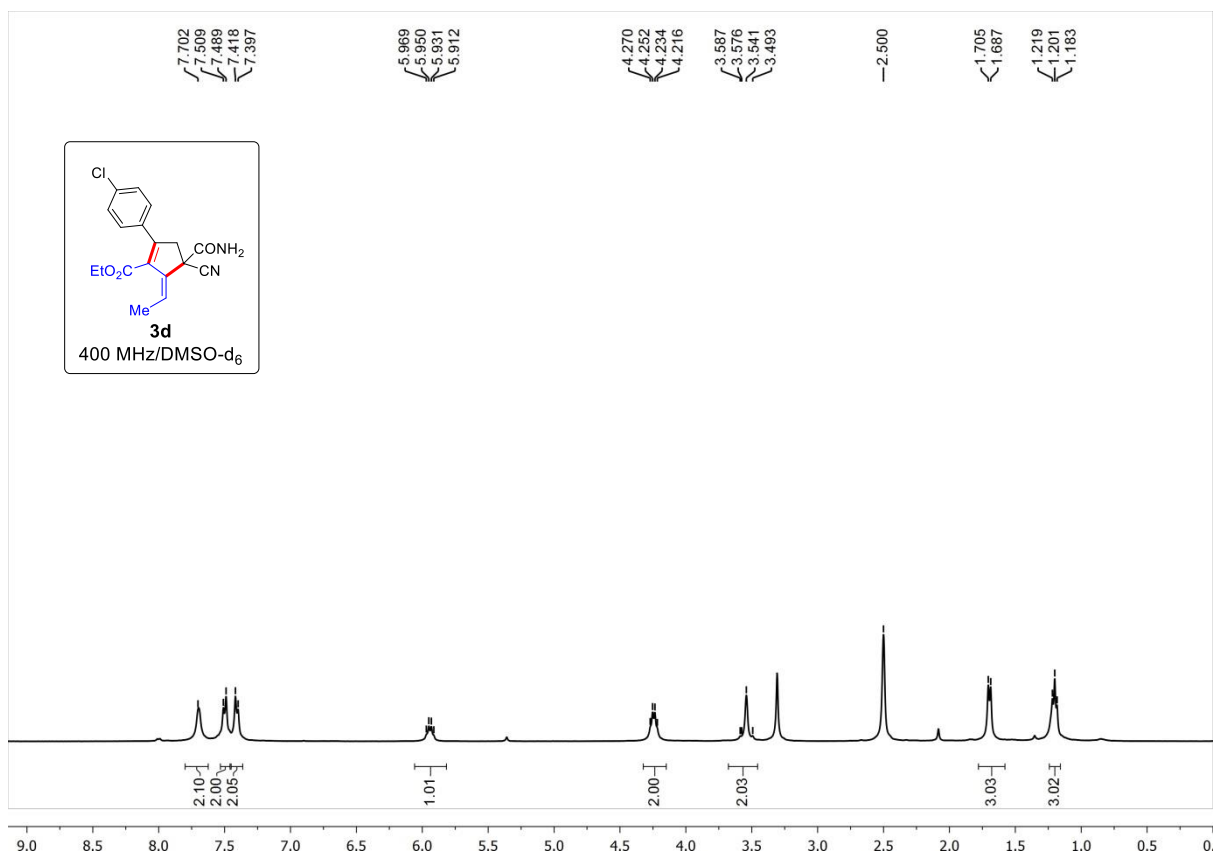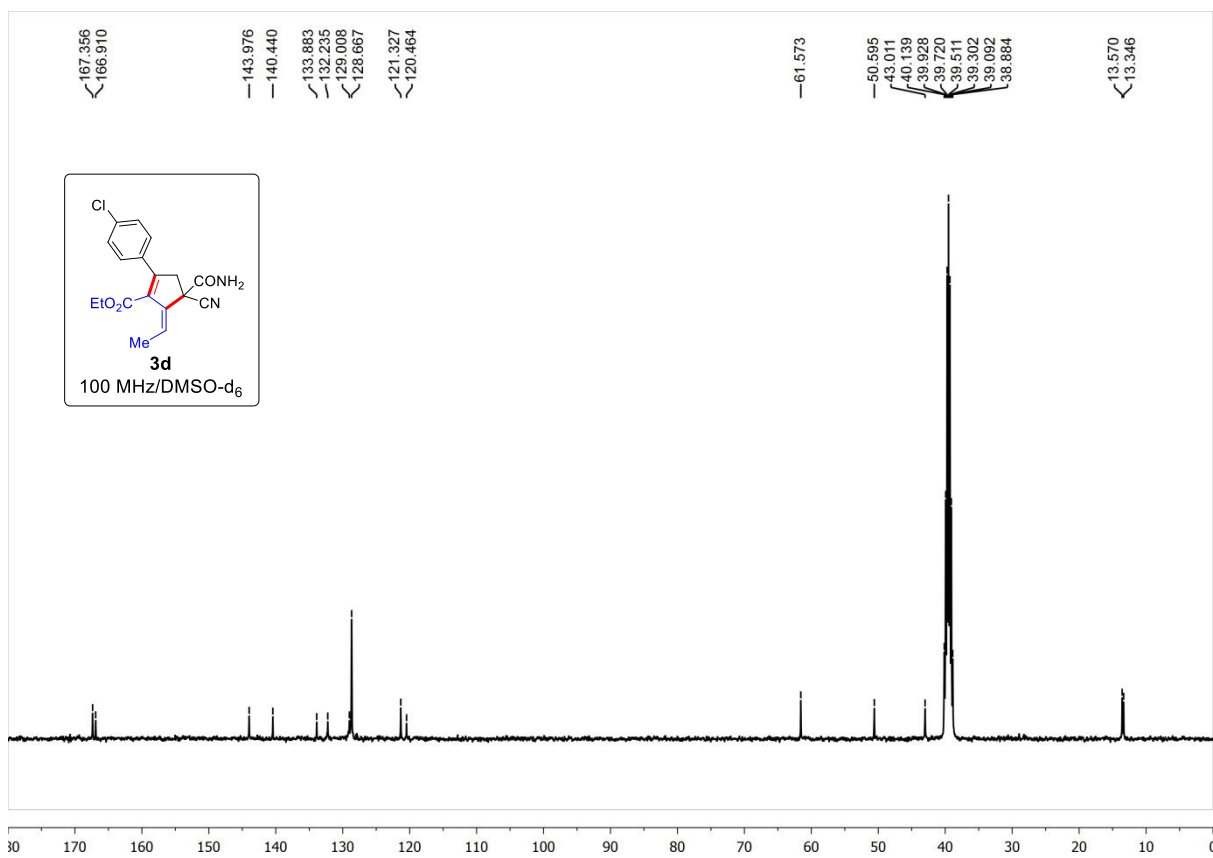

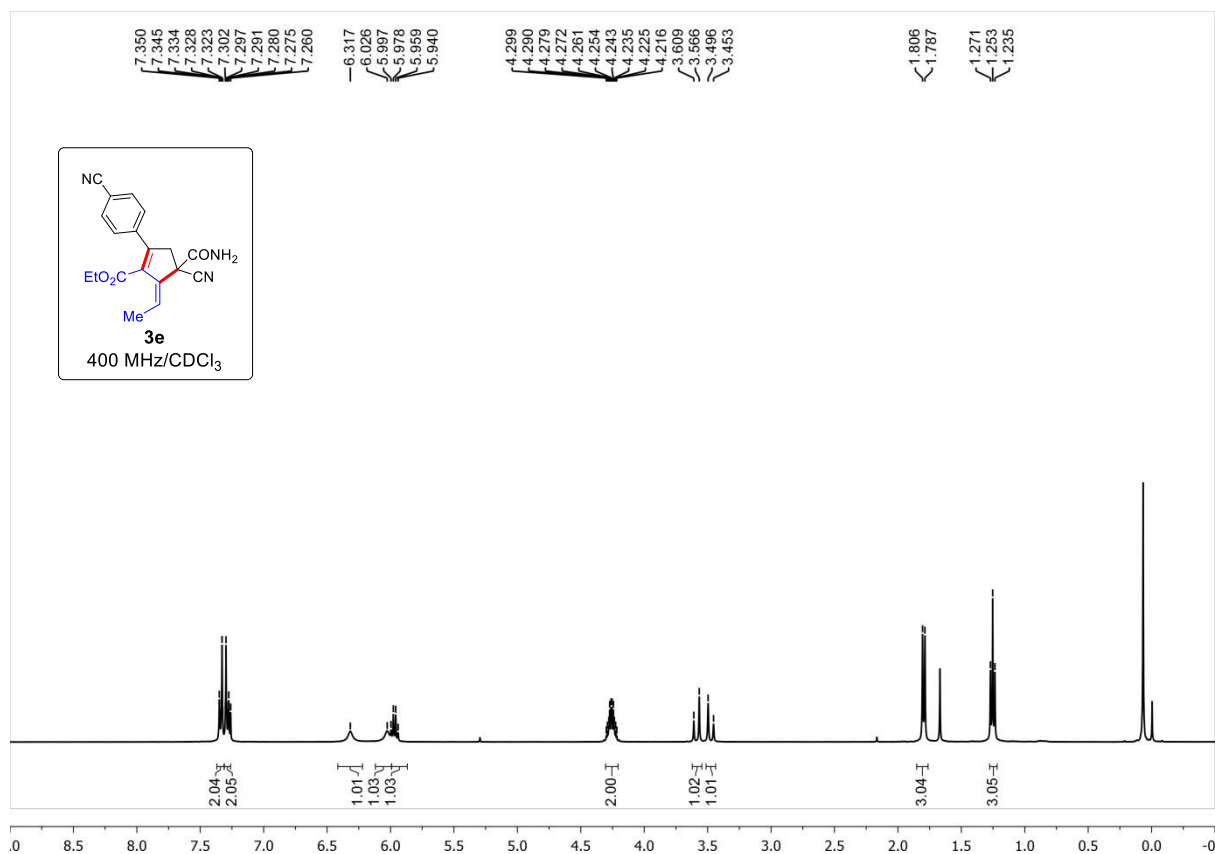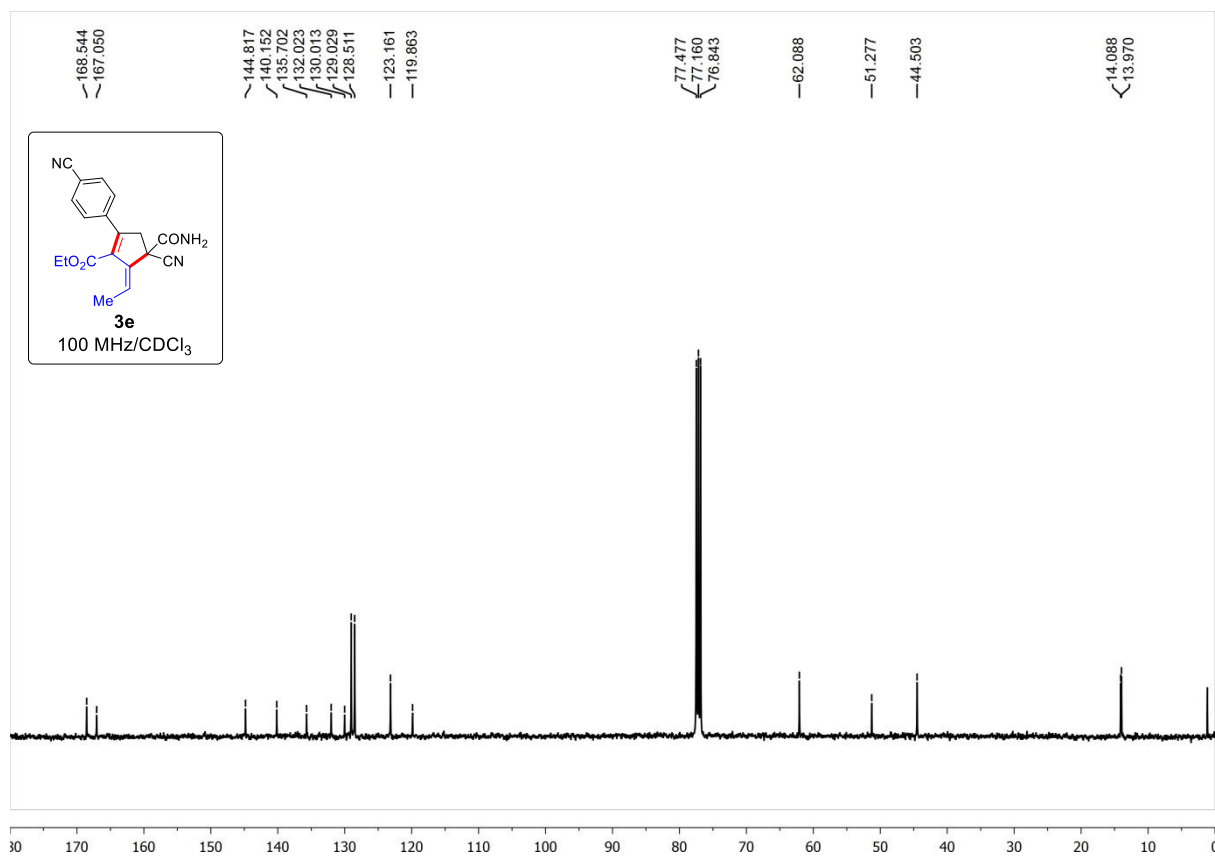

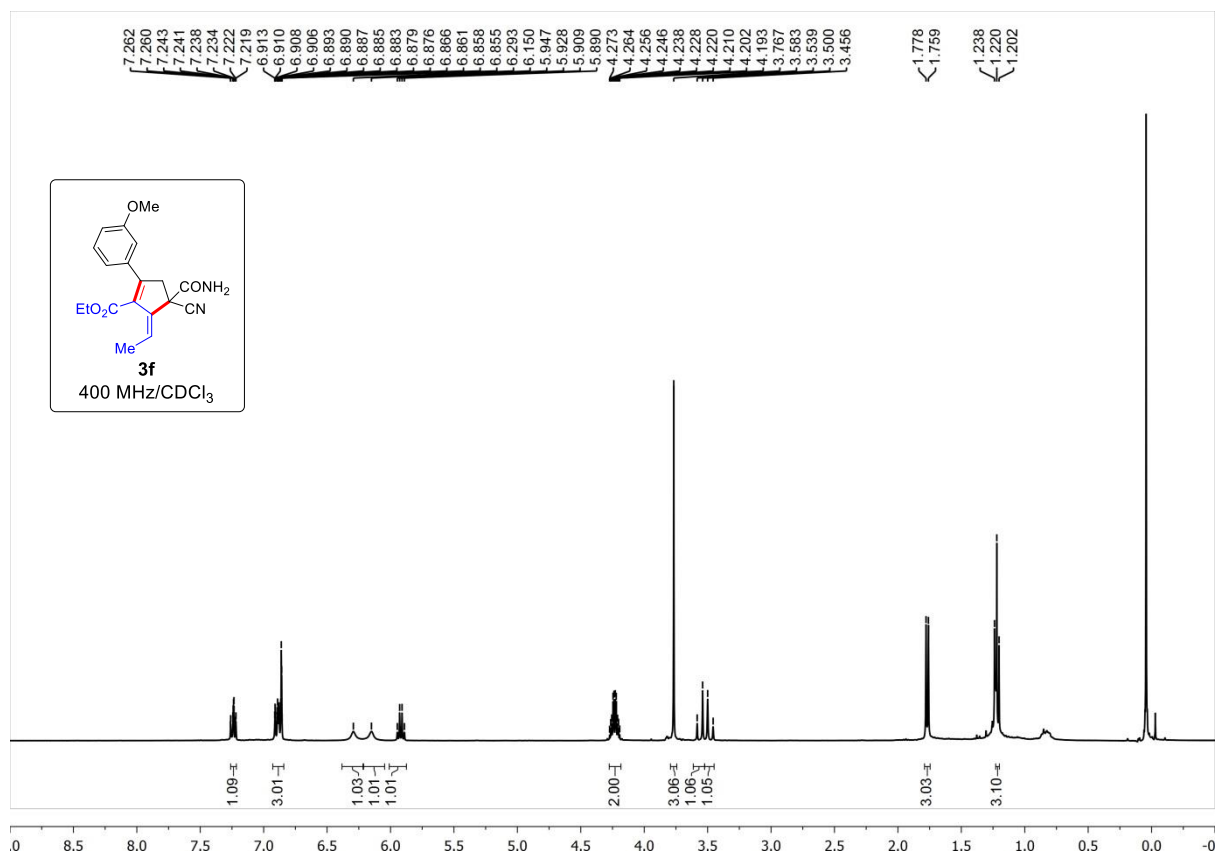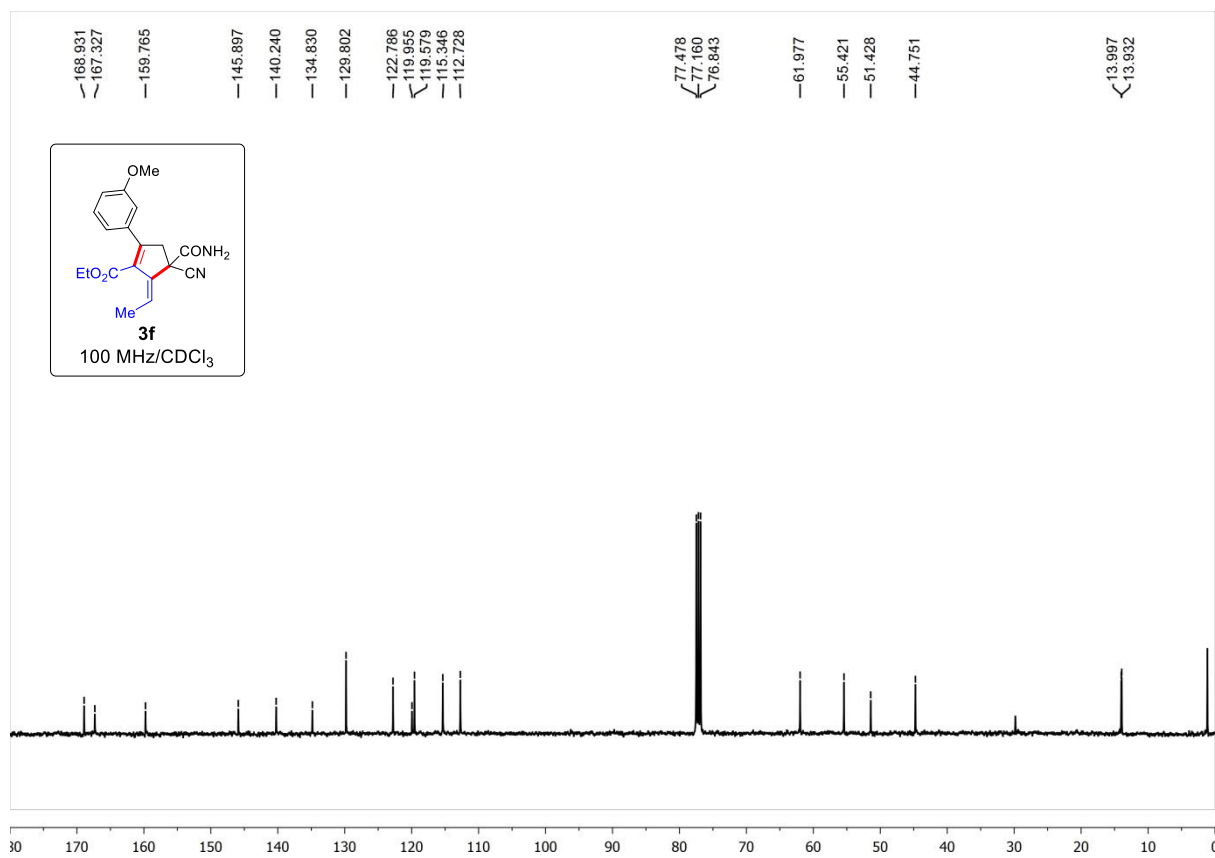

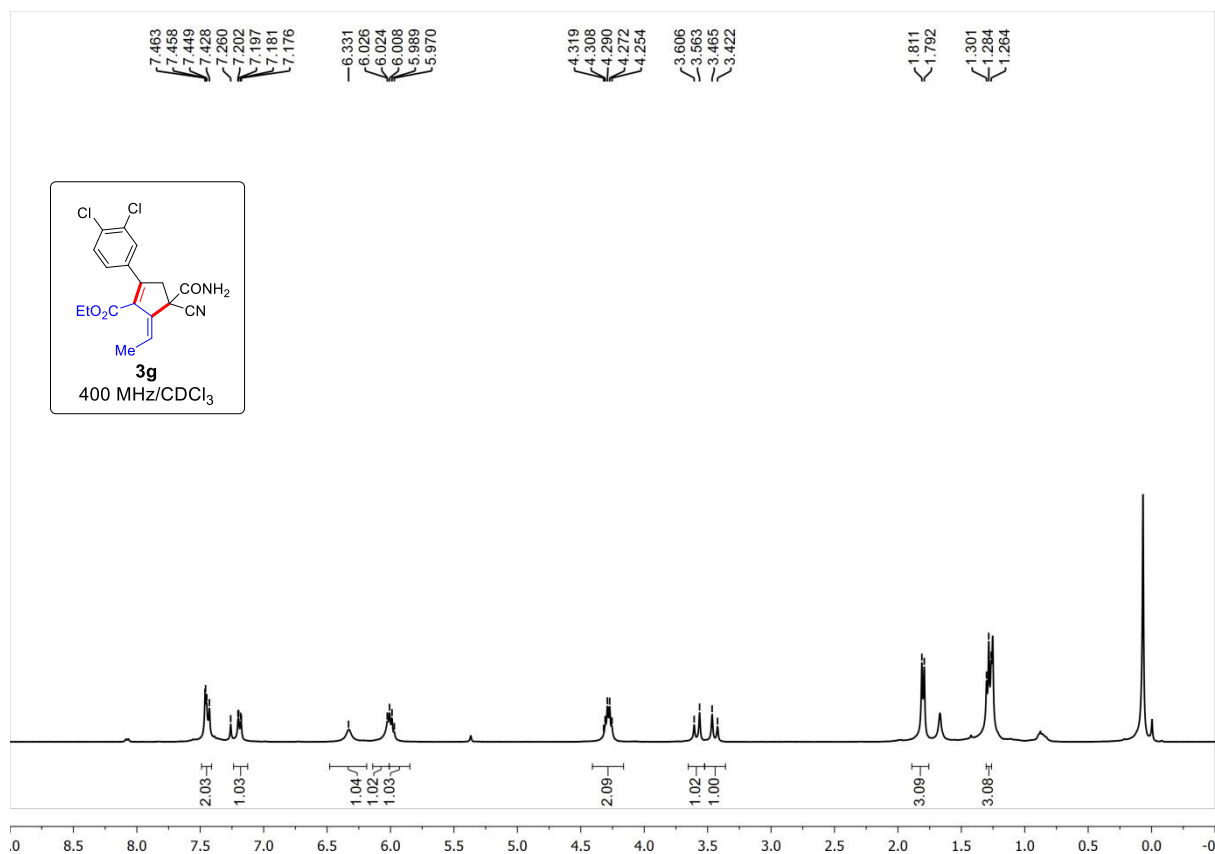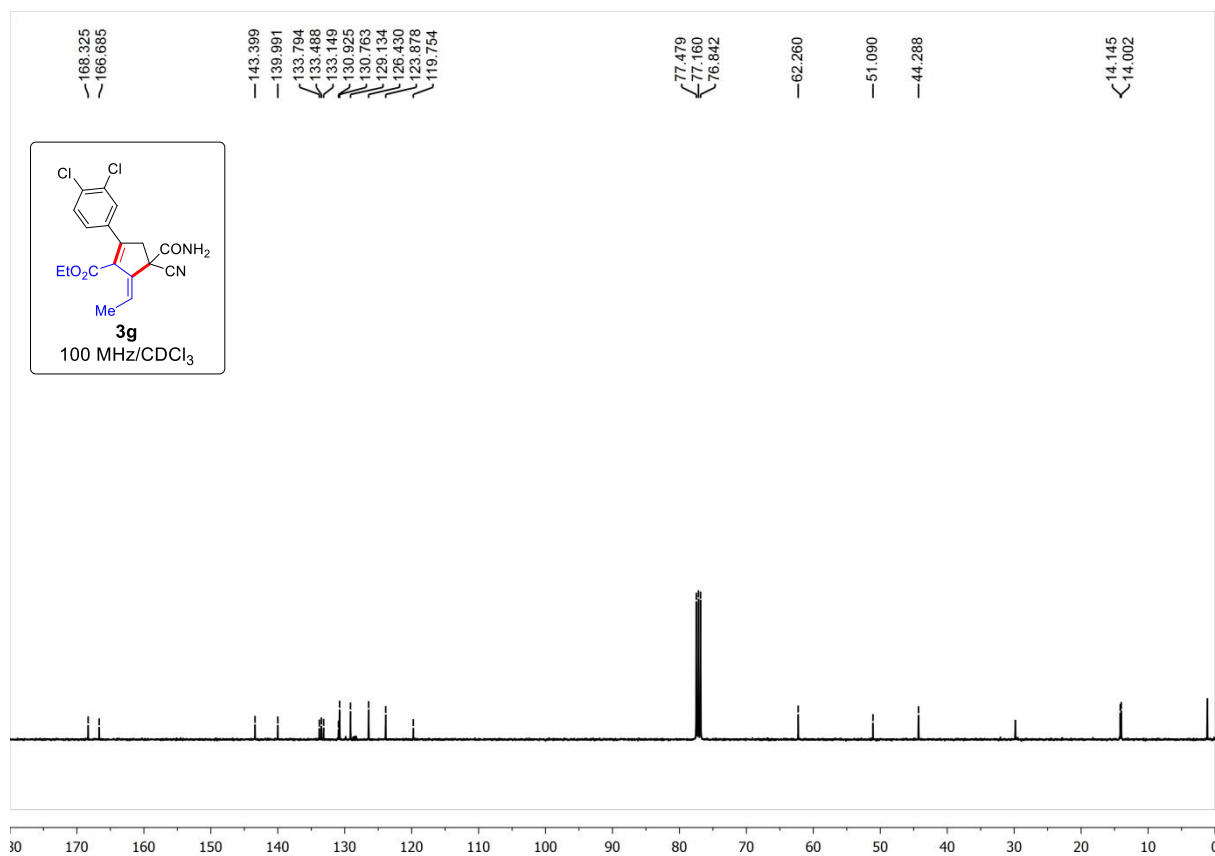

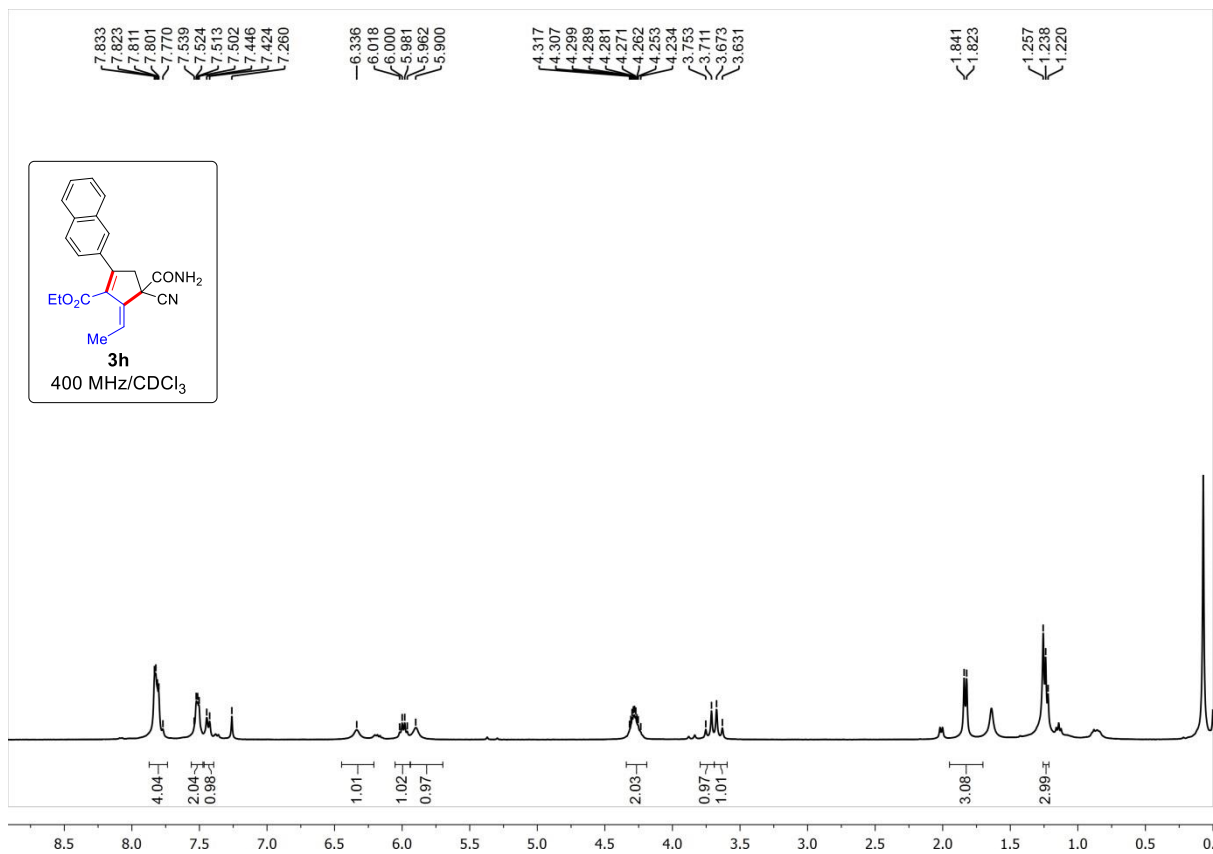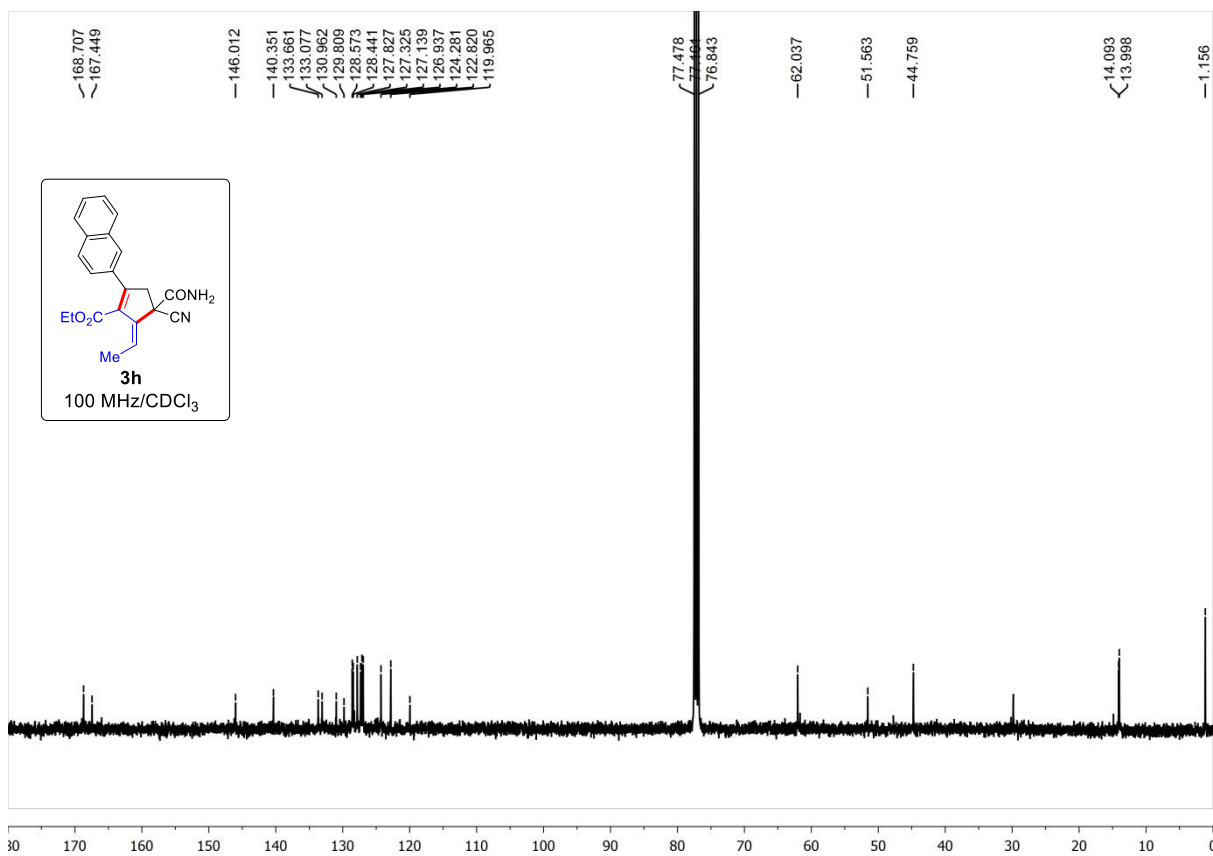

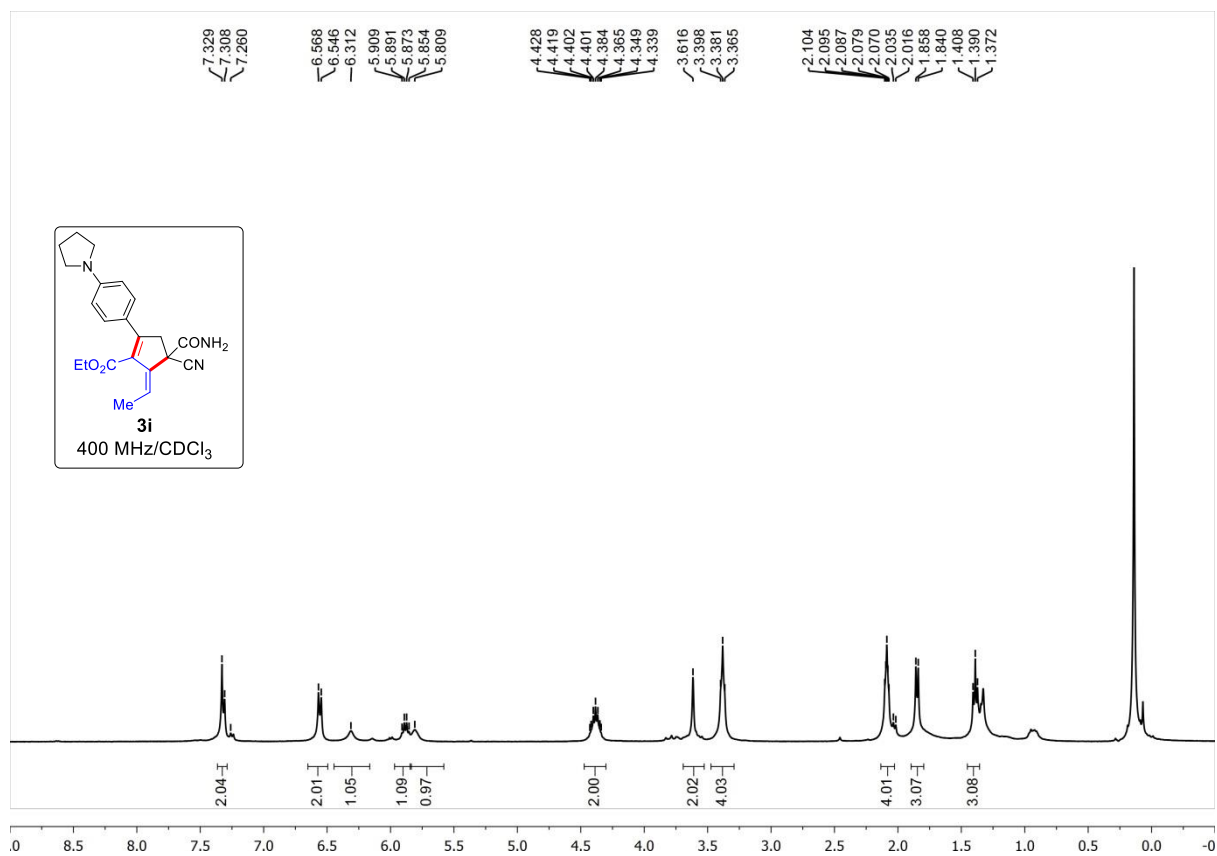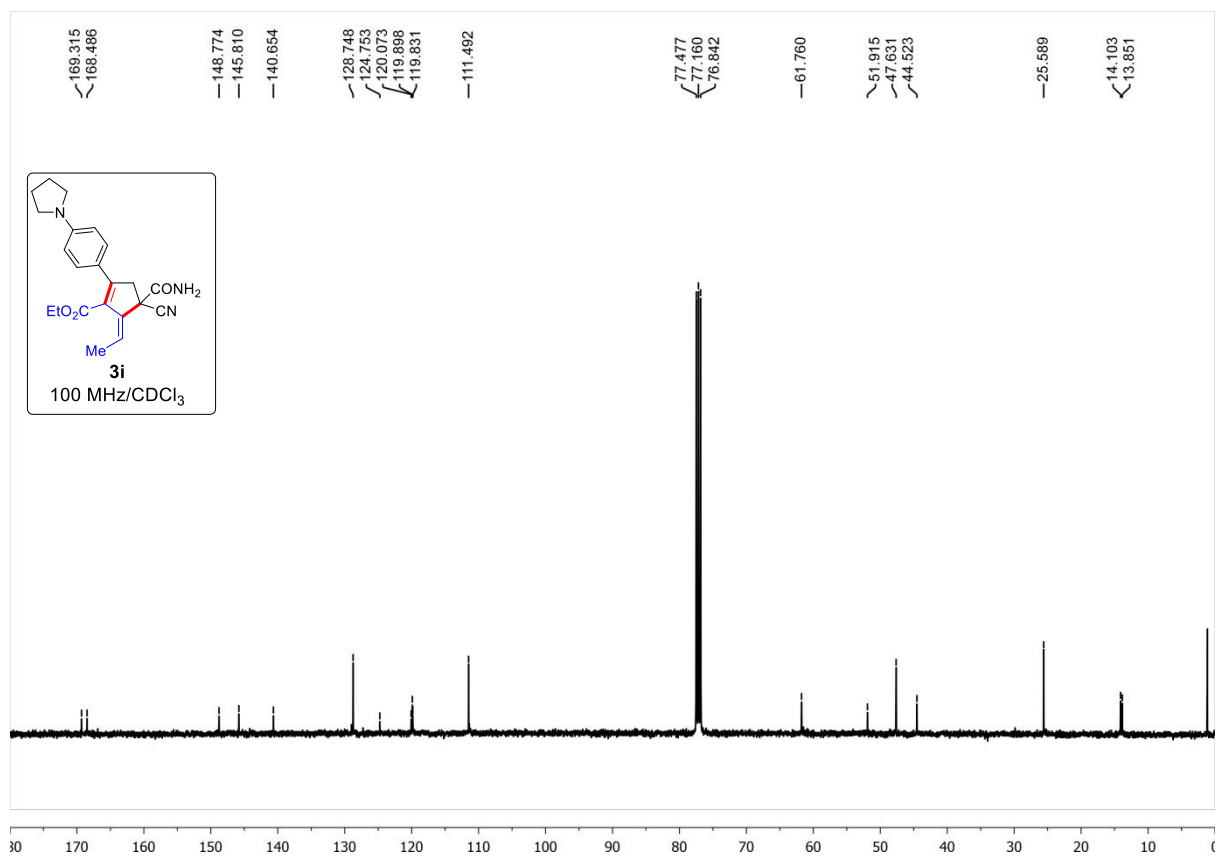



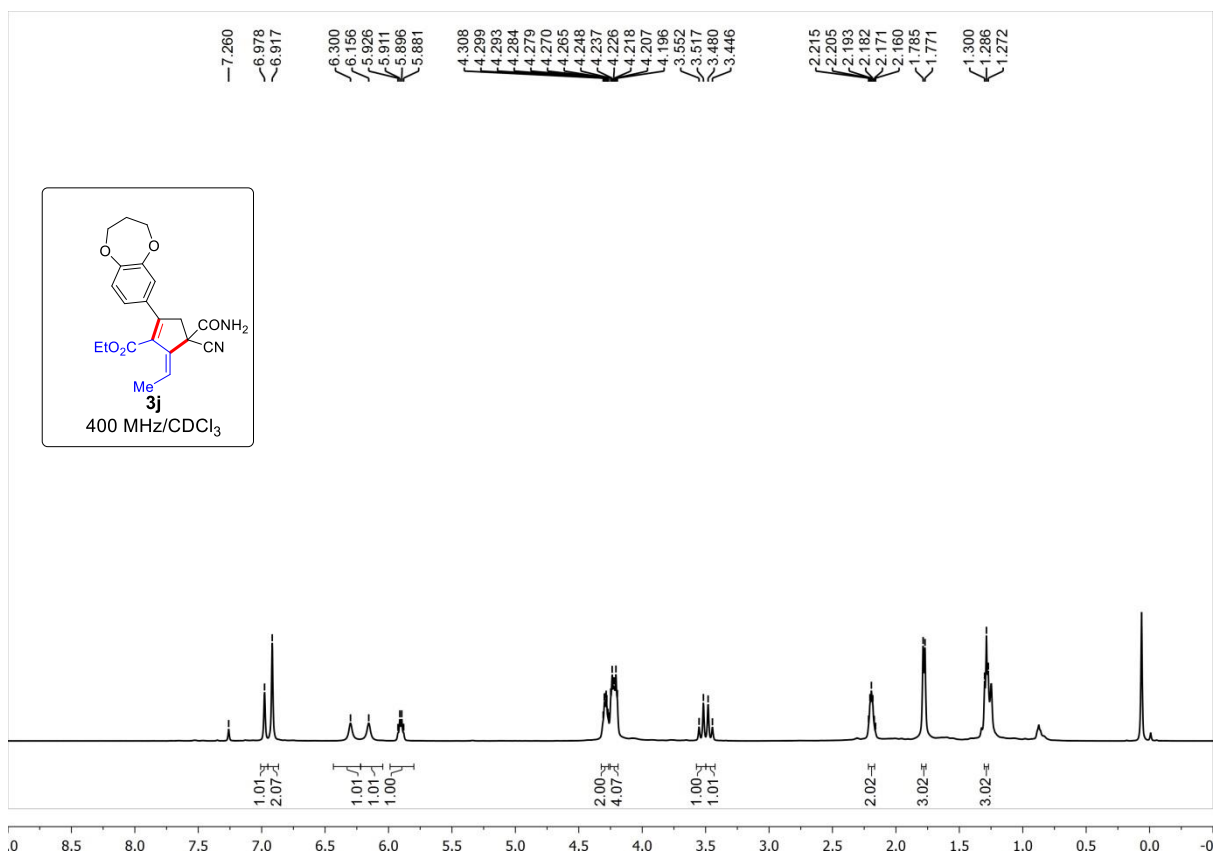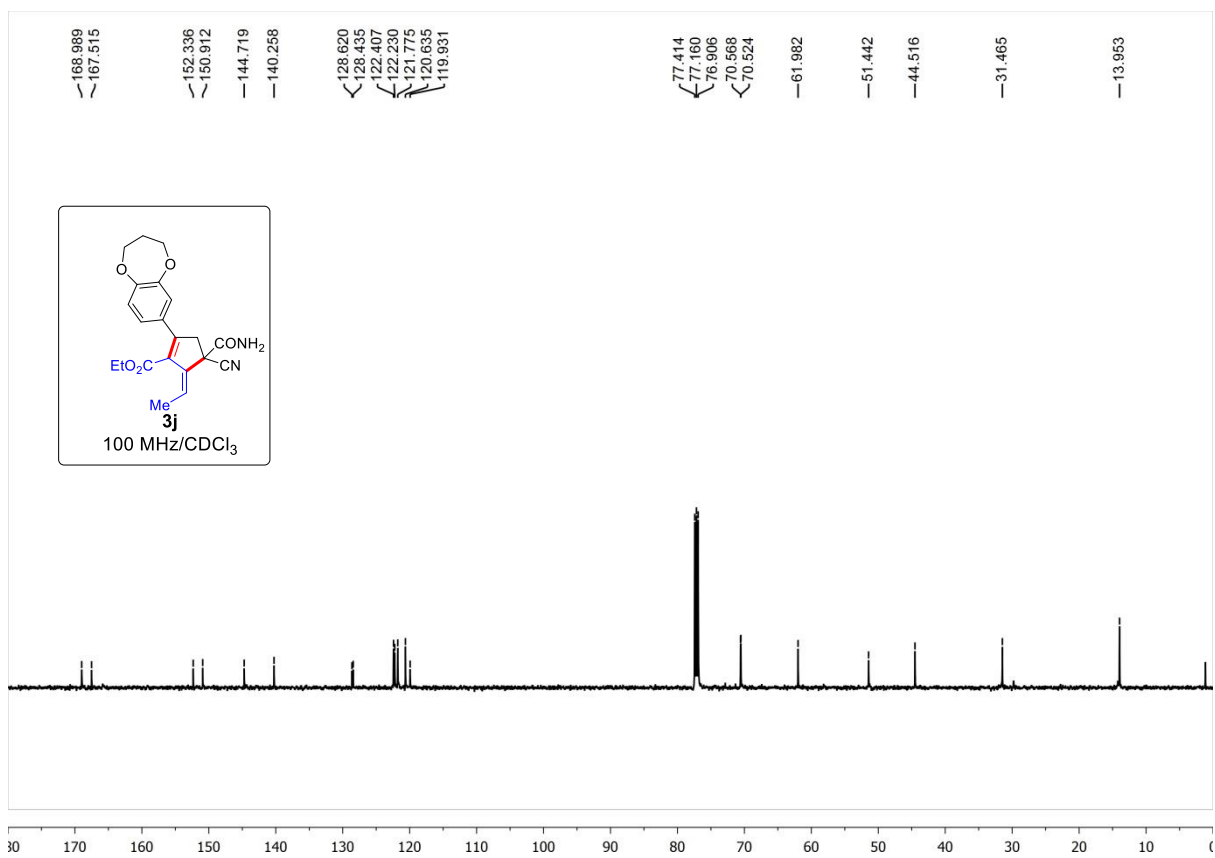

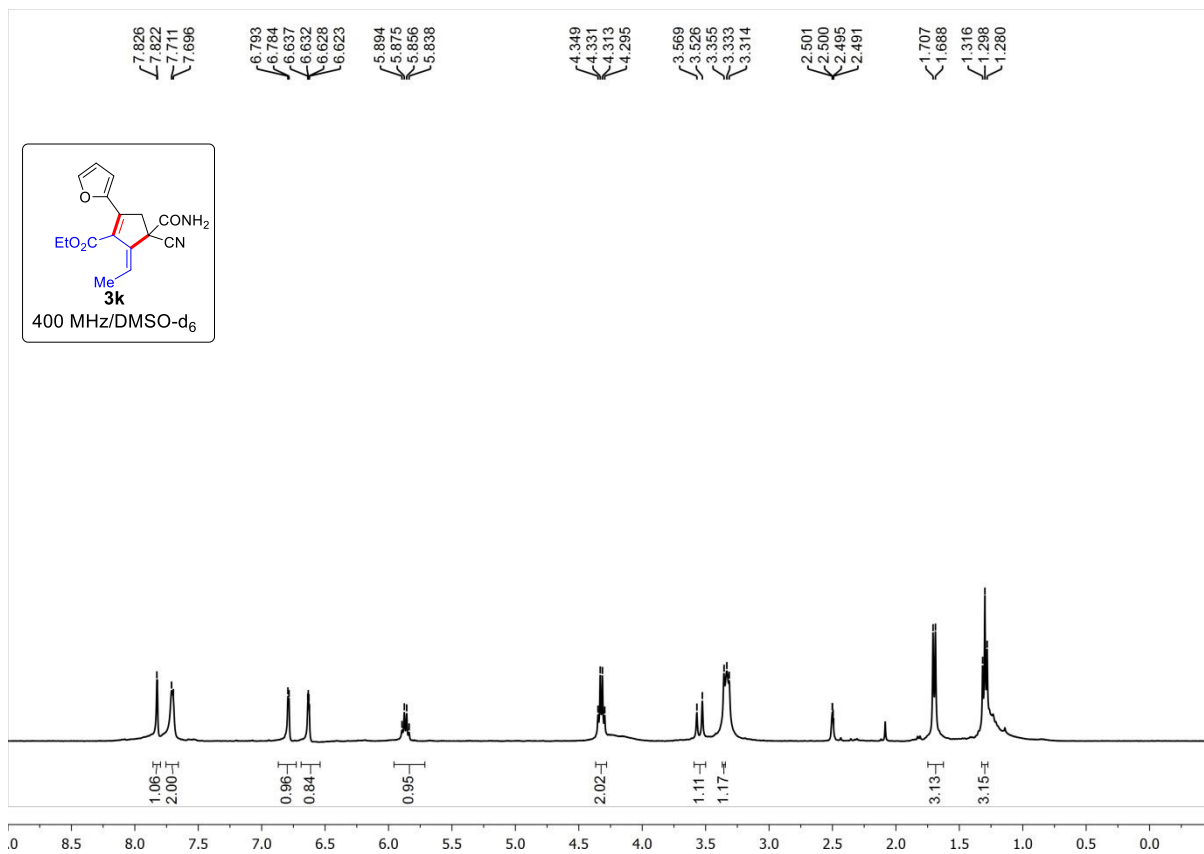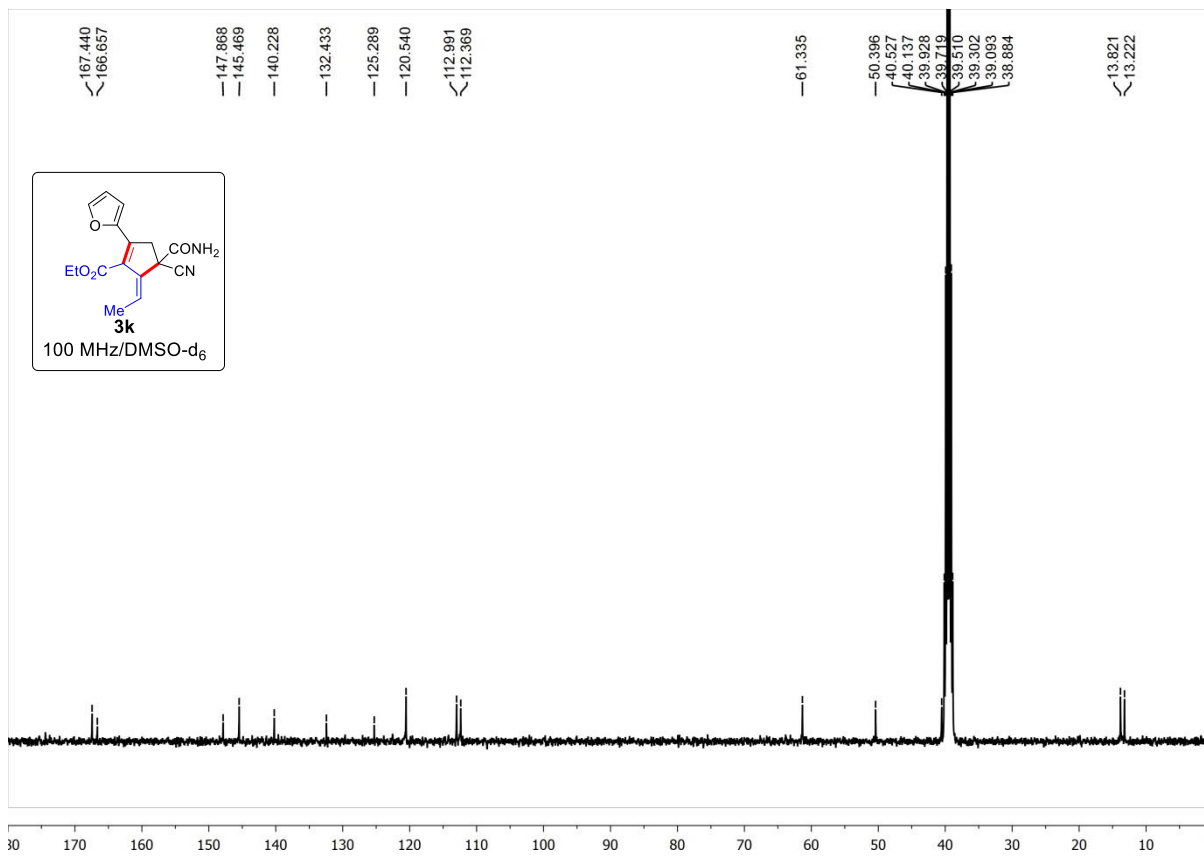

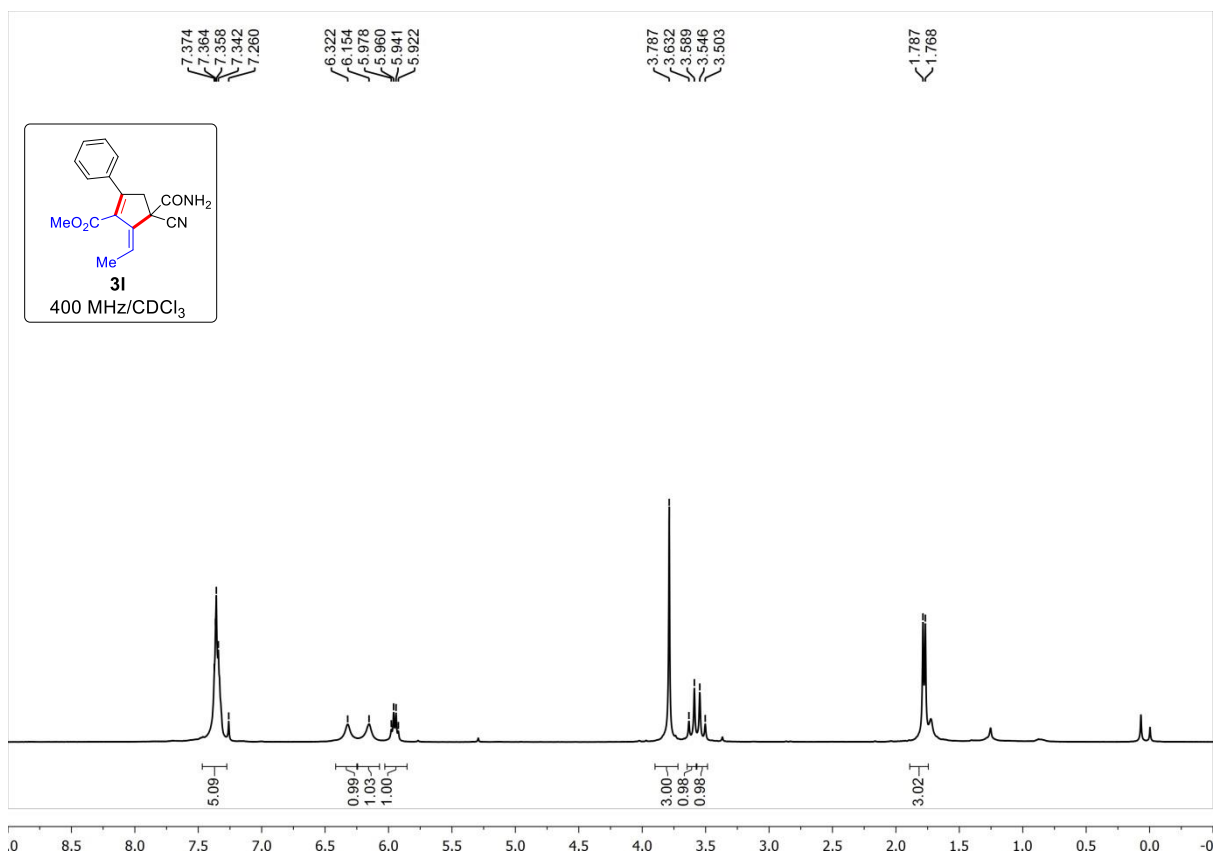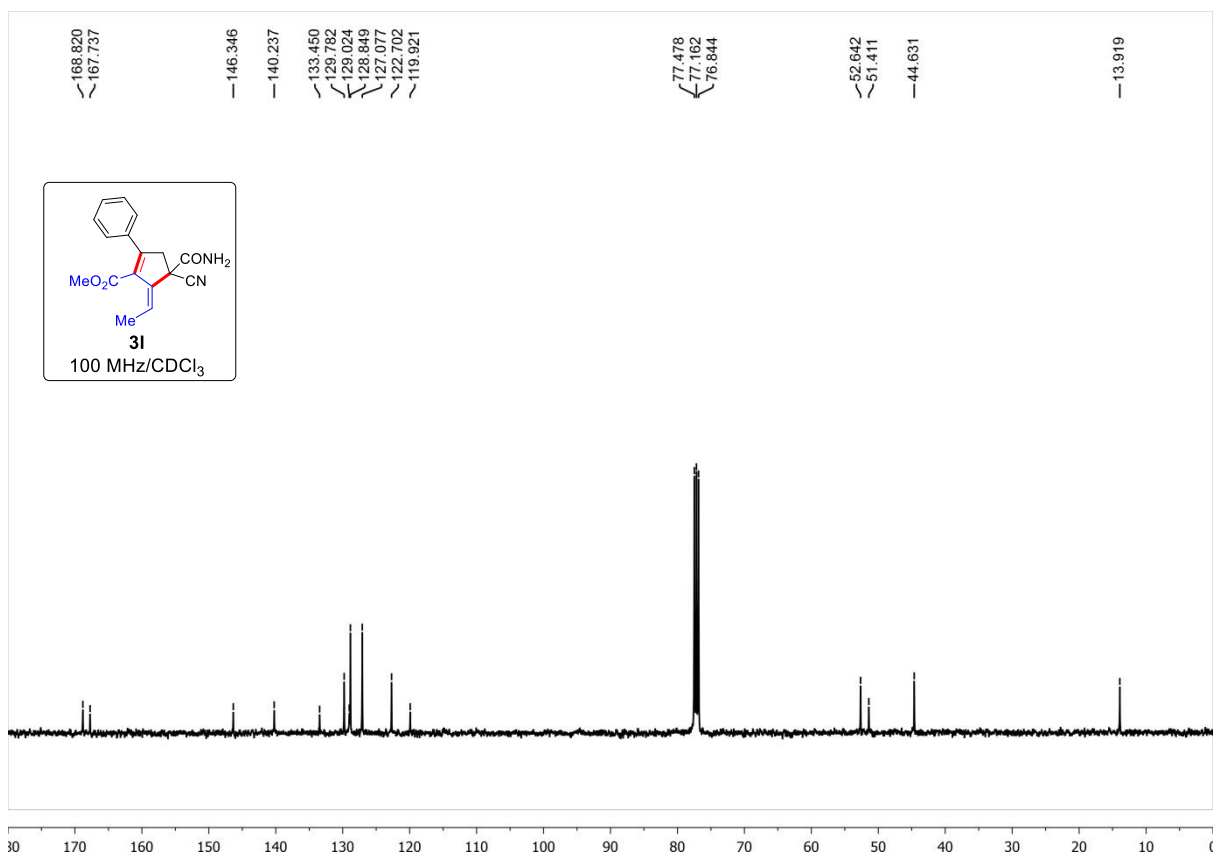

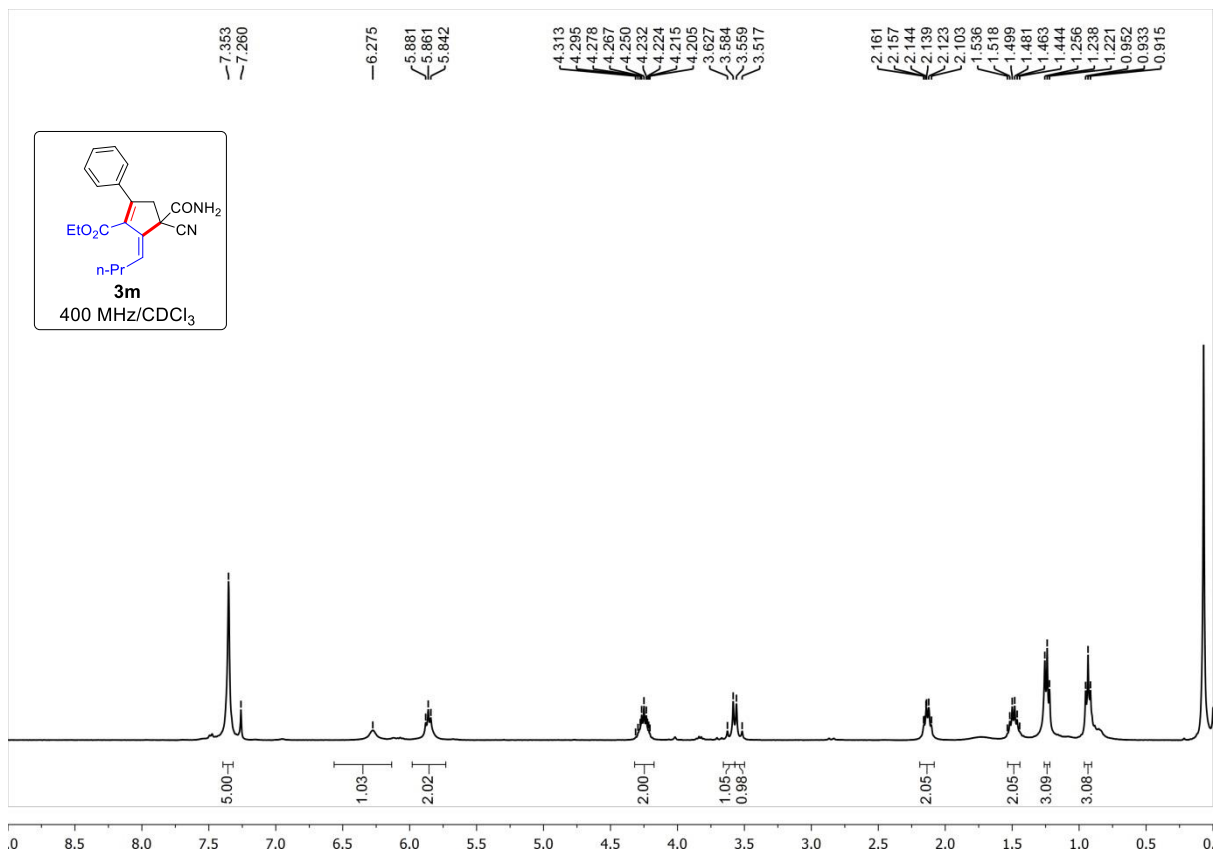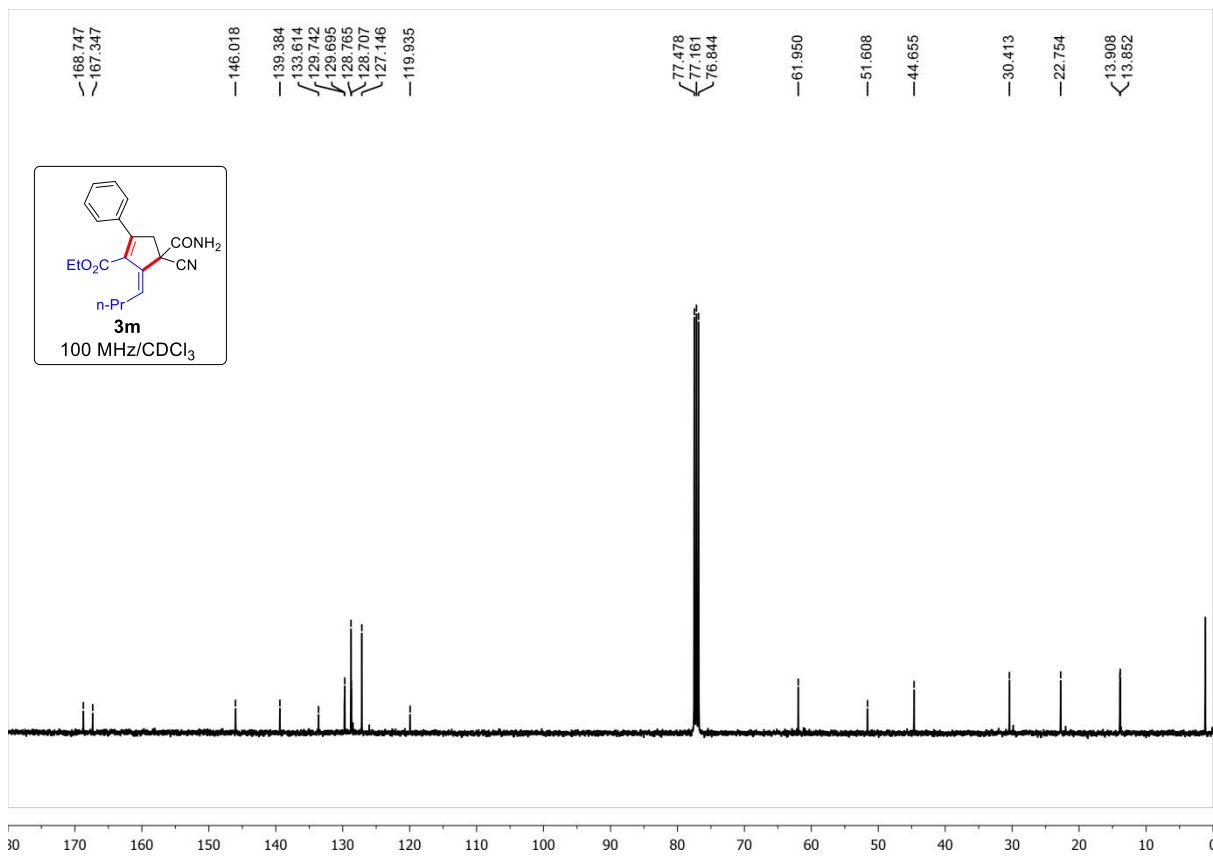

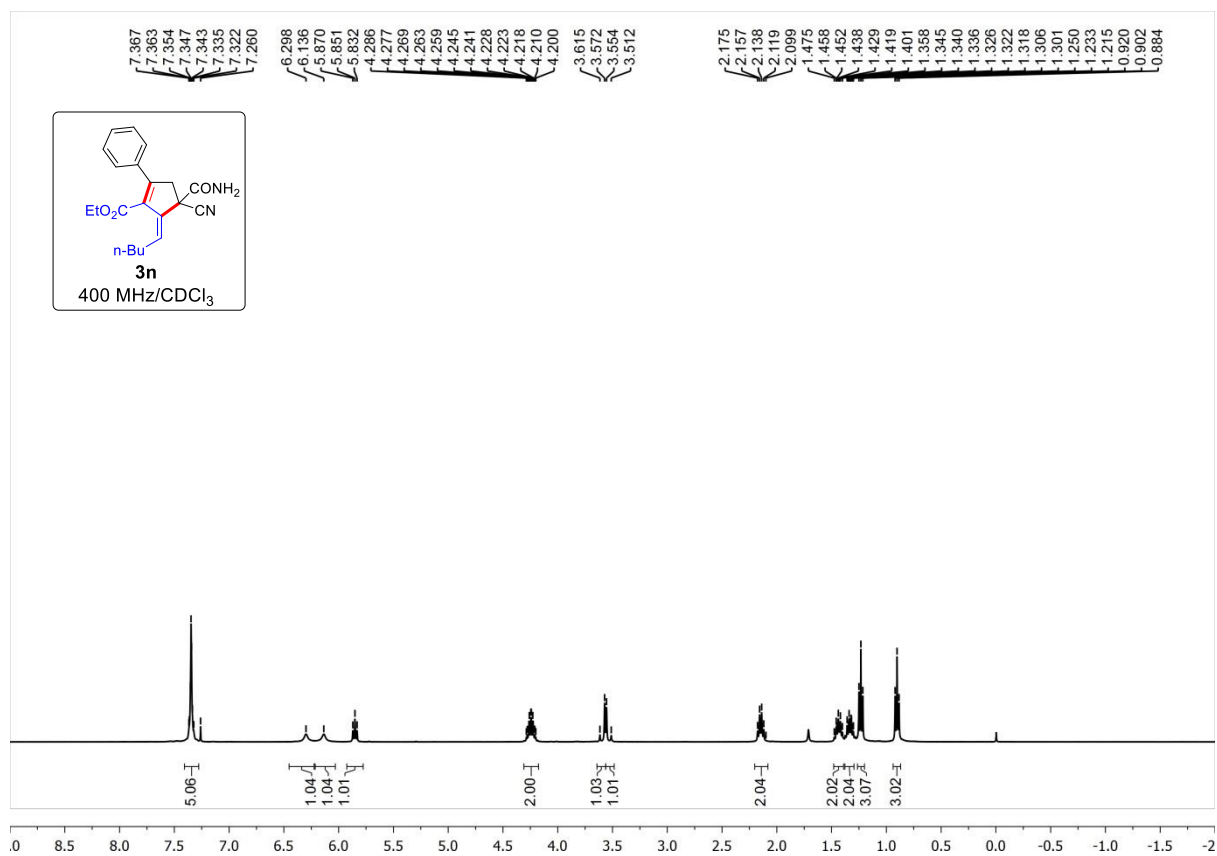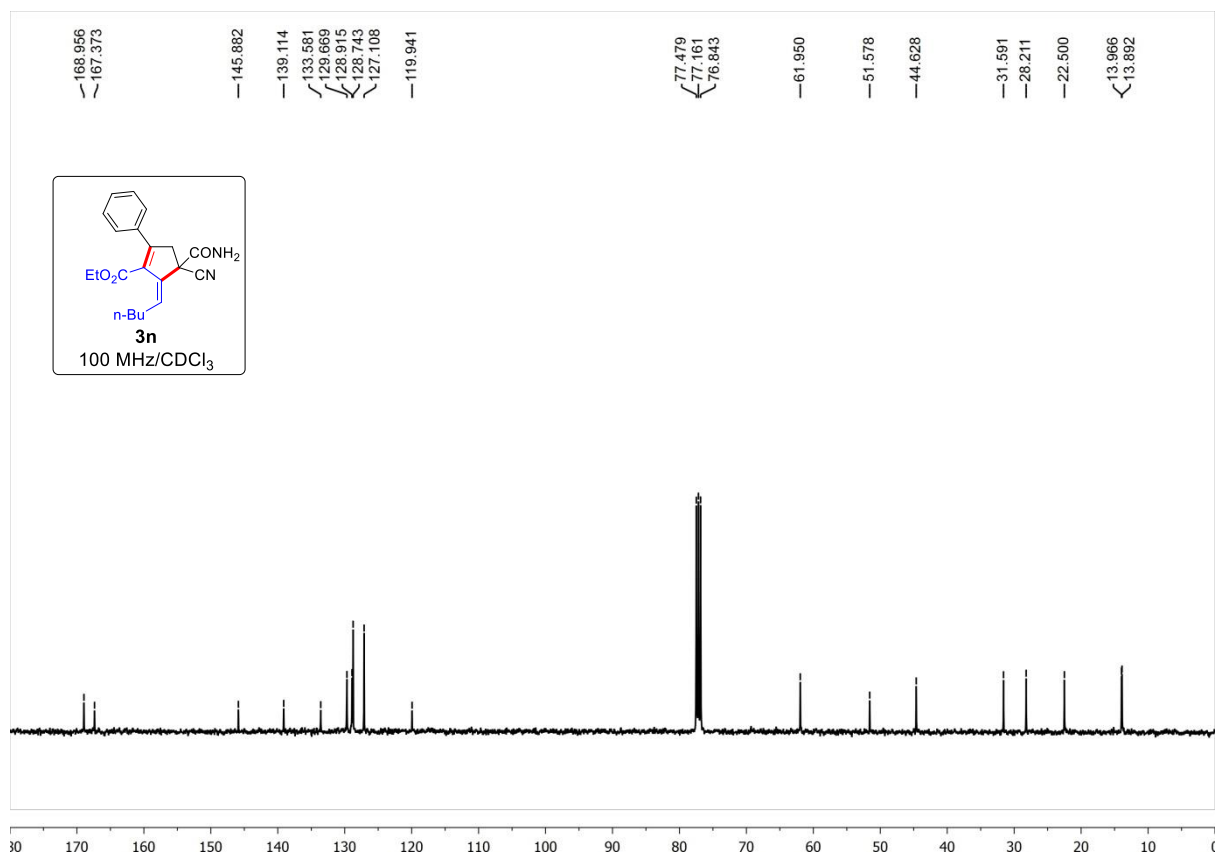

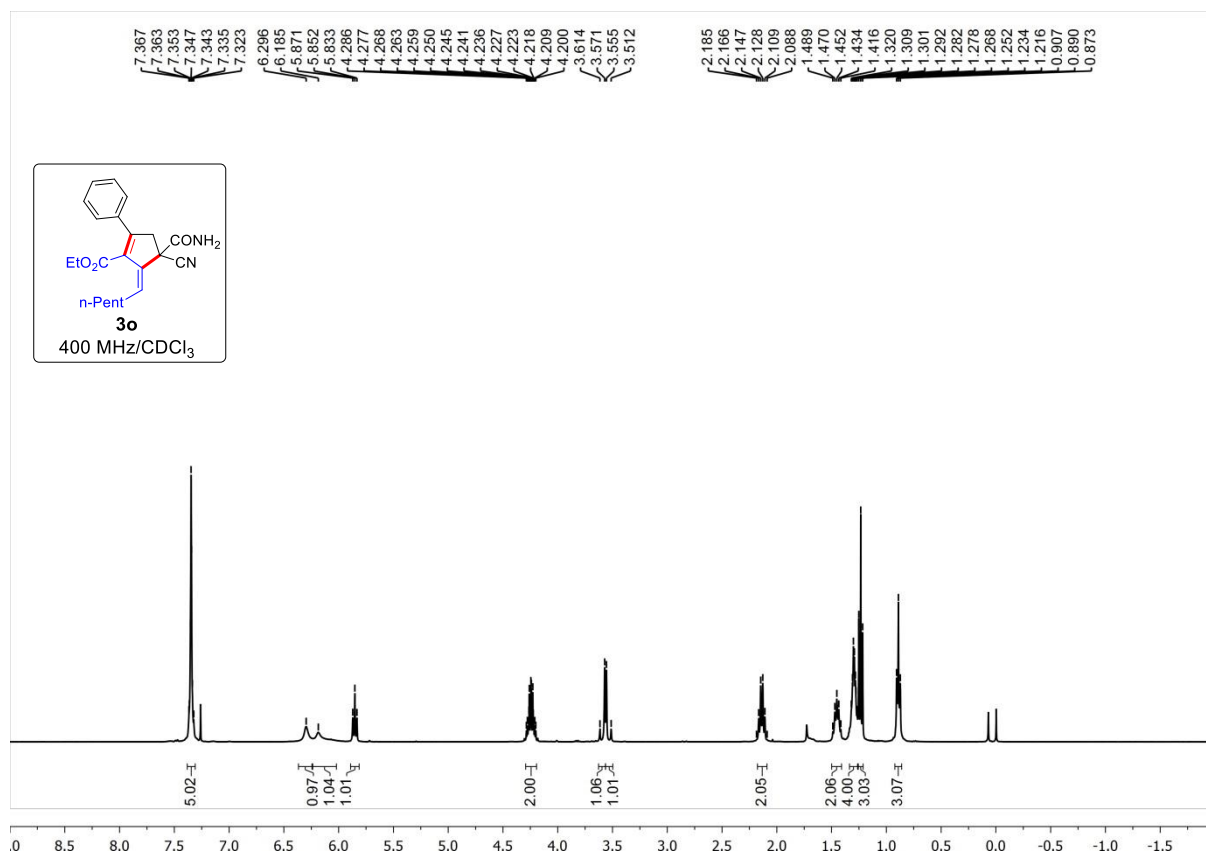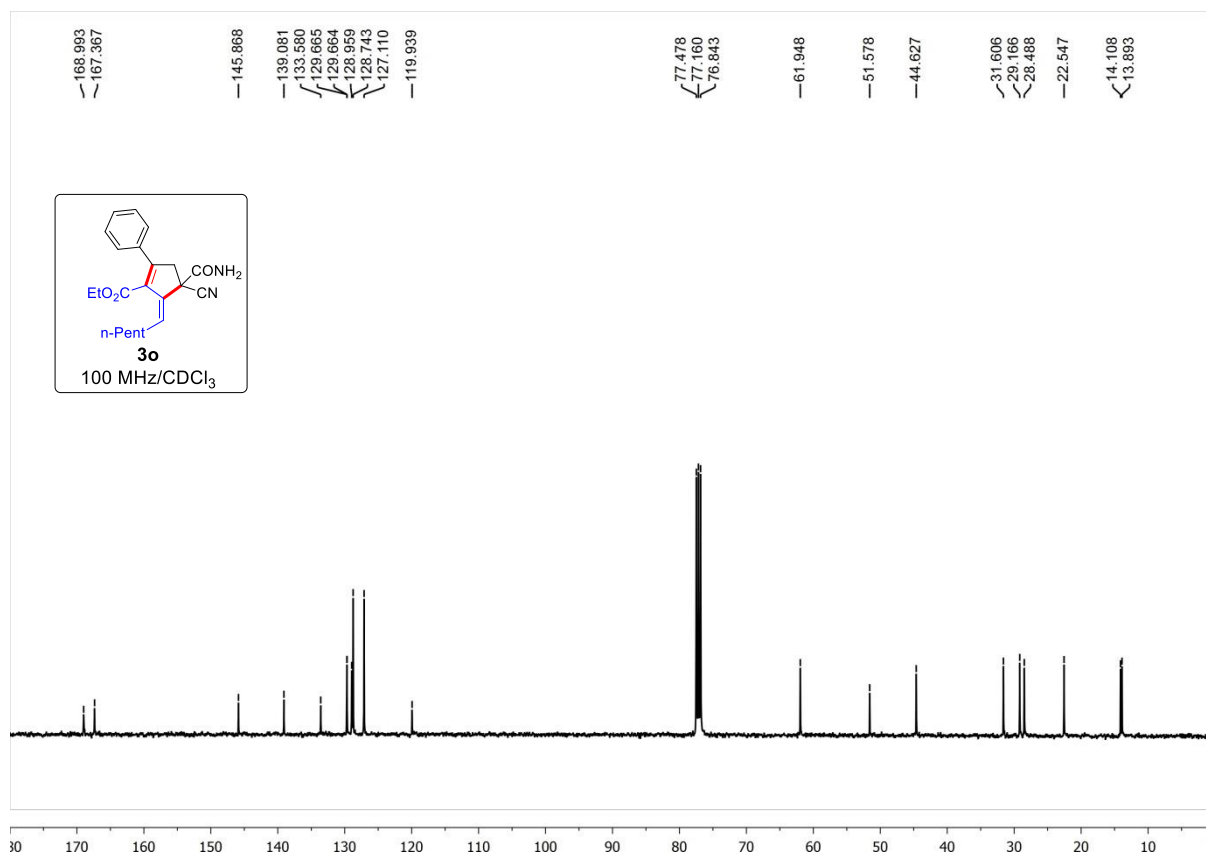

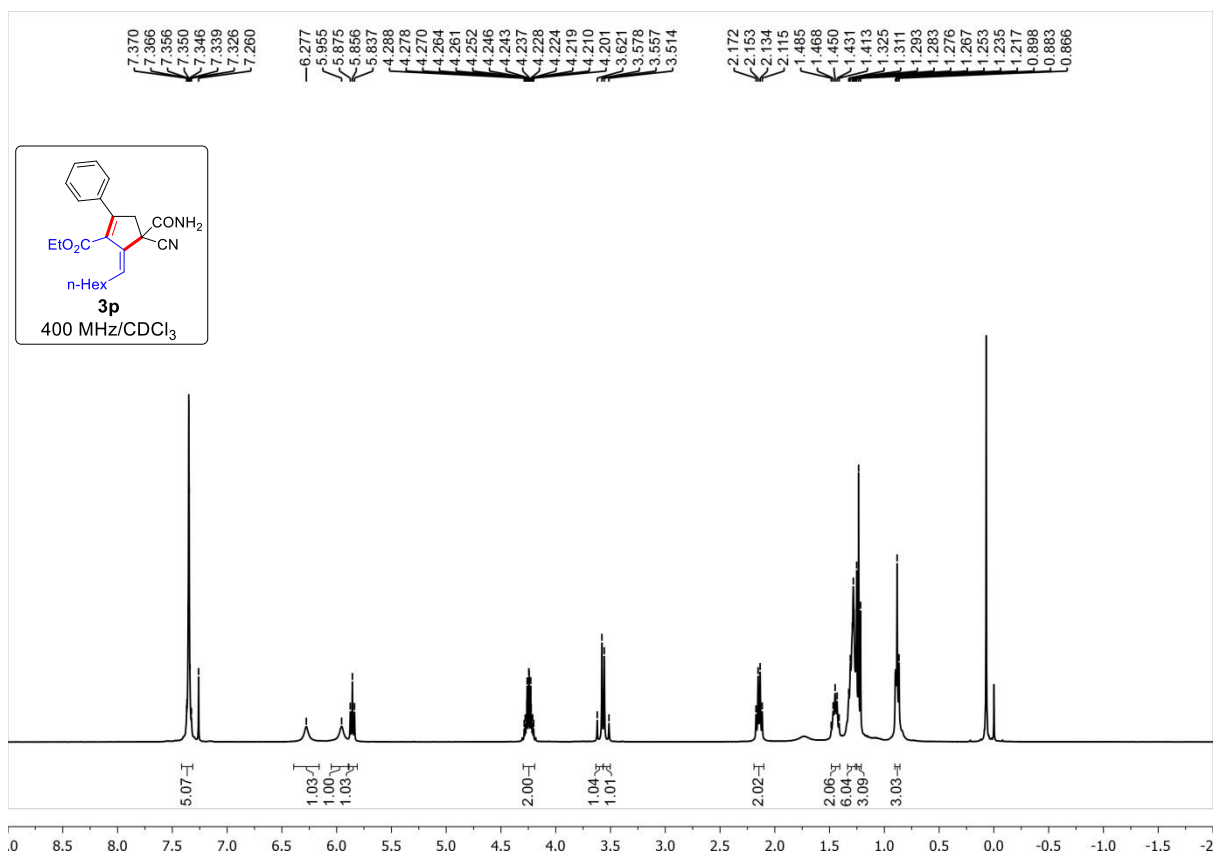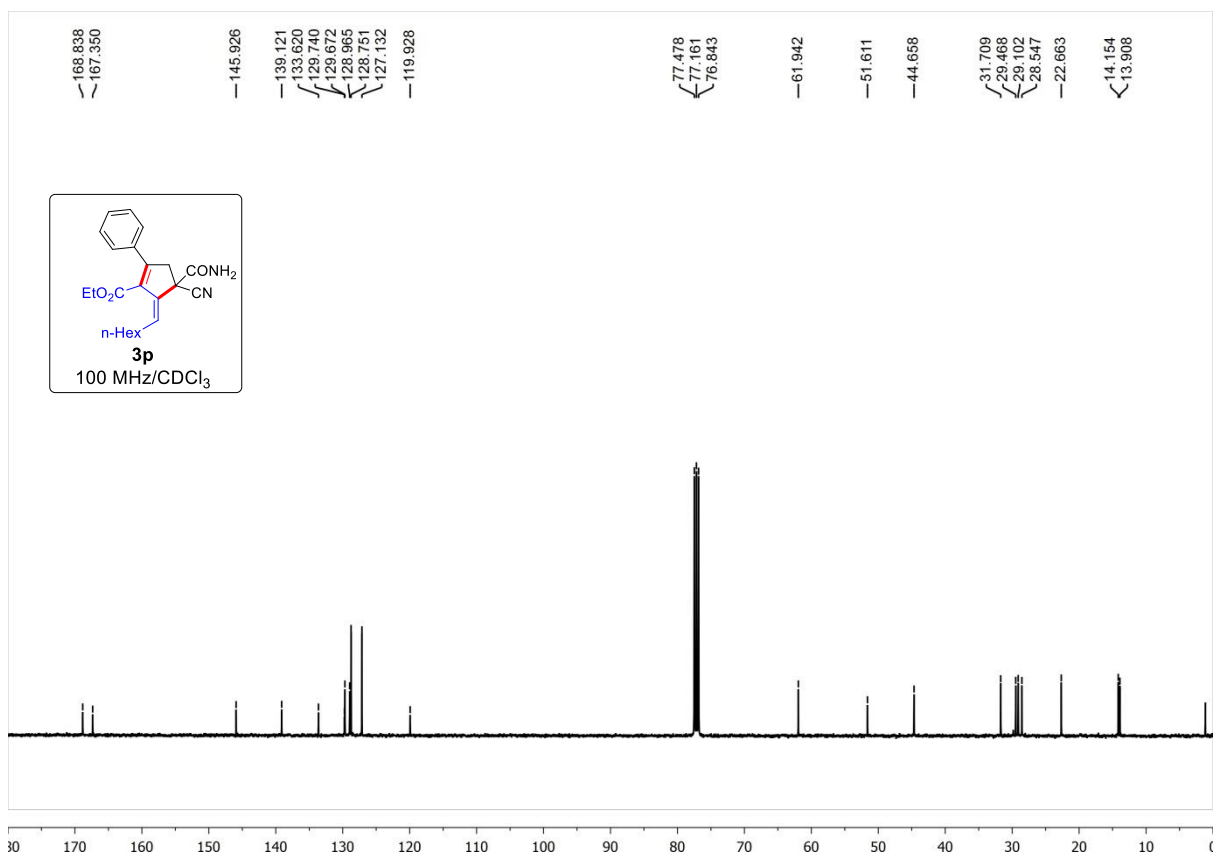

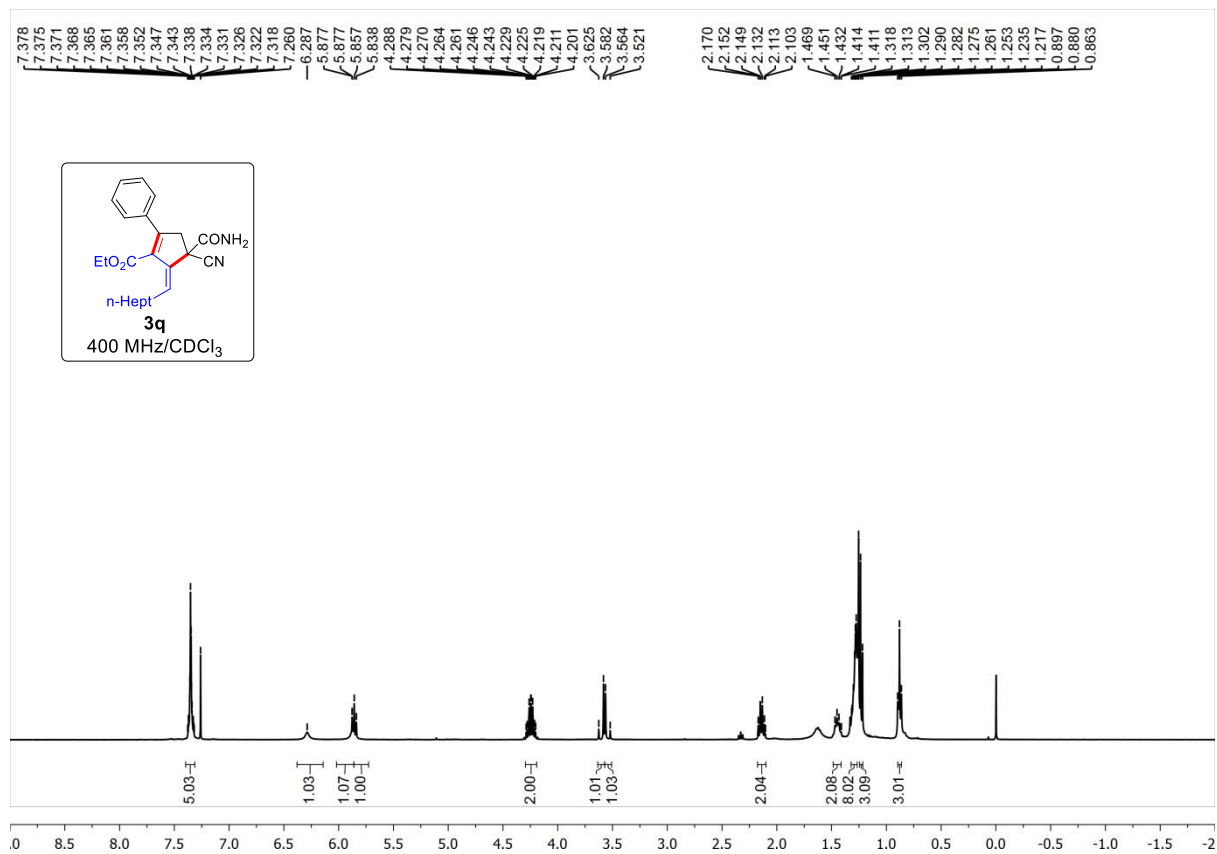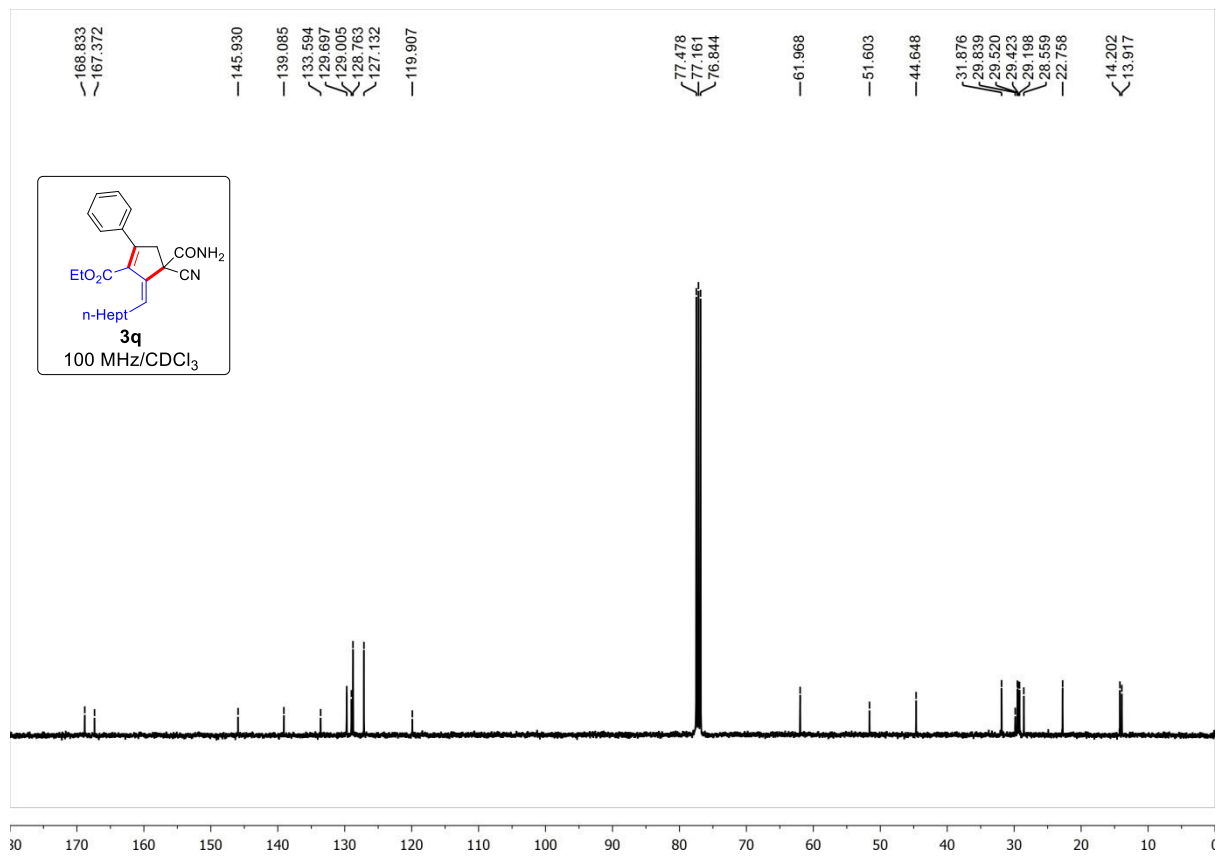



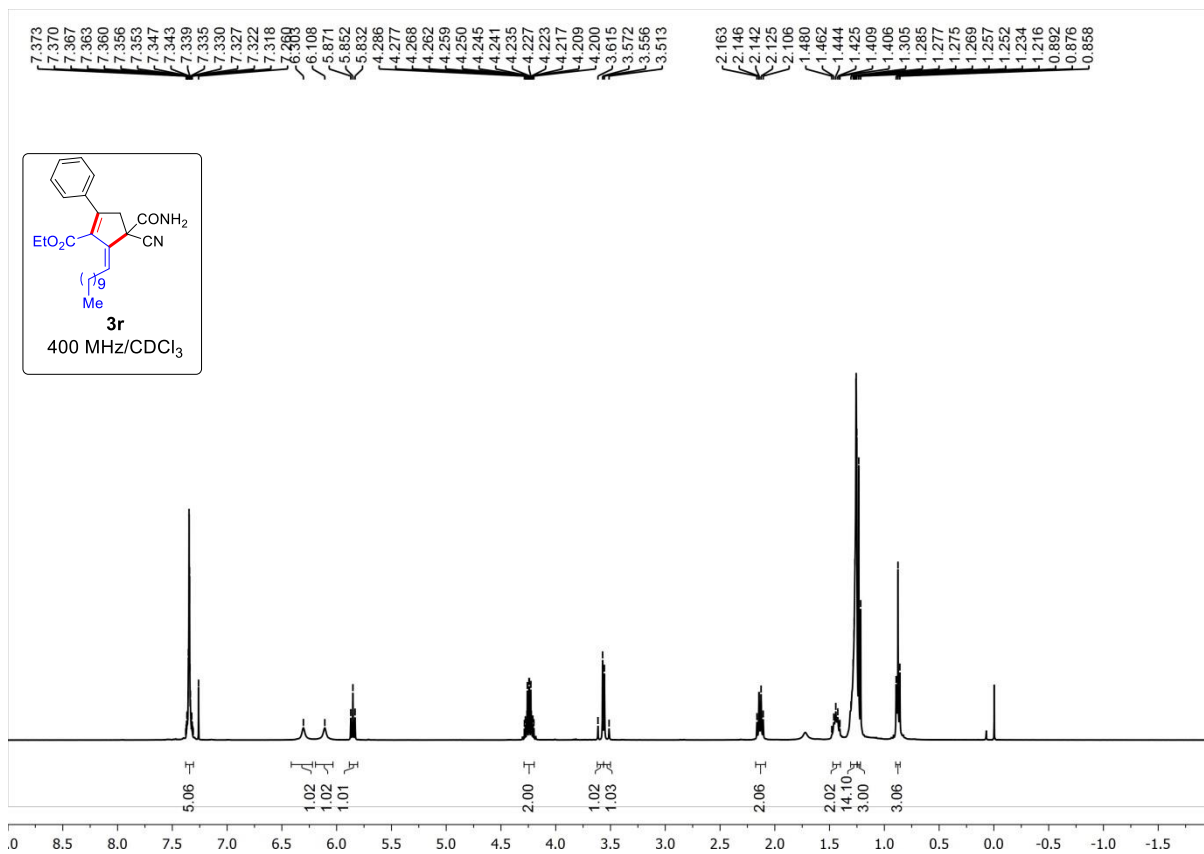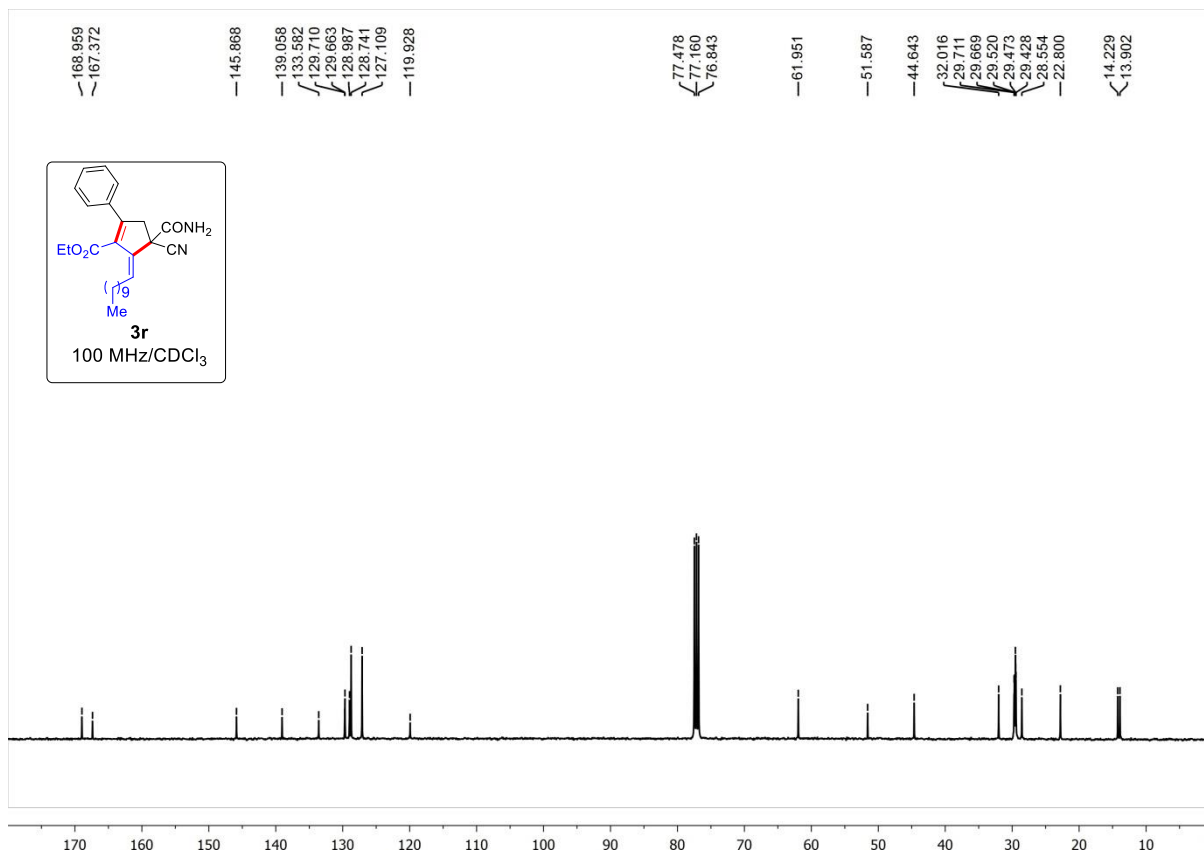

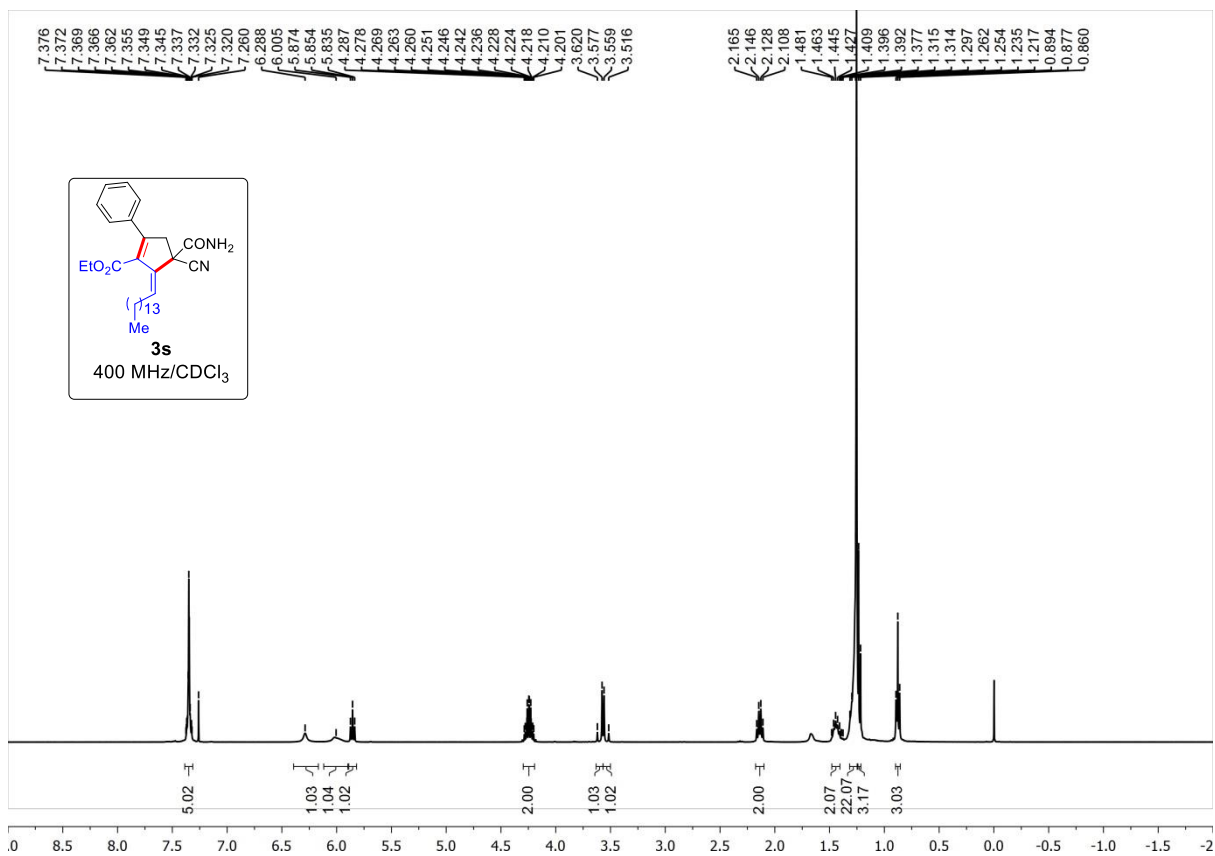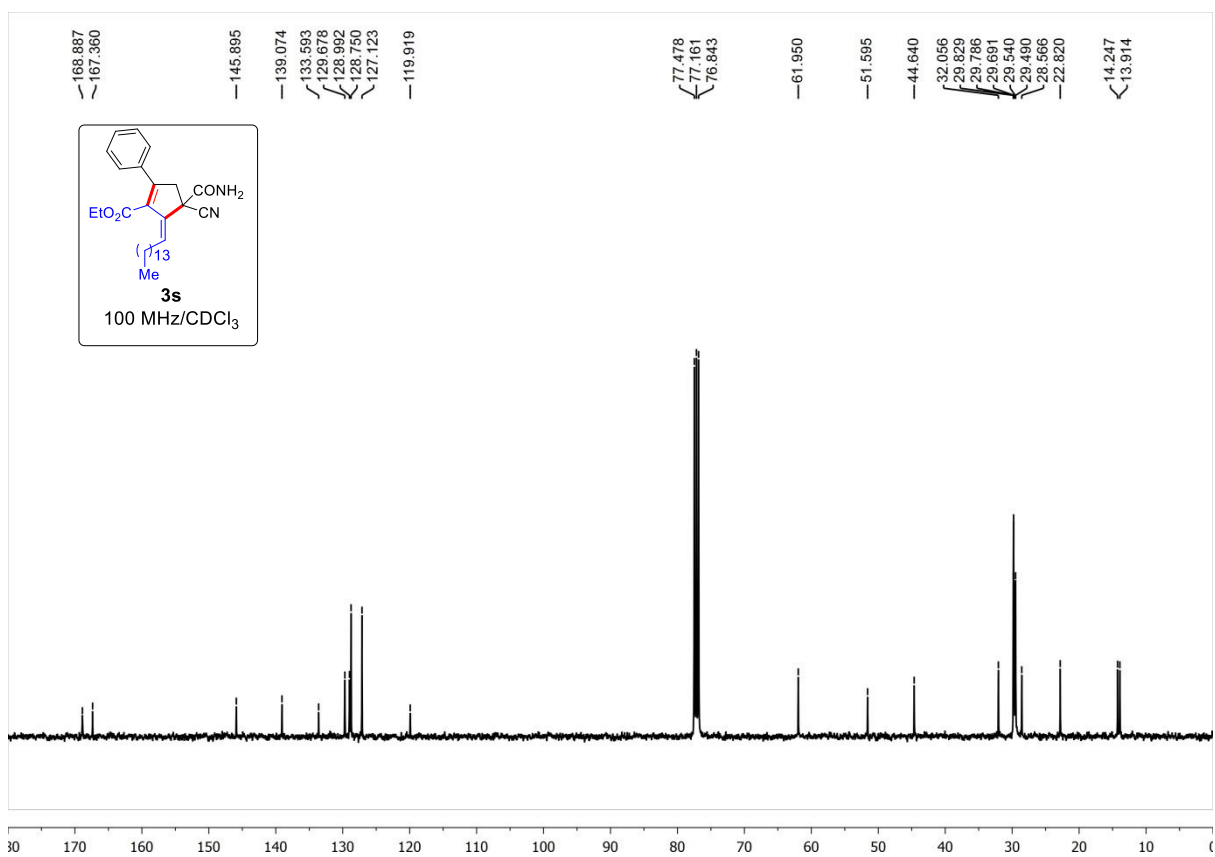

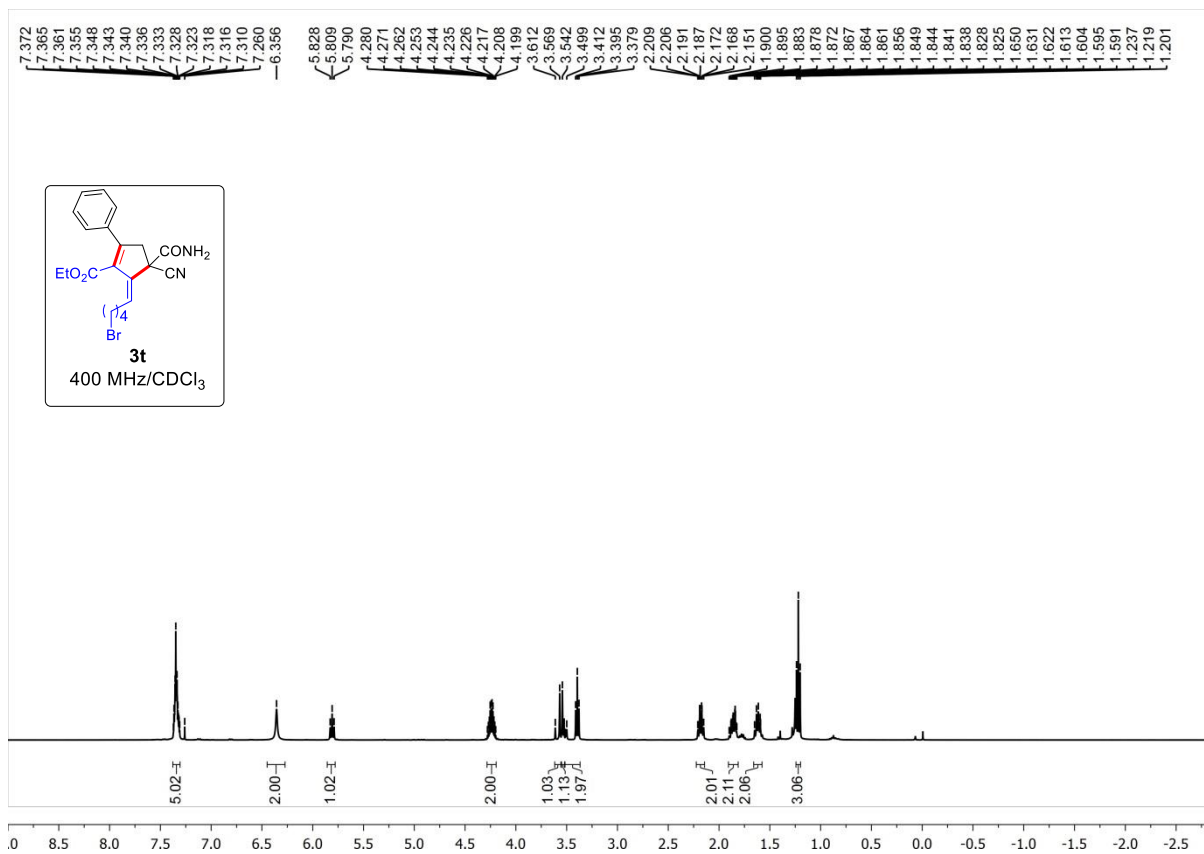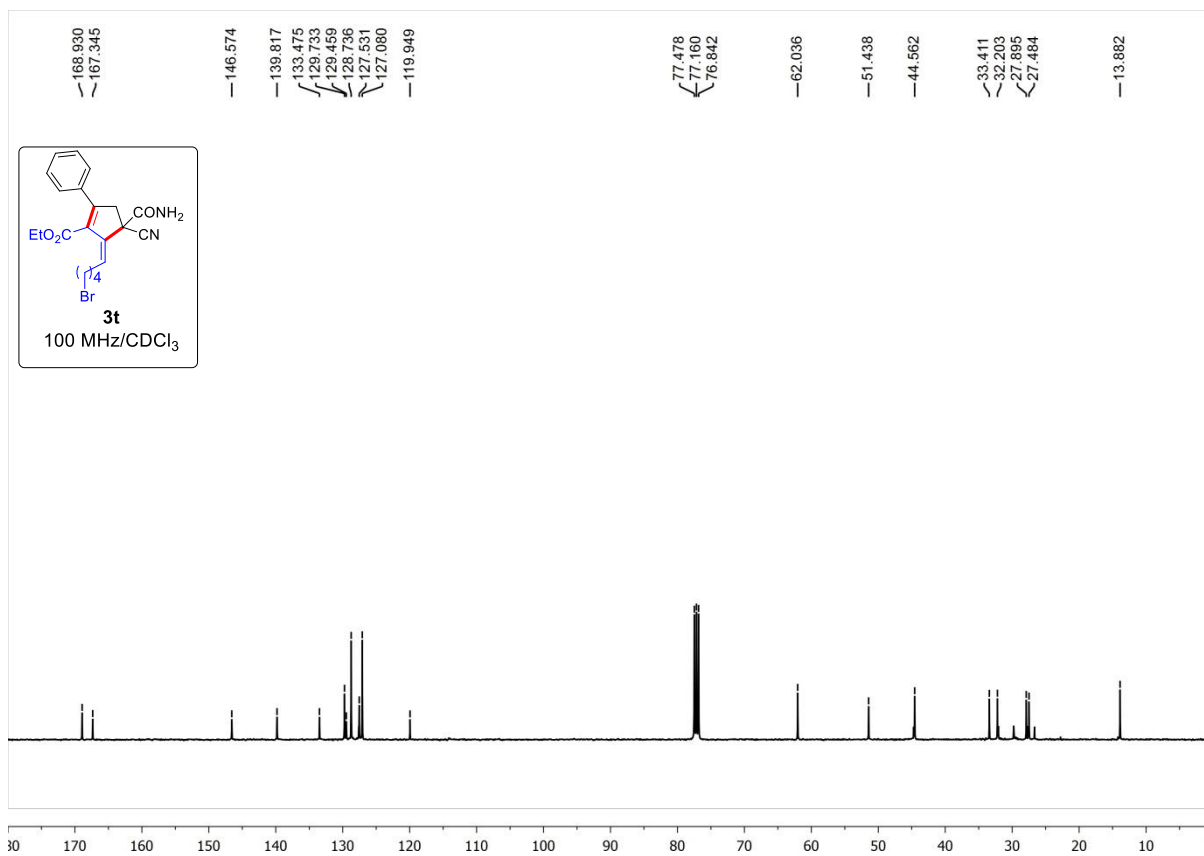

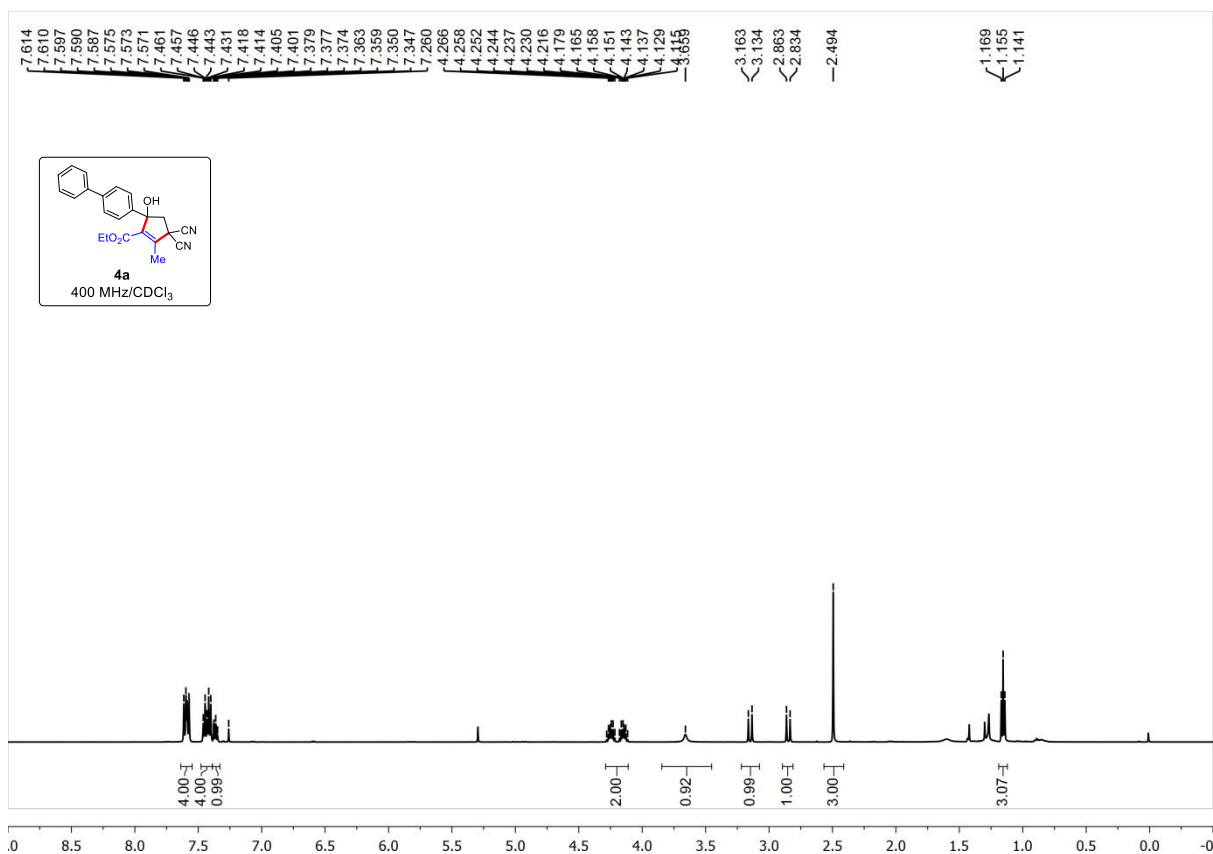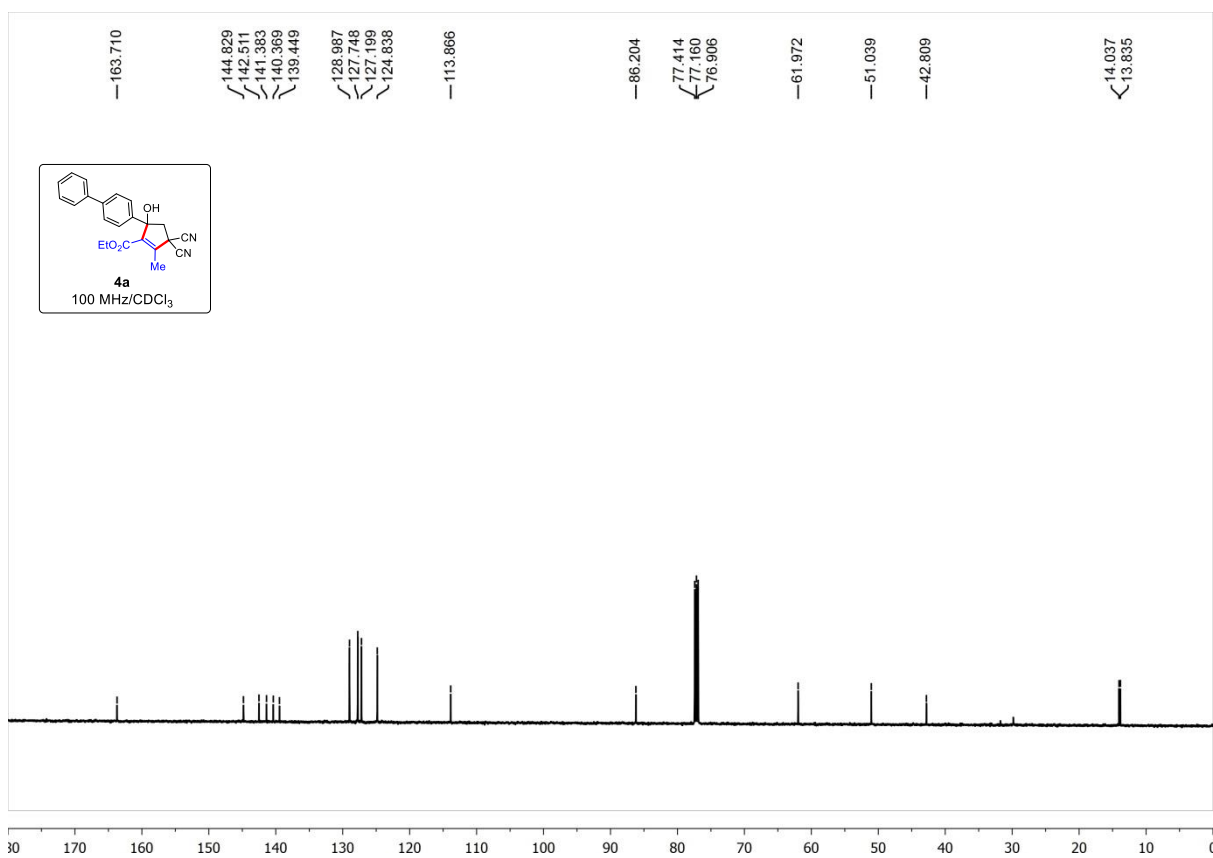

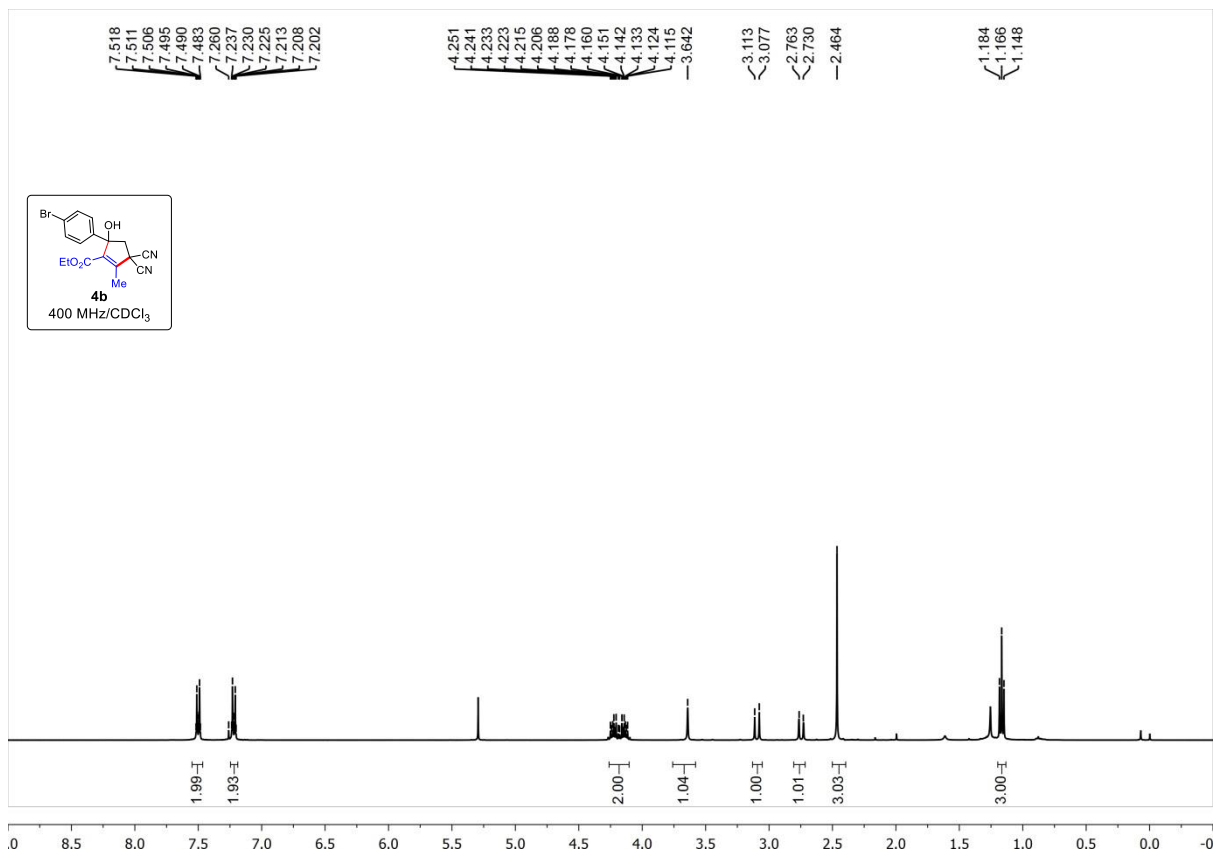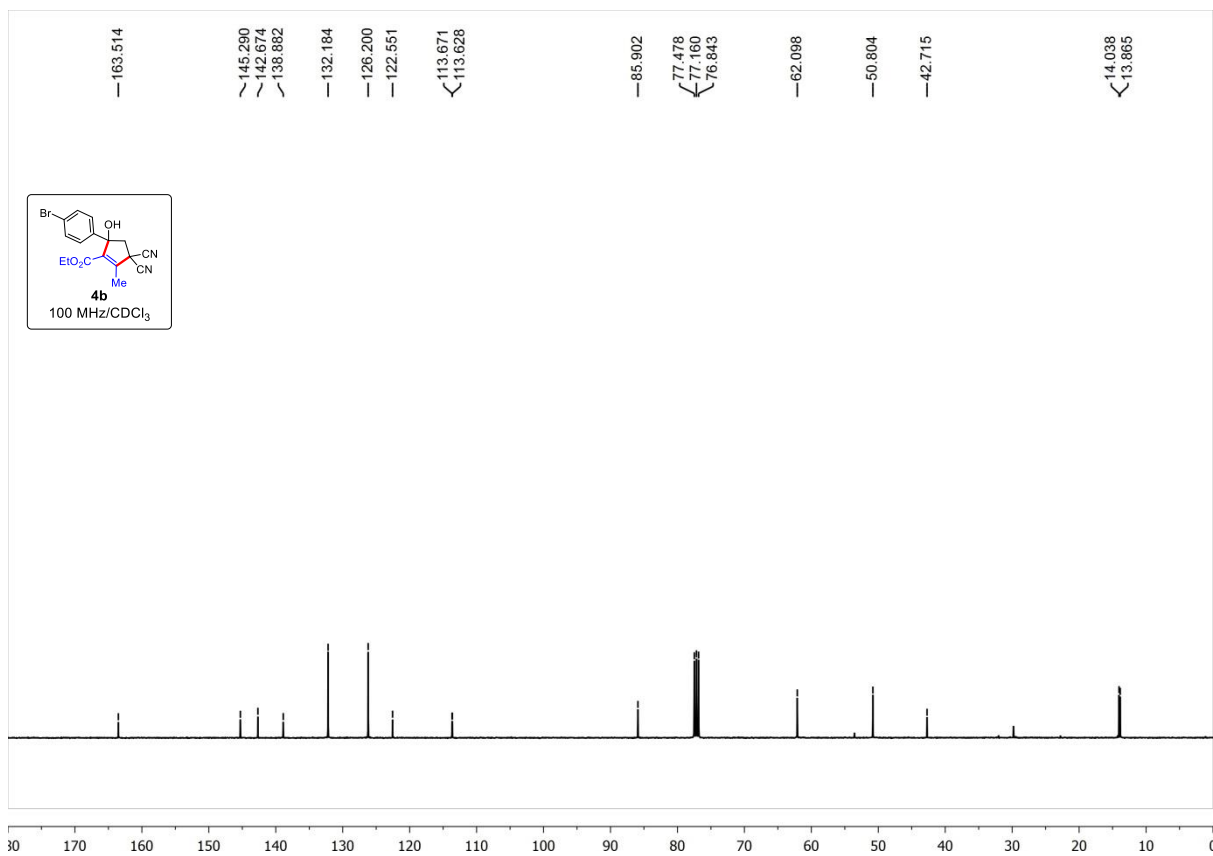

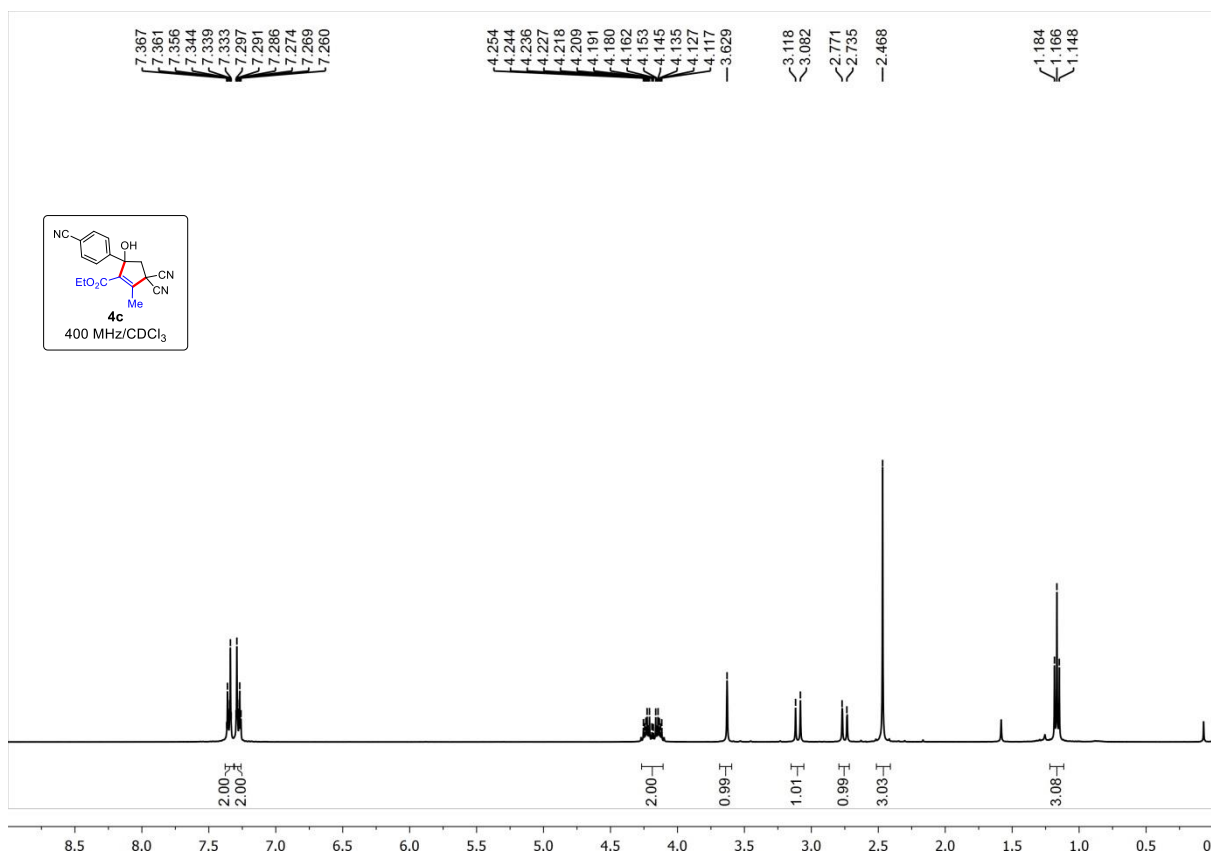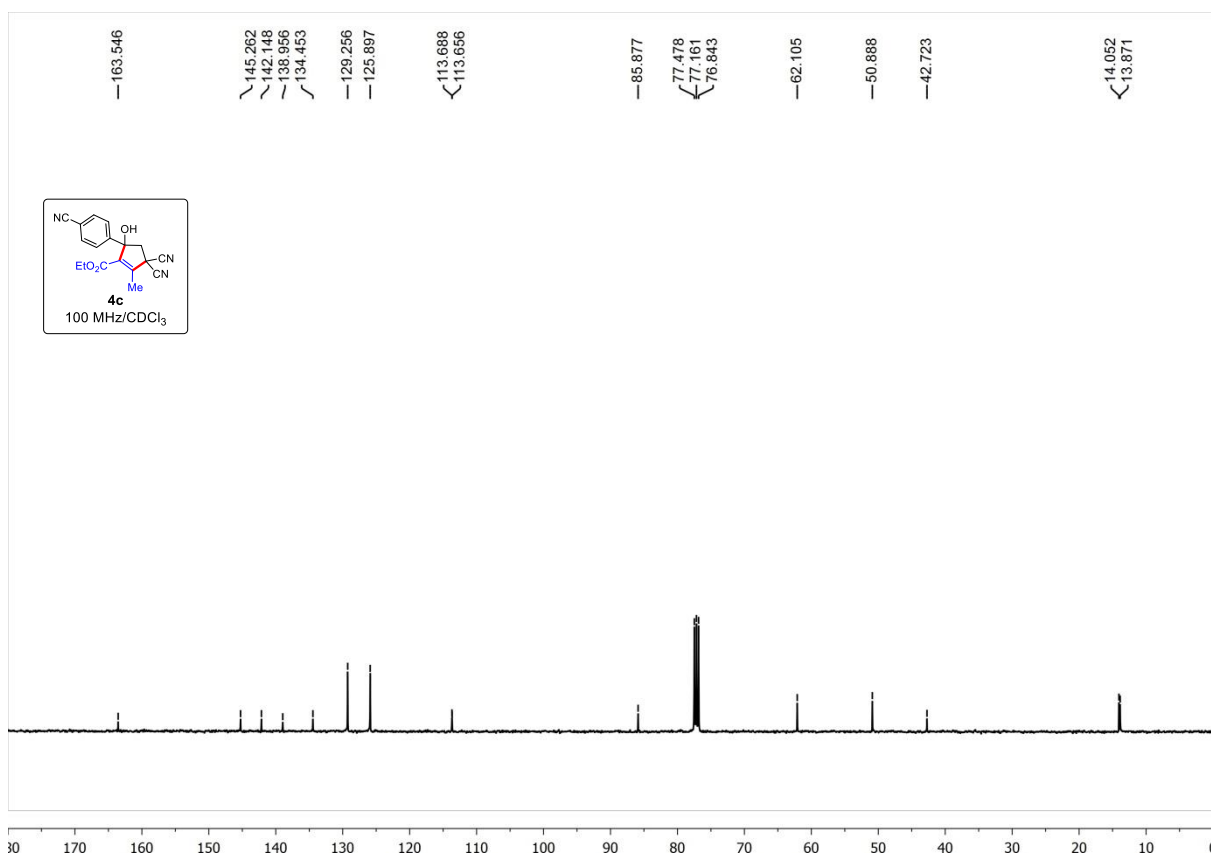

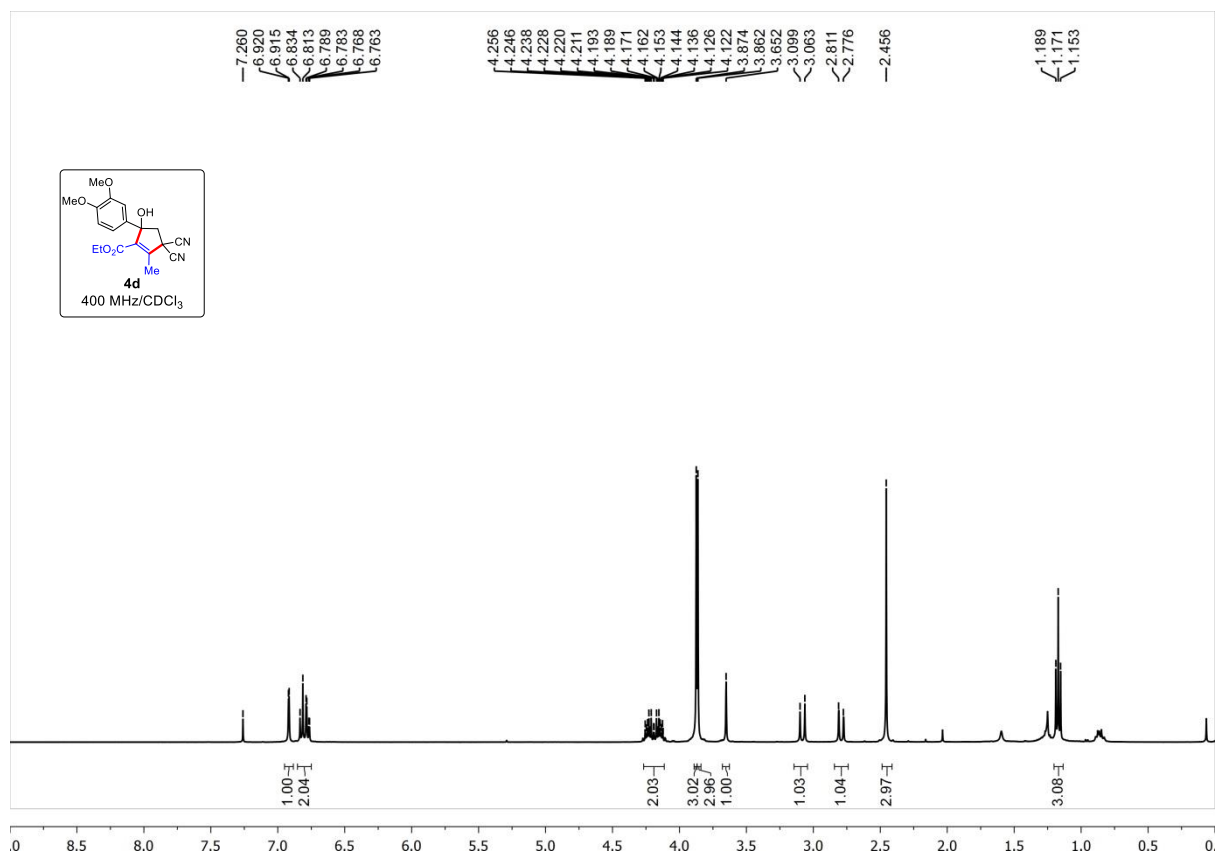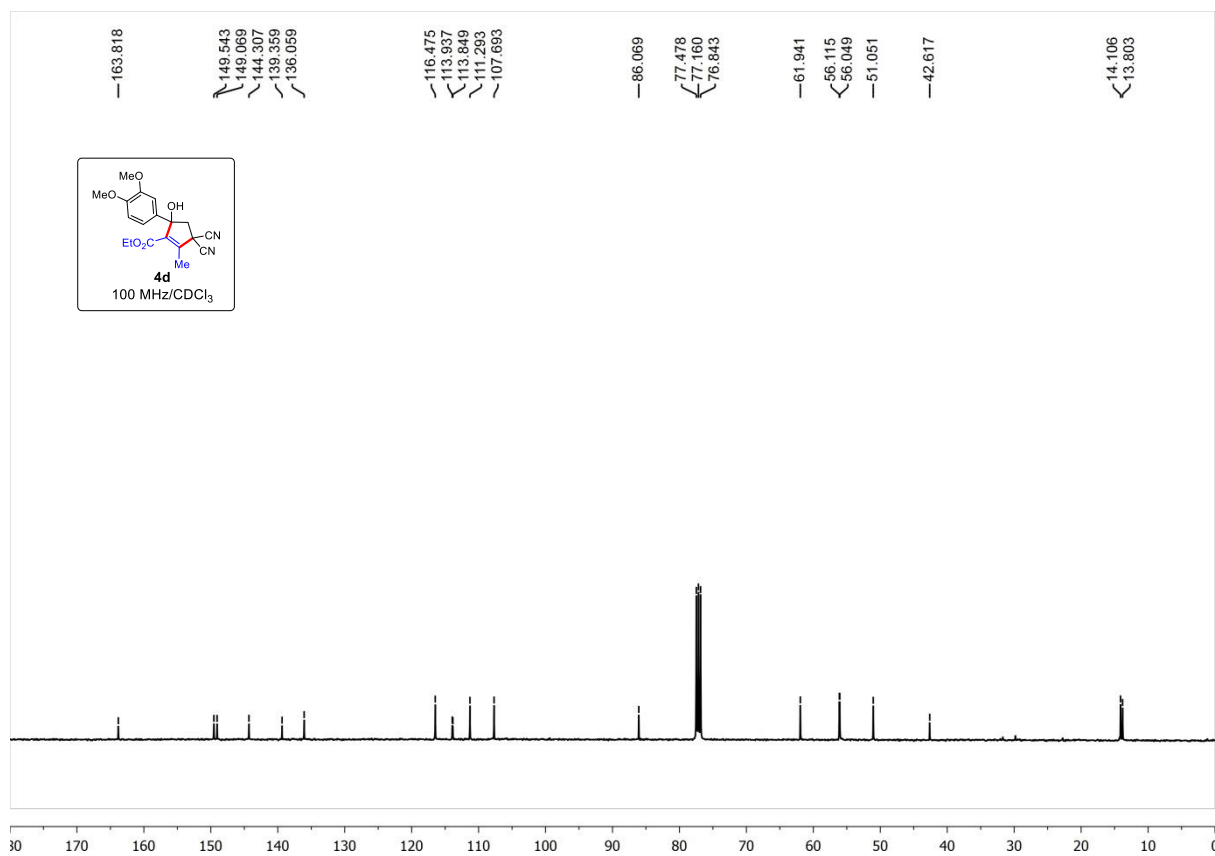

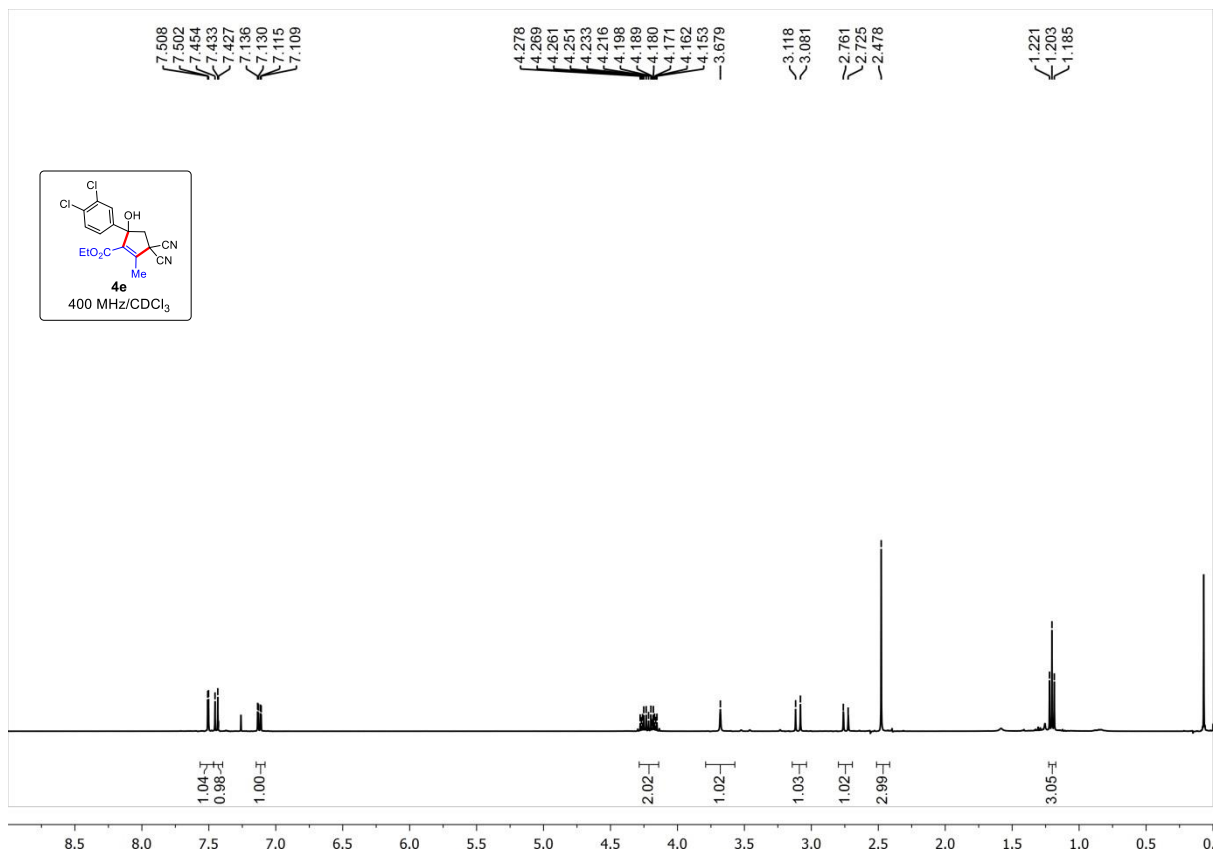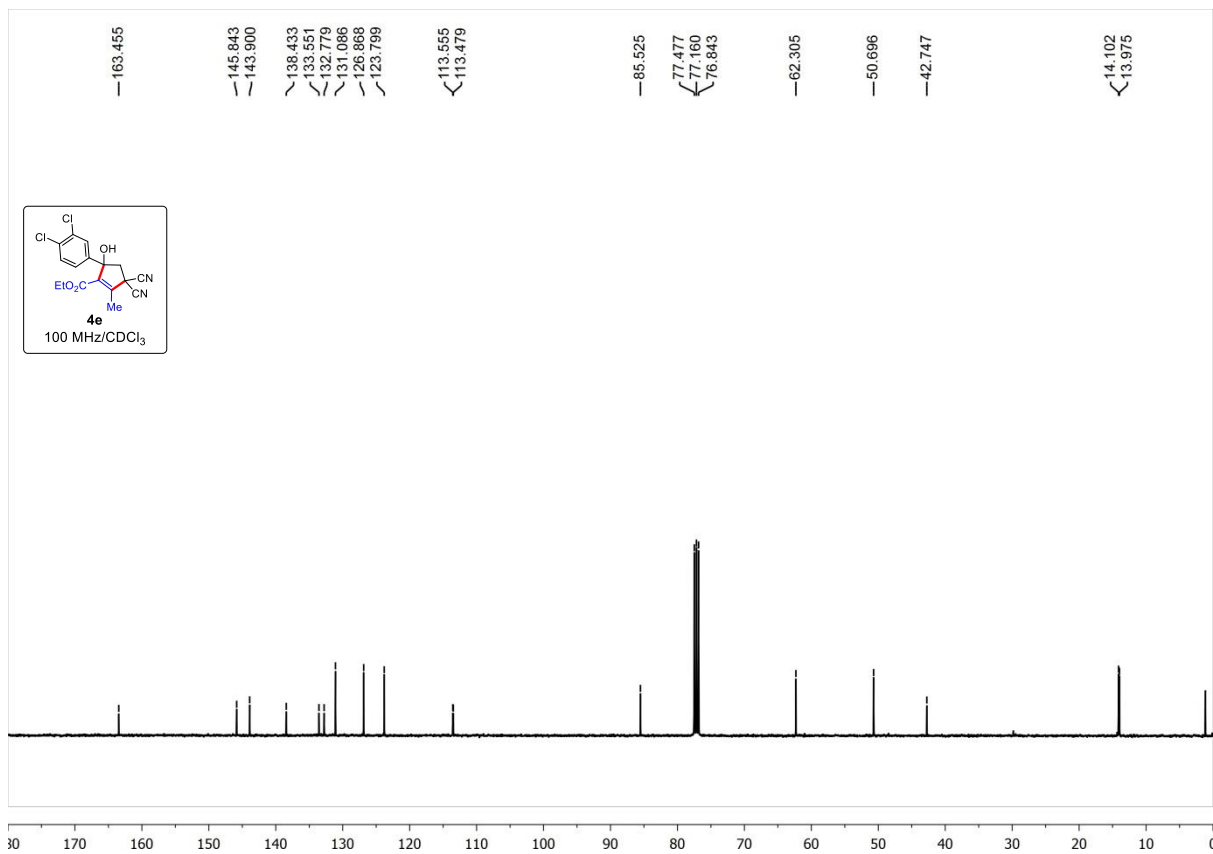



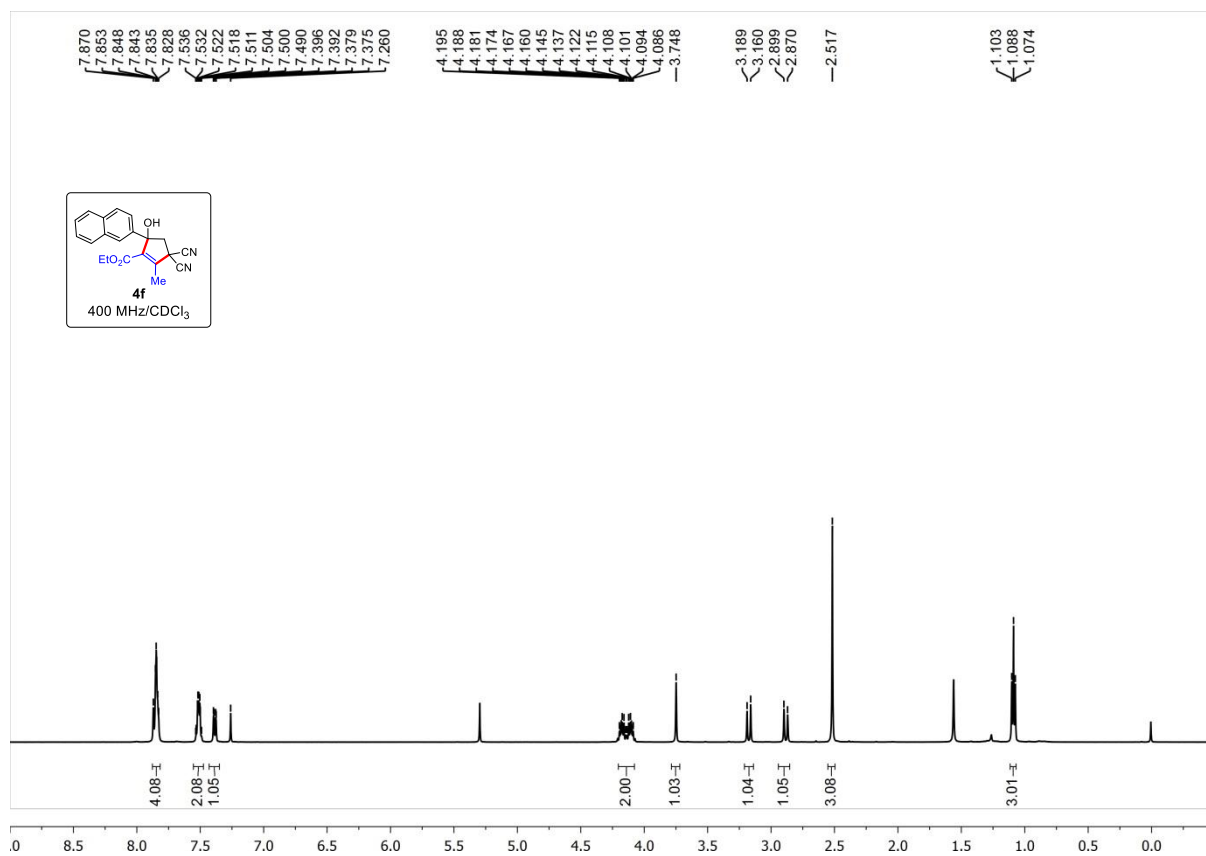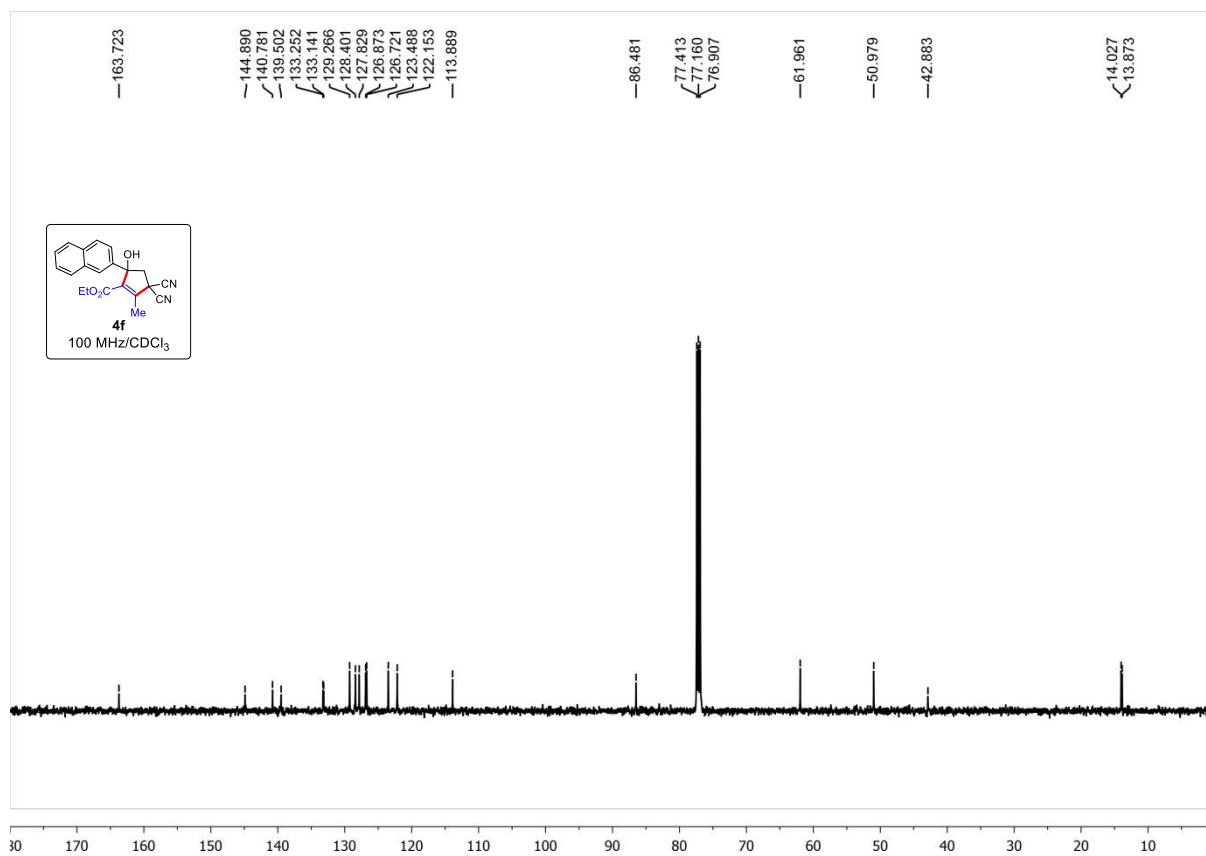

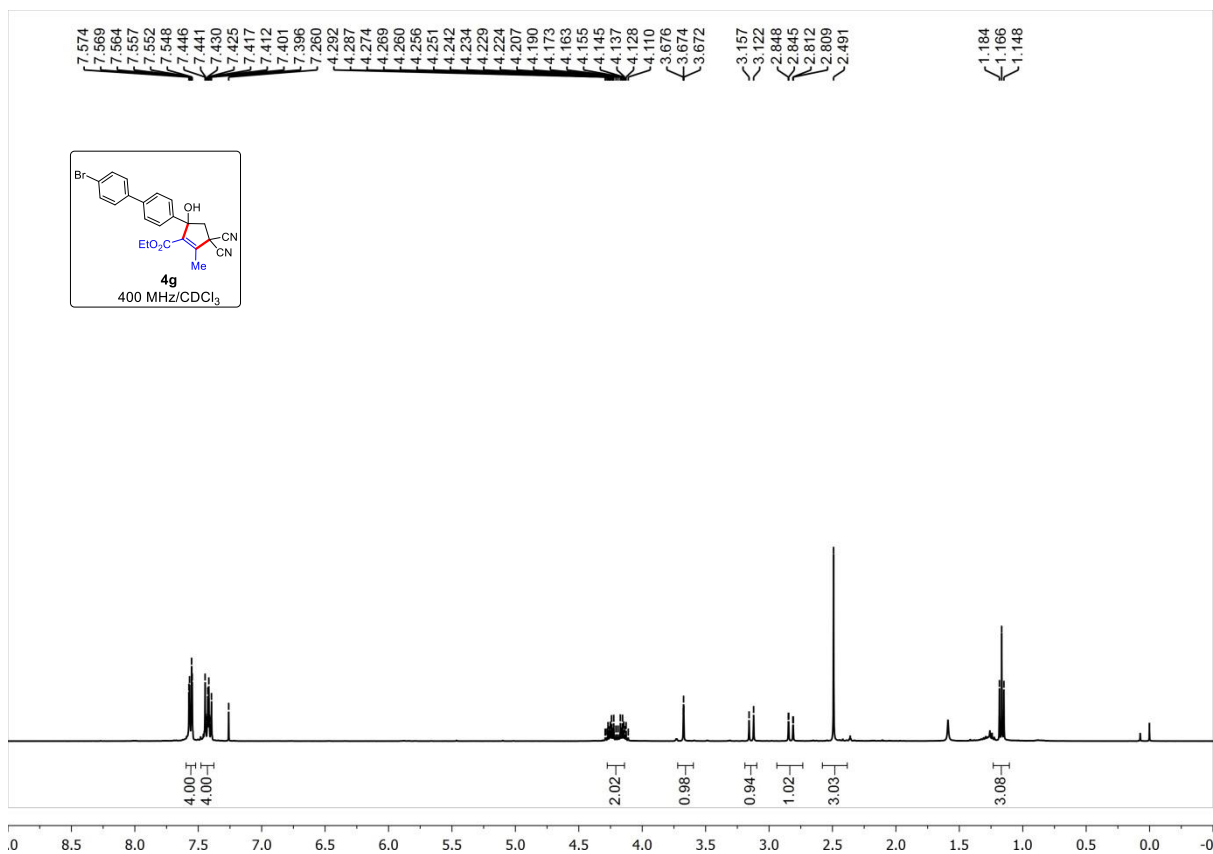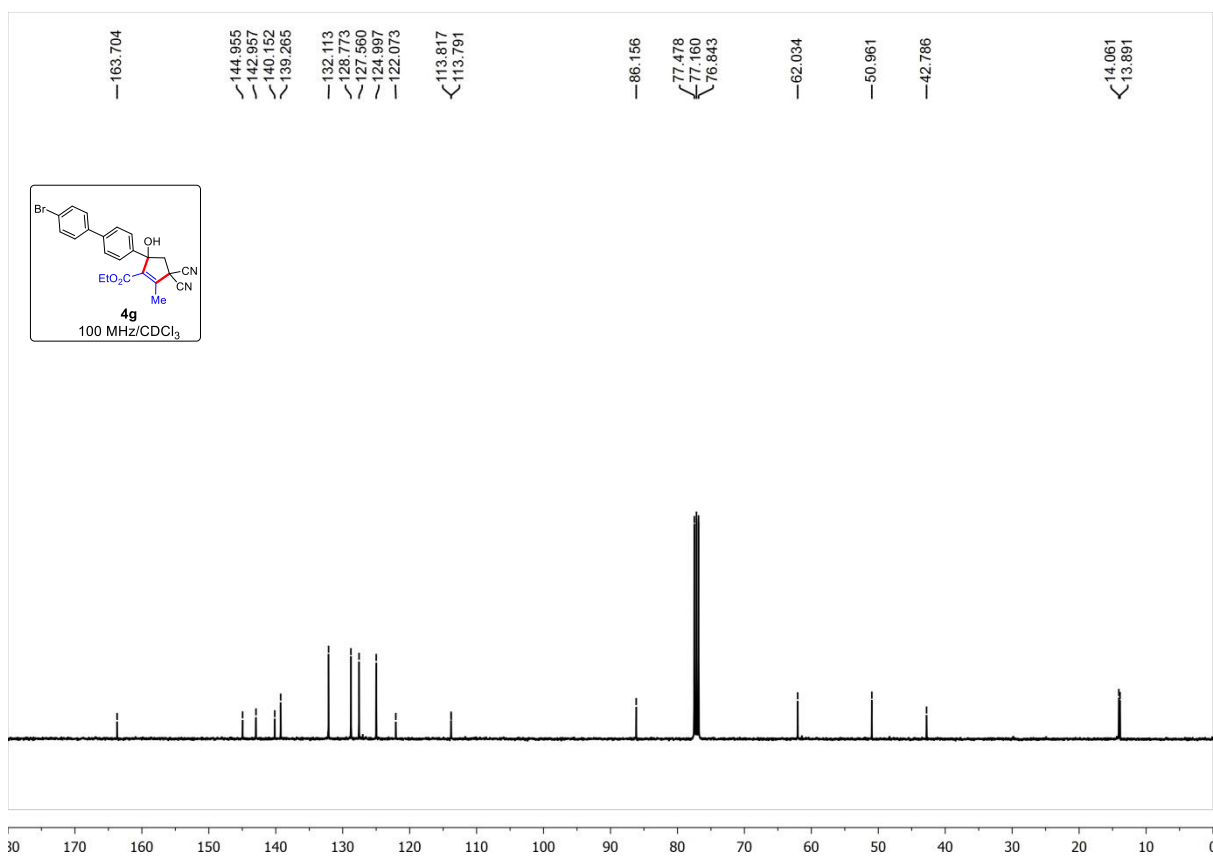

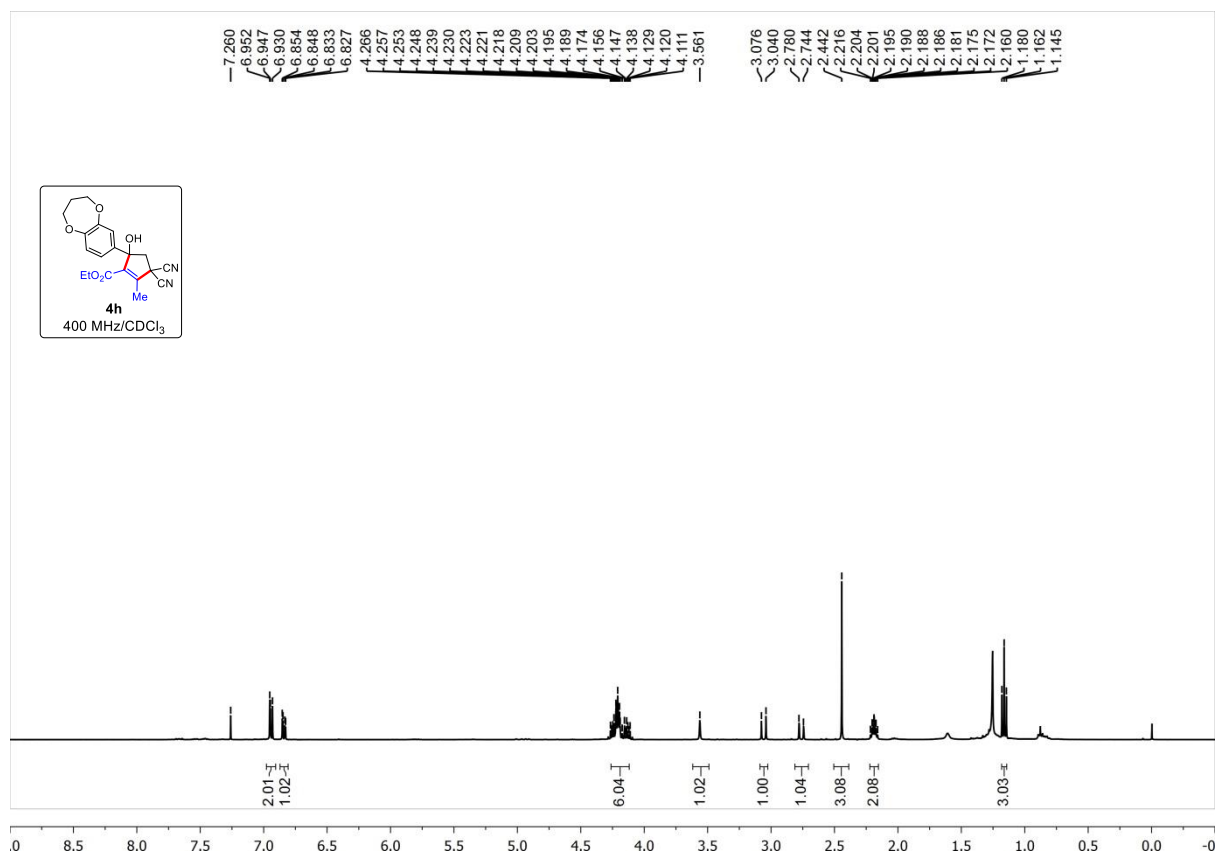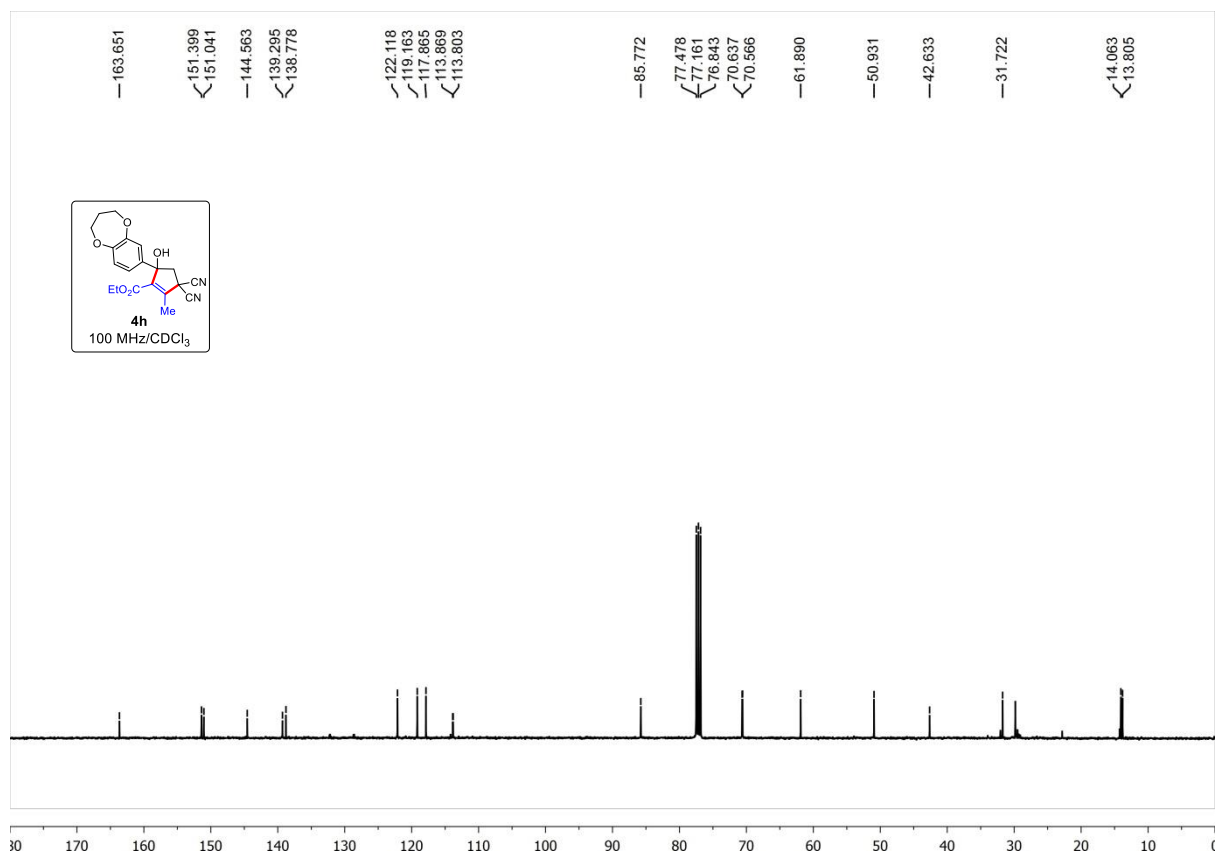

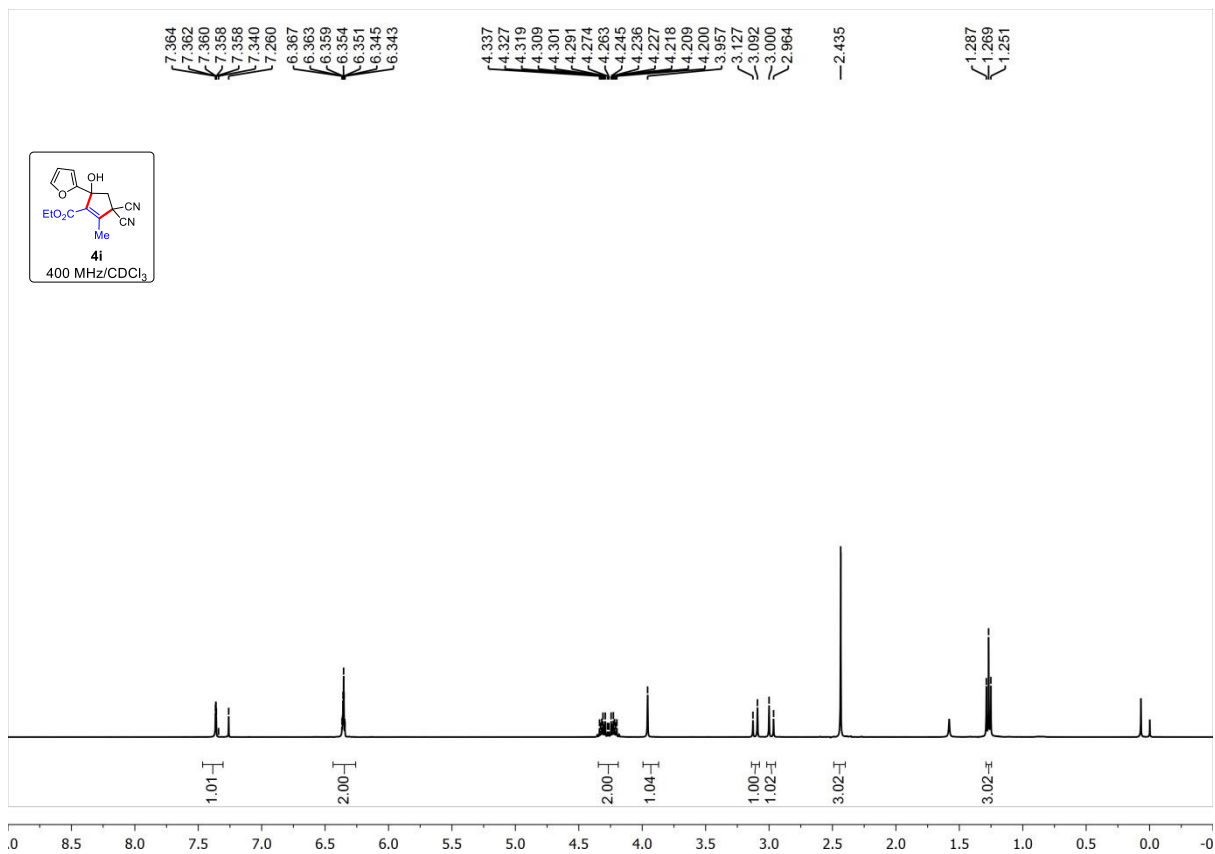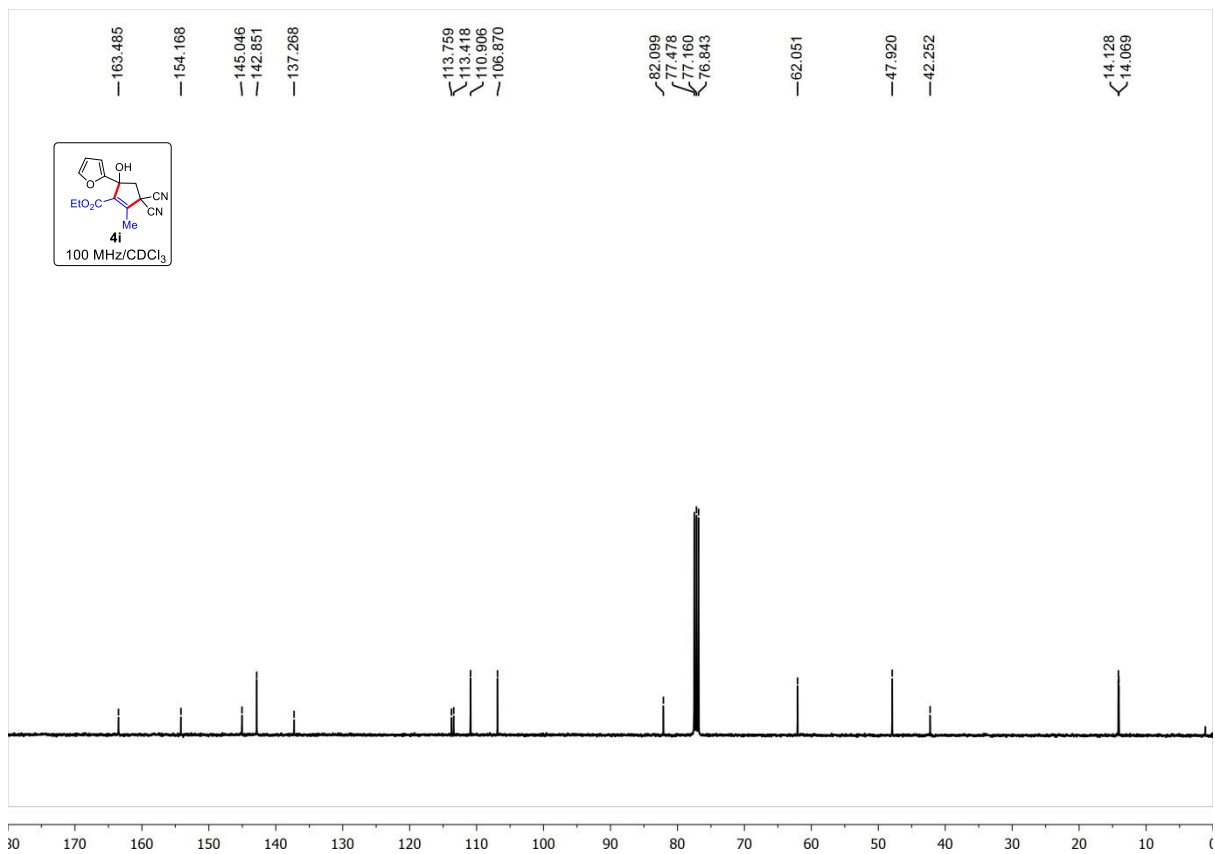

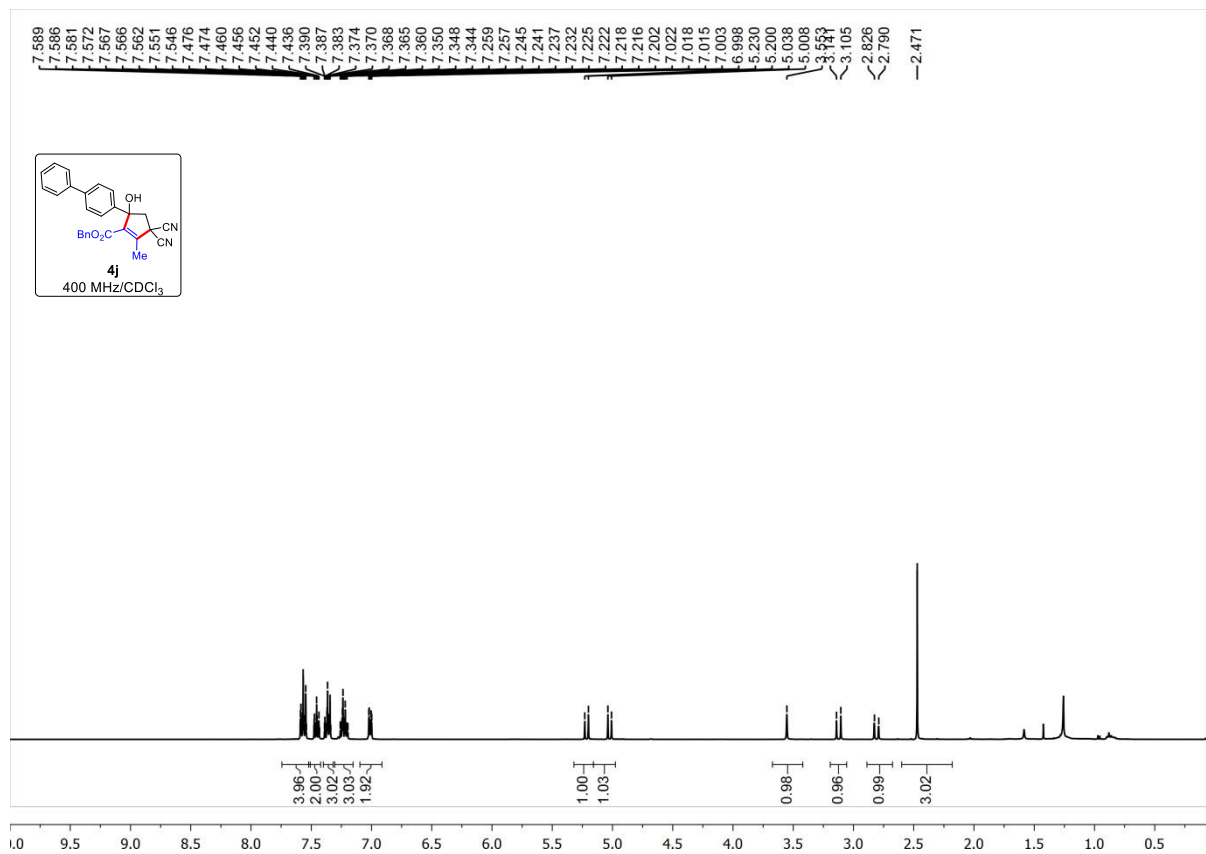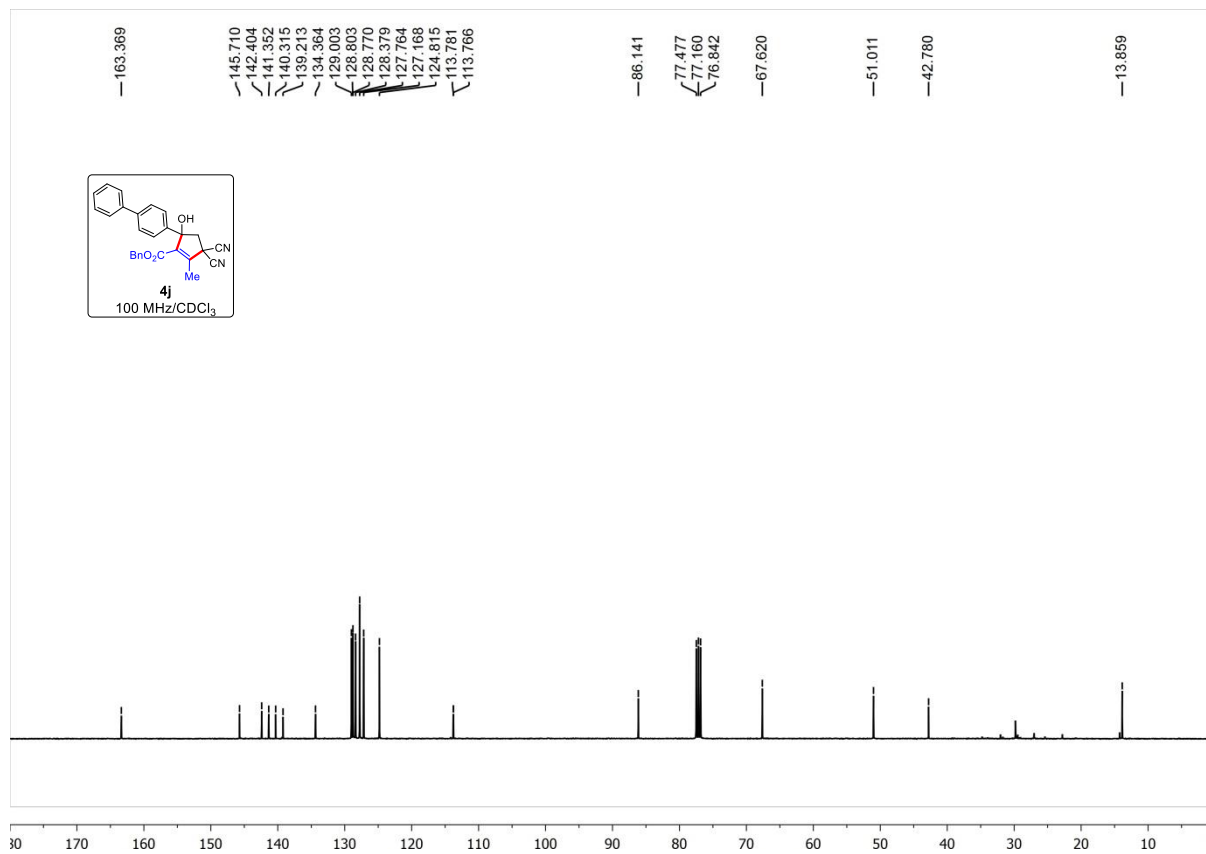

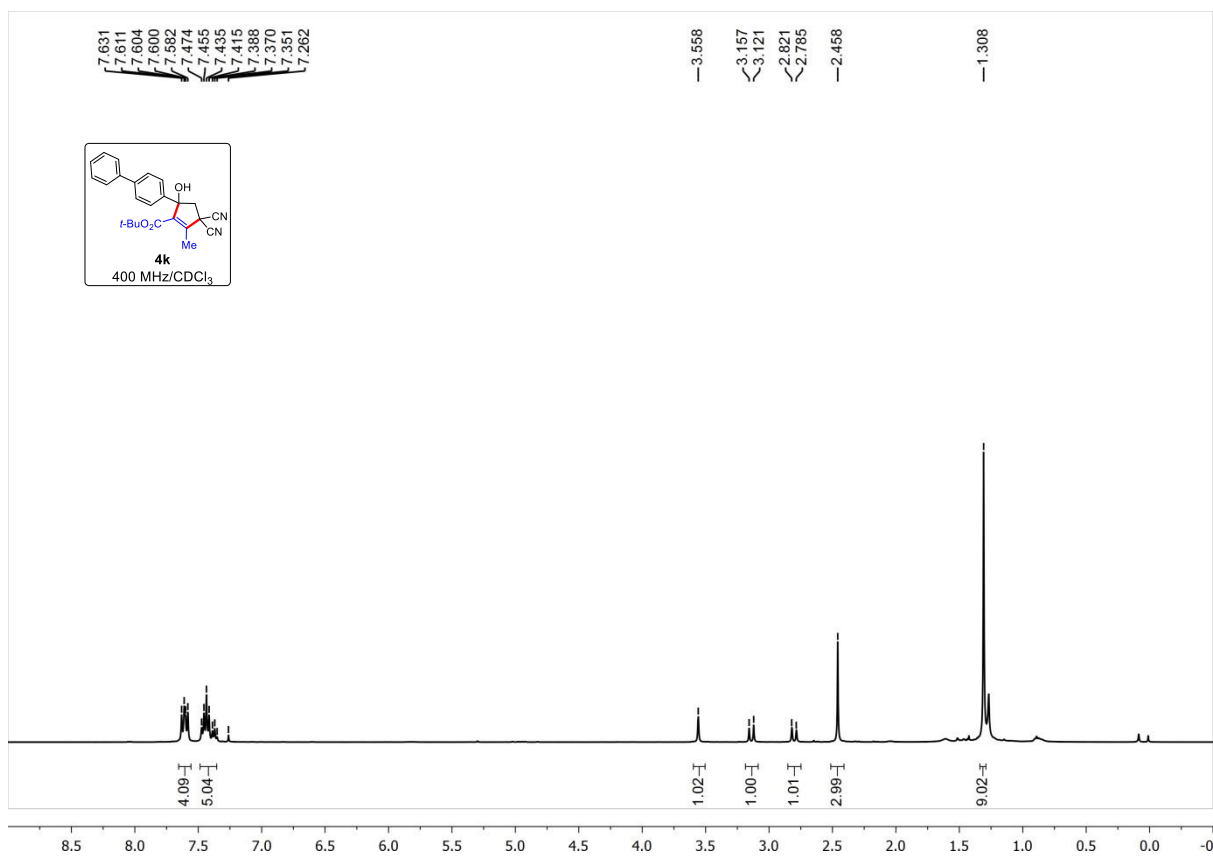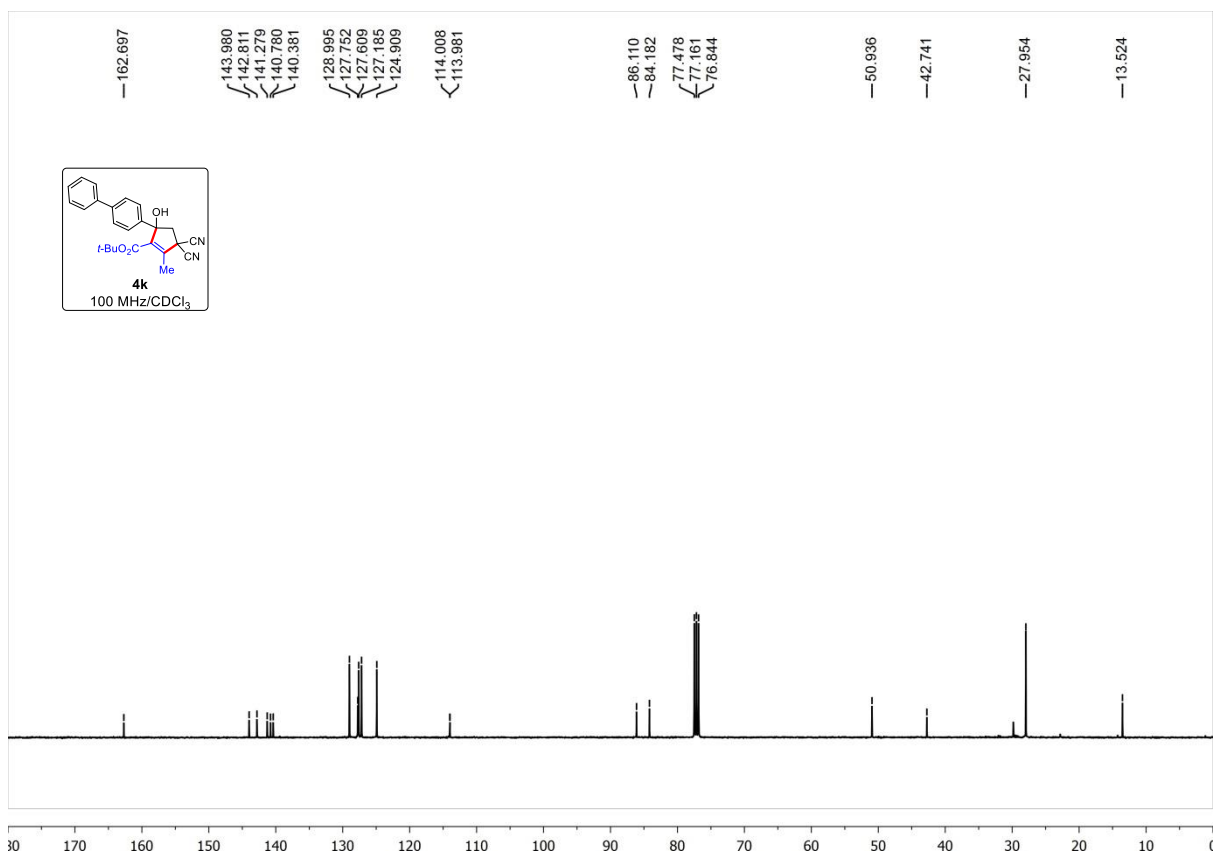

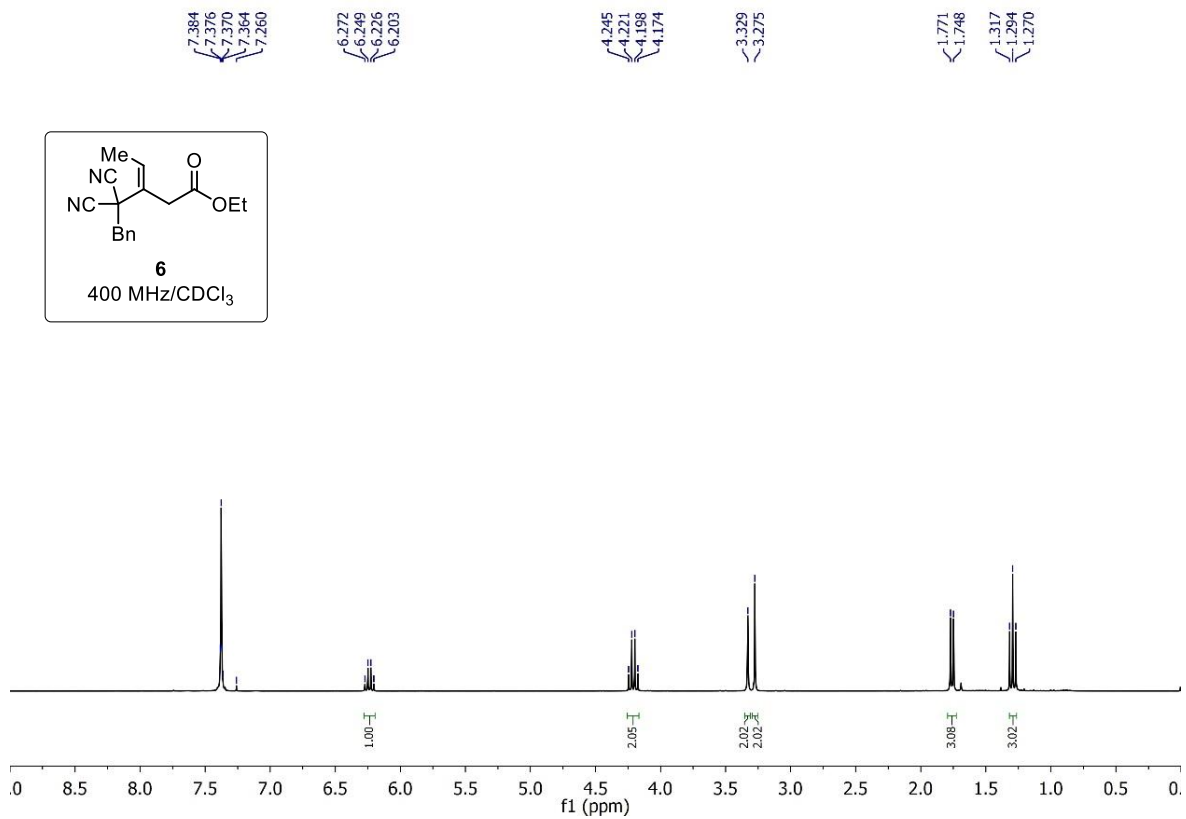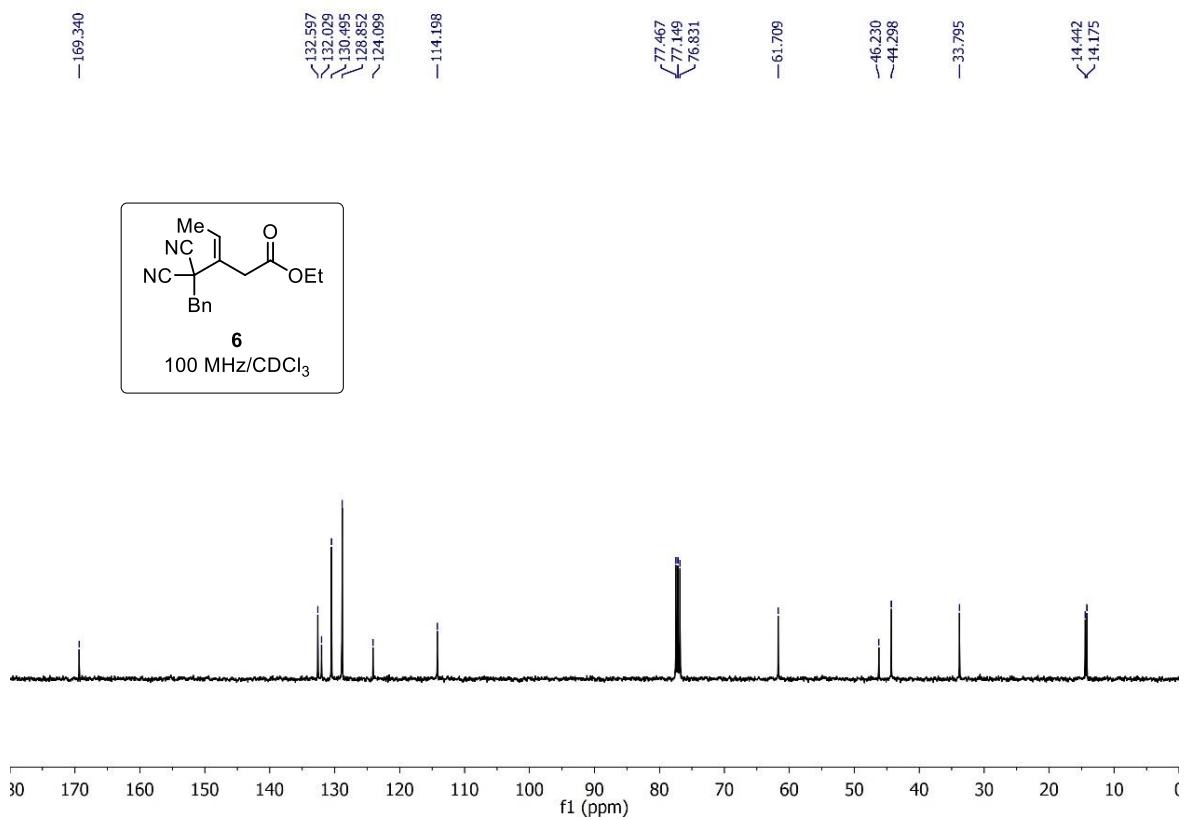

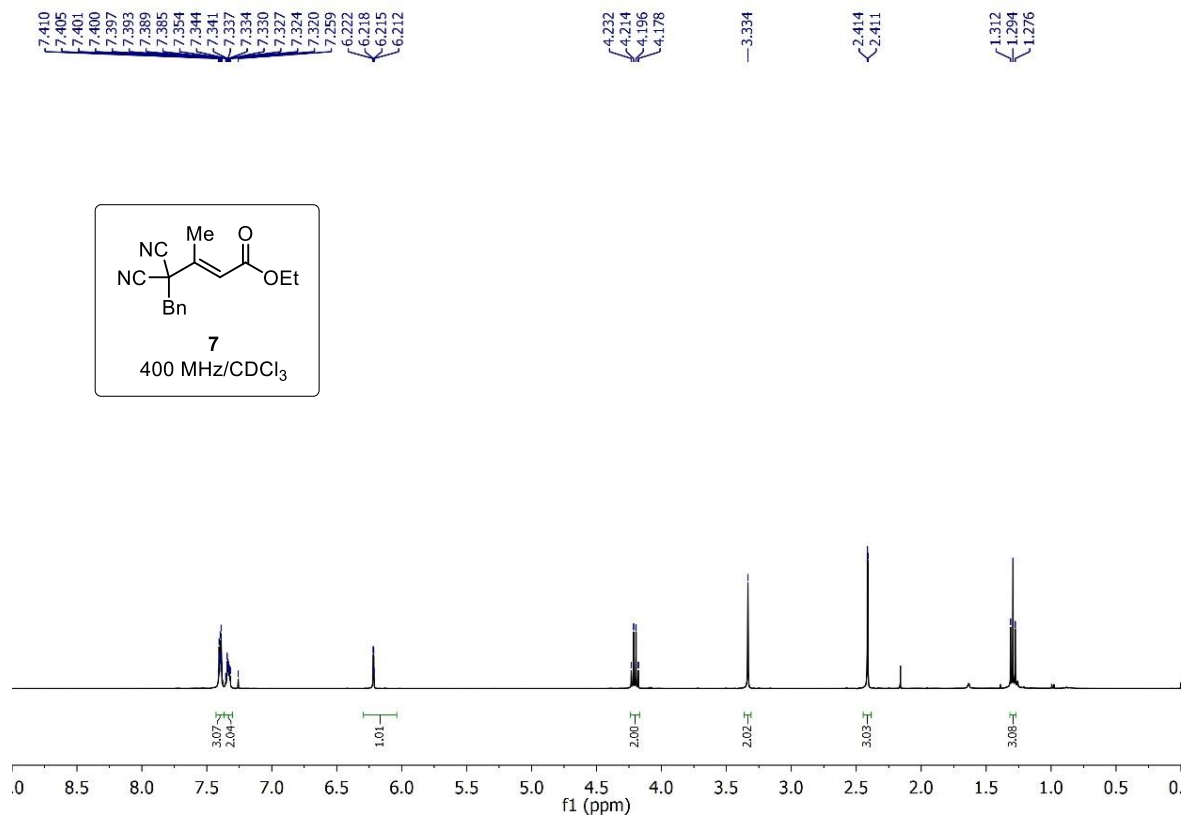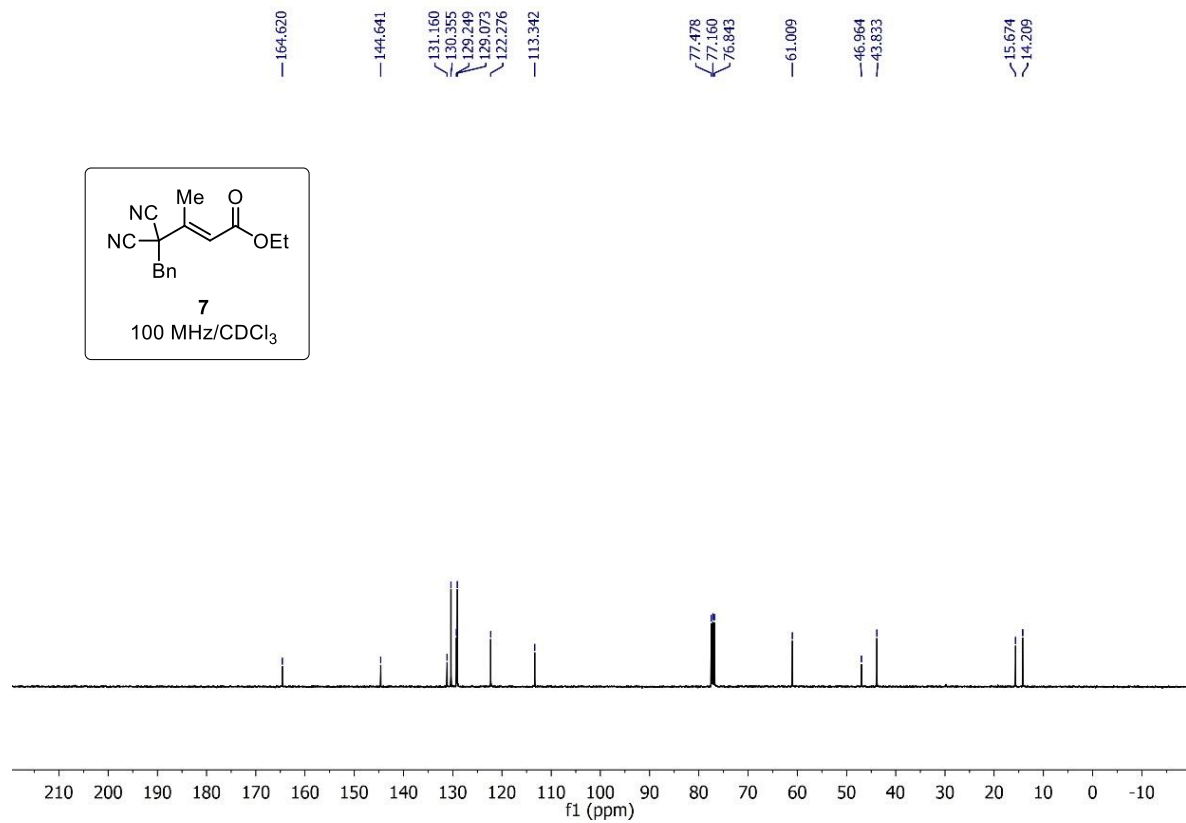

Supplement: d0cc04688d1.pdf [file d0cc04688d1.pdf]
